# Supplementary material
Source: publisher site journal article supplement (https://www.dovepress.com/article/505404)
Supplement: Supplementary file 1 [file get_supplementary_file.php]

## Supplementary file 1

### Integrative review

---

Models and practices of integrated acute geriatric care incorporating complementary and integrative medicine: a protocol for an integrative review

**Recherche effectuée par :**

Pauline MELLY, School of Health Sciences, HES-SO Valais-Wallis, 5, Chemin de l'Agasse, CH-1950 Sion, Switzerland

**Recherche révisée par :**

**Date :**

**A l'attention de :**

Henk VERLOO, School of Health Sciences, HES-SO Valais-Wallis, 5, Chemin de l'Agasse, CH-1950 Sion, Switzerland

## Table des matières

|       |                                                                  |    |
|-------|------------------------------------------------------------------|----|
| 1     | Questions de recherche .....                                     | 3  |
| 2     | Sources de données exploitées .....                              | 3  |
| 3     | Recherches ciblant l'hospitalisation .....                       | 4  |
| 3.1   | Vocabulaire .....                                                | 4  |
| 3.2   | Stratégies de recherche.....                                     | 6  |
| 3.2.1 | Embase.com.....                                                  | 6  |
| 3.2.2 | Medline Ovid SP .....                                            | 6  |
| 3.2.3 | CINAHL EBSCO .....                                               | 7  |
| 3.2.4 | PsychInfo Ovid SP.....                                           | 8  |
| 3.2.5 | Web of Science -Core collection.....                             | 9  |
| 3.2.6 | Cochrane library Wiley.....                                      | 9  |
| 3.2.7 | Pubmed .....                                                     | 10 |
| 3.2.8 | ProQuest Dissertations and Theses A&I .....                      | 11 |
| 3.2.9 | CAMBase Complementary and Alternative Medicine.....              | 11 |
| 3.3   | Résultats.....                                                   | 12 |
| 4     | Recherches ciblant l'admission, la réadmission et la sortie..... | 13 |
| 4.1   | Vocabulaire .....                                                | 13 |
| 4.2   | Stratégies de recherche.....                                     | 15 |
| 4.2.1 | Embase.com.....                                                  | 15 |
| 4.2.2 | Medline Ovid SP .....                                            | 16 |
| 4.2.3 | CINAHL EBSCO .....                                               | 17 |
| 4.2.4 | PsychInfo Ovid SP.....                                           | 19 |
| 4.2.5 | Web of Science -Core collection.....                             | 21 |
| 4.2.6 | Cochrane library Wiley.....                                      | 22 |
| 4.2.7 | Pubmed .....                                                     | 23 |
| 4.2.8 | ProQuest Dissertations and Theses A&I .....                      | 24 |
| 4.2.9 | CAMBase Complementary and Alternative Medicine.....              | 25 |
| 4.3   | Résultats.....                                                   | 26 |

## 1 Questions de recherche

Conduct an integrative review of studies on IAGC (integrative acute geriatric care) models and practices in geriatric, psychogeriatric, internal medicine and rehabilitation units, including different types of CIM (complementary and integrative medicine) and their efficiency, effectiveness and implementation.

- 1) What models and practices of IAGC are used in geriatrics, psychogeriatrics, internal medicine and rehabilitation units for older adult inpatients with physical or mental illnesses?
- 2) How is IAGC integrated into local and regional community care?
- 3) How are patient and family preferences integrated into the IAGC and wellness processes?
- 4) What types of CIM are used or prescribed and which dimensions of wellness are emphasised in older adults' personalised therapeutic or care plans at discharge as parts of IAGC models?

## 2 Sources de données exploitées

### Bases de données principales

Medline Ovid ALL,  
Embase.com  
CINAHL  
APA PsycInfo Ovid  
Web of Science Core Collection  
ProQuest Dissertations & Theses A&I  
Cochrane Library  
Pubmed

### Bases de données complémentaires

CAMBase Complementary and Alternative Medicine

### 3 Recherches ciblant l'hospitalisation

#### 3.1 Vocabulaire

| Concepts                                | Integrated care                                                                                                                                                                                                                                                                                                                                                                                                                                                                                                                                                 | Hospitalisation                                                      | aged                                                                                                                                                                                                                                                                      | Complementary therapy                                                                                                                                                                                                                                                                                                                                                                                                                                                                                                                                                                                                                                                                                                                                                                                                                                                                                                                                                                                                                                                                                                                                                                                                                                                                                                                                                                                                                                                                                                                                                                                                                                                                    |
|-----------------------------------------|-----------------------------------------------------------------------------------------------------------------------------------------------------------------------------------------------------------------------------------------------------------------------------------------------------------------------------------------------------------------------------------------------------------------------------------------------------------------------------------------------------------------------------------------------------------------|----------------------------------------------------------------------|---------------------------------------------------------------------------------------------------------------------------------------------------------------------------------------------------------------------------------------------------------------------------|------------------------------------------------------------------------------------------------------------------------------------------------------------------------------------------------------------------------------------------------------------------------------------------------------------------------------------------------------------------------------------------------------------------------------------------------------------------------------------------------------------------------------------------------------------------------------------------------------------------------------------------------------------------------------------------------------------------------------------------------------------------------------------------------------------------------------------------------------------------------------------------------------------------------------------------------------------------------------------------------------------------------------------------------------------------------------------------------------------------------------------------------------------------------------------------------------------------------------------------------------------------------------------------------------------------------------------------------------------------------------------------------------------------------------------------------------------------------------------------------------------------------------------------------------------------------------------------------------------------------------------------------------------------------------------------|
| <b>Mots libres</b><br>Syntaxe<br>Embase | (Integrat* NEXT/1 (care OR healthcare OR delivery OR pathway* OR "hospital care")) OR "transition* care" OR "clinical pathway*" OR "patient care plan*" OR ((multi\$disciplinary OR inter\$professional OR inter\$disciplinary OR multi\$speciality OR multi\$agency OR inter\$agency OR multi\$professional OR inter\$sectoral) NEXT/1 (team* OR care OR healthcare OR collaboration OR intervention* OR management OR approach* OR program* OR treatment*)) OR hand\$off* OR ((coordinat* OR collaborat*) NEXT/1 (care OR service* OR program* OR approach*)) | hospital* OR inpatient*                                              | elder* OR eldest OR geriatr* OR "old aged" OR "oldest old*" OR "very old*" OR (older NEXT/1 (patient* OR people OR subject* OR age* OR adult* OR m?n OR male* OR wom?n OR female* OR population* OR person* OR individual*)) OR aging OR ageing OR senior* OR "late life" | ((alternative OR complementary OR traditional OR animal OR pet OR bee OR honey OR propolis OR leech OR physical OR manual OR manipulative OR dance OR music OR movement OR art OR energy OR spiritual OR clown OR humor OR humour OR laughter OR bio-resonance OR bioresonance OR garden* OR horticultural OR nature OR reflex OR diet OR nutrition OR "non-pharmacological" OR kinesis OR occupational OR meditative OR recreation OR exercise*) NEXT/1 therap*) OR "exercise training" OR "spiritual healing" OR acupuncture OR acupressure OR bodywork OR Shiatsu OR apitherap* OR homeotherap* OR homeopath* OR hirudotherap* OR leeching OR physiotherap* OR massage OR osteopath* OR chiropra* OR chirotherap* OR masso?therap* OR reflexolog* OR kinesiotherap* OR pilates OR naturopath* OR dietary OR dietician* OR yoga OR "tai ji" OR Taiji\$quan OR "Tai Chi" OR "chi kung" OR chigung OR qi?gong OR psychotherap* OR hypnos* OR hypnotherap* OR meditation OR relaxation OR mindfulness OR "breathing exercise*" OR "guided imagery" OR reflexotherap* OR breathwork OR cupping OR Reiki OR iridology OR gelototherap* OR psychodermatology OR aromatherap* OR "essential oil*" OR phytotherap* OR clowntherap* OR ethnomedicin* OR hydrotherap* OR rehabilitation OR ((alternative OR complementary OR traditional OR African OR Chinese OR herbal OR Indian OR kampo OR Korean OR American OR Mongolian OR oriental OR Tibetan OR Arabic OR Islamic OR persian OR unani OR native OR indigenous OR naturopathic OR energy OR spiritual OR vibrational OR osteopathic OR psycho-cutaneous OR psychocutaneous OR Integrative OR physical OR manipulative) NEXT/2 medicine*) |
| <b>Emtree</b>                           | 'integrated health care system'/de OR 'patient care team'/de OR 'collaborative care team'/de OR 'multidisciplinary team'/de OR 'transitional care'/de OR 'clinical handover'/de OR 'patient care planning'/de OR 'clinical pathway'/de OR 'health service'/de OR 'patient                                                                                                                                                                                                                                                                                       | 'hospitalization'/de OR 'hospital patient'/de OR 'length of stay'/de | 'aged'/exp OR 'elderly care'/exp OR 'geriatric patient'/de OR 'geriatrics'/exp OR 'geriatric care'/exp                                                                                                                                                                    | 'alternative medicine'/exp OR 'integrative medicine'/exp OR 'meditation'/exp OR 'psychotherapy'/exp OR 'traditional medicine'/exp OR 'medicinal plant'/exp OR 'therapy'/de OR 'acupuncture'/exp OR 'animal assisted therapy'/exp OR 'apitherapy'/de OR 'homeopathy'/de OR 'leeching'/de OR 'physical medicine'/exp OR 'diet therapy'/de OR 'rehabilitation'/exp                                                                                                                                                                                                                                                                                                                                                                                                                                                                                                                                                                                                                                                                                                                                                                                                                                                                                                                                                                                                                                                                                                                                                                                                                                                                                                                          |

|               |                                                                                                                                                                                                                                                                                                                                                |                                                                                                         |                                                                                                                                                  |                                                                                                                                                                                                                                                     |
|---------------|------------------------------------------------------------------------------------------------------------------------------------------------------------------------------------------------------------------------------------------------------------------------------------------------------------------------------------------------|---------------------------------------------------------------------------------------------------------|--------------------------------------------------------------------------------------------------------------------------------------------------|-----------------------------------------------------------------------------------------------------------------------------------------------------------------------------------------------------------------------------------------------------|
|               | assessment'/de OR 'hospital service'/exp OR 'health care delivery'/de OR 'interhospital cooperation'/de OR 'intersectoral collaboration'/de                                                                                                                                                                                                    |                                                                                                         |                                                                                                                                                  |                                                                                                                                                                                                                                                     |
| <b>MeSH</b>   | exp Delivery of Health Care, Integrated/ OR Continuity of Patient Care/ OR Transitional Care/ OR Patient Handoff/ OR Patient Care Team/ OR exp Patient Care Planning/ OR Health Services/ OR Delivery of Health Care/ OR exp Intersectoral Collaboration/ OR exp Interprofessional Relations/                                                  | Hospitalization/ OR Length of Stay/ OR Inpatients/                                                      | exp Aged/ OR exp Geriatrics/ OR exp Geriatric Nursing/ OR exp Geriatric Assessment/ OR exp Geriatric Psychiatry/                                 | exp Complementary Therapies/ OR exp Integrative Medicine/ OR exp Physical Therapy Modalities/ OR exp Psychotherapy/ OR exp plants, medicinal/ OR Therapeutics/ OR exp Apitherapy/ OR exp Leeching/ OR exp Nutrition Therapy/ OR exp Rehabilitation/ |
| <b>CINAHL</b> | MH "Health Care Delivery, Integrated" OR MH "Transitional Care" OR MH "Hand Off (Patient Safety)" OR MH "Multidisciplinary Care Team" OR MH "Health Services" OR MH "Patient Assessment+" OR MH "Health Care Delivery" OR MH "Continuity of Patient Care" OR MH "Patient Care Plans" OR MH "Critical Path" OR MH "Interprofessional Relations" | MH "Hospitalization" OR MH "Length of Stay" OR MH "Hospitalization of Older Persons" OR MH "Inpatients" | MH "Aged+" OR MH "Gerontologic Nursing+" OR MH "Geriatric Assessment+" OR MH "Geriatrics" OR MH "Geriatric Psychiatry" OR MH "Gerontologic Care" | MH "Alternative Therapies+" OR MH "Psychotherapy+" OR MH "Plants, Medicinal+" OR MH "Therapeutics" OR MH "Diet Therapy+" OR MH "Physical Medicine" OR MH "Rehabilitation+"                                                                          |

### Limitations

Date de publication : 1990 à 2023

Type de publications non comprise : NOT (letter\* OR news OR comment\* OR editorial\* OR congres\* OR abstract\* OR dissertation abstract\* OR conference\*)

## 3.2 Stratégies de recherche

### 3.2.1 Embase.com

|                       |                                                                                                                                                                                                                                                                                                                                                                                                                                                                                                                                                                                                                                                                                                                                                                                                                                                                                                                                                                                                                                                                                                                                                                                                                                                                                                                                                                                                                                                                                                                                                                                                                                                                                                                                                                                                                                                                                                                                                                                                                                                                                                                                                                                                                                                                                                                                                                                                                                                                                                                                                                                                                                                                                                                                                                                                                                                                                                                                                                                                                                                                                                                                                                                                                                                                                                                                                                                                                                                                                                                                                                                                                                                                                                               |
|-----------------------|---------------------------------------------------------------------------------------------------------------------------------------------------------------------------------------------------------------------------------------------------------------------------------------------------------------------------------------------------------------------------------------------------------------------------------------------------------------------------------------------------------------------------------------------------------------------------------------------------------------------------------------------------------------------------------------------------------------------------------------------------------------------------------------------------------------------------------------------------------------------------------------------------------------------------------------------------------------------------------------------------------------------------------------------------------------------------------------------------------------------------------------------------------------------------------------------------------------------------------------------------------------------------------------------------------------------------------------------------------------------------------------------------------------------------------------------------------------------------------------------------------------------------------------------------------------------------------------------------------------------------------------------------------------------------------------------------------------------------------------------------------------------------------------------------------------------------------------------------------------------------------------------------------------------------------------------------------------------------------------------------------------------------------------------------------------------------------------------------------------------------------------------------------------------------------------------------------------------------------------------------------------------------------------------------------------------------------------------------------------------------------------------------------------------------------------------------------------------------------------------------------------------------------------------------------------------------------------------------------------------------------------------------------------------------------------------------------------------------------------------------------------------------------------------------------------------------------------------------------------------------------------------------------------------------------------------------------------------------------------------------------------------------------------------------------------------------------------------------------------------------------------------------------------------------------------------------------------------------------------------------------------------------------------------------------------------------------------------------------------------------------------------------------------------------------------------------------------------------------------------------------------------------------------------------------------------------------------------------------------------------------------------------------------------------------------------------------------|
| <b>Stratégie</b>      | <p>((('integrated health care system'/de OR 'patient care team'/de OR 'collaborative care team'/de OR 'multidisciplinary team'/de OR 'transitional care'/de OR 'clinical handover'/de OR 'patient care planning'/de OR 'clinical pathway'/de OR 'health service'/de OR 'patient assessment'/de OR 'hospital service'/exp OR 'health care delivery'/de OR 'interhospital cooperation'/de OR 'intersectoral collaboration'/de OR ((Integrat* NEXT/1 (care OR healthcare OR delivery OR pathway* OR "hospital care")) OR "transition* care" OR "clinical pathway*" OR "patient care plan*" OR ((multi\$disciplinary OR inter\$professional OR inter\$disciplinary OR multi\$speciality OR multi\$agency OR inter\$agency OR multi\$professional OR inter\$sectoral) NEXT/1 (team* OR care OR healthcare OR collaboration OR intervention* OR management OR approach* OR program* OR treatment*)) OR hand\$off* OR ((coordinat* OR collaborat*) NEXT/1 (care OR service* OR program* OR approach*)):ab,ti) AND ('hospitalization'/de OR 'hospital patient'/de OR 'length of stay'/de OR (hospital* OR inpatient*):ab,ti) AND ('aged'/exp OR 'elderly care'/exp OR 'geriatric patient'/de OR 'geriatrics'/exp OR 'geriatric care'/exp OR (elder* OR eldest OR geriatr* OR "old aged" OR "oldest old*" OR "very old*" OR (older NEXT/1 (patient* OR people OR subject* OR age* OR adult* OR m?n OR male* OR wom?n OR female* OR population* OR person* OR individual*)) OR aging OR ageing OR senior* OR "late life"):ab,ti) AND ('alternative medicine'/exp OR 'integrative medicine'/exp OR 'meditation'/exp OR 'psychotherapy'/exp OR 'traditional medicine'/exp OR 'medicinal plant'/exp OR 'therapy'/de OR 'acupuncture'/exp OR 'animal assisted therapy'/exp OR 'apitherapy'/de OR 'homeopathy'/de OR 'leeching'/de OR 'physical medicine'/exp OR 'diet therapy'/de OR 'rehabilitation'/exp OR (((alternative OR complementary OR traditional OR animal OR pet OR bee OR honey OR propolis OR leech OR physical OR manual OR manipulative OR dance OR music OR movement OR art OR energy OR spiritual OR clown OR humor OR humour OR laughter OR bio-resonance OR bioresonance OR garden* OR horticultural OR nature OR reflex OR diet OR nutrition OR "non-pharmacological" OR kinesis OR occupational OR meditative OR recreation OR exercise*) NEXT/1 therap*) OR "exercise training" OR "spiritual healing" OR acupuncture OR acupressure OR bodywork OR Shiatsu OR apitherap* OR homeotherap* OR homeopath* OR hirudotherap* OR leeching OR physiotherap* OR massage OR osteopath* OR chiropra* OR chirotherap* OR masso?therap* OR reflexolog* OR kinesiotherap* OR pilates OR naturopath* OR dietary OR dietician* OR yoga OR "tai ji" OR Taiji\$quan OR "Tai Chi" OR "chi kung" OR chigung OR qi?gong OR psychotherap* OR hypnos* OR hypnotherap* OR meditation OR relaxation OR mindfulness OR "breathing exercise*" OR "guided imagery" OR reflexotherap* OR breathwork OR cupping OR Reiki OR iridology OR gelototherap* OR psychodermatology OR aromatherap* OR "essential oil*" OR phytotherap* OR clowntherap* OR ethnomedicin* OR hydrotherap* OR rehabilitation OR ((alternative OR complementary OR traditional OR African OR Chinese OR herbal OR Indian OR kampo OR Korean OR American OR Mongolian OR oriental OR Tibetan OR Arabic OR Islamic OR persian OR unani OR native OR indigenous OR naturopathic OR energy OR spiritual OR vibrational OR osteopathic OR psycho-cutaneous OR psychocutaneous OR Integrative OR physical OR manipulative) NEXT/2 medicine*)):ab,ti) AND ([1990-2023]/py)) NOT (((Conference Abstract)/lim OR [Letter]/lim OR [Note]/lim OR [Editorial]/lim))</p> |
| <b>Commentaires</b>   |                                                                                                                                                                                                                                                                                                                                                                                                                                                                                                                                                                                                                                                                                                                                                                                                                                                                                                                                                                                                                                                                                                                                                                                                                                                                                                                                                                                                                                                                                                                                                                                                                                                                                                                                                                                                                                                                                                                                                                                                                                                                                                                                                                                                                                                                                                                                                                                                                                                                                                                                                                                                                                                                                                                                                                                                                                                                                                                                                                                                                                                                                                                                                                                                                                                                                                                                                                                                                                                                                                                                                                                                                                                                                                               |
| <b>Réf. trouvées.</b> | 3156 références trouvées le 20.09.2023                                                                                                                                                                                                                                                                                                                                                                                                                                                                                                                                                                                                                                                                                                                                                                                                                                                                                                                                                                                                                                                                                                                                                                                                                                                                                                                                                                                                                                                                                                                                                                                                                                                                                                                                                                                                                                                                                                                                                                                                                                                                                                                                                                                                                                                                                                                                                                                                                                                                                                                                                                                                                                                                                                                                                                                                                                                                                                                                                                                                                                                                                                                                                                                                                                                                                                                                                                                                                                                                                                                                                                                                                                                                        |

### 3.2.2 Medline Ovid SP

|                  |                                                                                                                                                                                                                                                                                                                                                                                                                                                                                                                                                                                                                                                                                                                                                                                                                                                                                                                                                                                                                                                                                                                                                                                                                                                                                                                                                                    |
|------------------|--------------------------------------------------------------------------------------------------------------------------------------------------------------------------------------------------------------------------------------------------------------------------------------------------------------------------------------------------------------------------------------------------------------------------------------------------------------------------------------------------------------------------------------------------------------------------------------------------------------------------------------------------------------------------------------------------------------------------------------------------------------------------------------------------------------------------------------------------------------------------------------------------------------------------------------------------------------------------------------------------------------------------------------------------------------------------------------------------------------------------------------------------------------------------------------------------------------------------------------------------------------------------------------------------------------------------------------------------------------------|
| <b>Stratégie</b> | <p>((exp "Delivery of Health Care, Integrated"/ OR "Continuity of Patient Care"/ OR "Transitional Care"/ OR "Patient Handoff"/ OR "Patient Care Team"/ OR exp "Patient Care Planning"/ OR "Health Services"/ OR "Delivery of Health Care"/ OR exp "Intersectoral Collaboration"/ OR exp "Interprofessional Relations"/ OR ((Integrat* ADJ (care OR healthcare OR delivery OR pathway* OR "hospital care")) OR "transition* care" OR "clinical pathway*" OR "patient care plan*" OR ((multi?disciplinary OR inter?professional OR inter?disciplinary OR multi?speciality OR multi?agency OR inter?agency OR multi?professional OR inter?sectoral) ADJ (team? OR care OR healthcare OR collaboration OR intervention* OR management OR approach* OR program* OR treatment*)) OR hand?off* OR ((coordinat* OR collaborat*) ADJ (care OR service* OR program* OR approach*)):ab,ti.) AND (Hospitalization/ OR Length of Stay/ OR Inpatients/ OR (hospital* OR inpatient*).ab,ti.) AND (exp "Aged"/ OR exp "Geriatrics"/ OR exp "Geriatric Nursing"/ OR exp "Geriatric Assessment"/ OR exp "Geriatric Psychiatry"/ OR (elder* OR eldest OR geriatr* OR "old aged" OR "oldest old*" OR "very old*" OR (older ADJ (patient* OR people OR subject* OR age* OR adult* OR man OR men OR male* OR woman OR women OR female* OR population* OR person* OR individual*)) OR</p> |
|------------------|--------------------------------------------------------------------------------------------------------------------------------------------------------------------------------------------------------------------------------------------------------------------------------------------------------------------------------------------------------------------------------------------------------------------------------------------------------------------------------------------------------------------------------------------------------------------------------------------------------------------------------------------------------------------------------------------------------------------------------------------------------------------------------------------------------------------------------------------------------------------------------------------------------------------------------------------------------------------------------------------------------------------------------------------------------------------------------------------------------------------------------------------------------------------------------------------------------------------------------------------------------------------------------------------------------------------------------------------------------------------|

|                       |                                                                                                                                                                                                                                                                                                                                                                                                                                                                                                                                                                                                                                                                                                                                                                                                                                                                                                                                                                                                                                                                                                                                                                                                                                                                                                                                                                                                                                                                                                                                                                                                                                                                                                                                                                                                                                                                                                                                                                                                                                                                                                                           |
|-----------------------|---------------------------------------------------------------------------------------------------------------------------------------------------------------------------------------------------------------------------------------------------------------------------------------------------------------------------------------------------------------------------------------------------------------------------------------------------------------------------------------------------------------------------------------------------------------------------------------------------------------------------------------------------------------------------------------------------------------------------------------------------------------------------------------------------------------------------------------------------------------------------------------------------------------------------------------------------------------------------------------------------------------------------------------------------------------------------------------------------------------------------------------------------------------------------------------------------------------------------------------------------------------------------------------------------------------------------------------------------------------------------------------------------------------------------------------------------------------------------------------------------------------------------------------------------------------------------------------------------------------------------------------------------------------------------------------------------------------------------------------------------------------------------------------------------------------------------------------------------------------------------------------------------------------------------------------------------------------------------------------------------------------------------------------------------------------------------------------------------------------------------|
|                       | aging OR ageing OR senior* OR "late life").ab,ti.) AND (exp "Complementary Therapies"/ OR exp "Integrative Medicine"/ OR exp "Physical Therapy Modalities"/ OR exp "Psychotherapy"/ OR exp "plants, medicinal"/ OR "Therapeutics"/ OR exp "Apitherapy"/ OR exp "Leeching"/ OR exp "Nutrition Therapy"/ OR exp "Rehabilitation"/ OR (((alternative OR complementary OR traditional OR animal OR pet OR bee OR honey OR propolis OR leech OR physical OR manual OR manipulative OR dance OR music OR movement OR art OR energy OR spiritual OR clown OR humor OR humour OR laughter OR bio-resonance OR bioresonance OR garden* OR horticultural OR nature OR reflex OR diet OR nutrition OR "non-pharmacological" OR kinesis OR occupational OR meditative OR recreation) ADJ therap*) OR "exercise training" OR "spiritual healing" OR acupuncture OR acupressure OR bodywork OR Shiatsu OR apitherap* OR homeotherap* OR homeopath* OR hirudotherap* OR leeching OR physiotherap* OR massage OR osteopath* OR chiropra* OR chirotherap* OR masso?therap* OR reflexolog* OR kinesiotherap* OR pilates OR naturopath* OR dietary OR dietician* OR yoga OR "tai ji" OR Taiji?quan OR "Tai Chi" OR "chi kung" OR chigung OR qi#gong OR psychotherap* OR hypnos* OR hypnotherap* OR meditation OR relaxation OR mindfulness OR "breathing exercise*" OR "guided imagery" OR reflexotherap* OR breathwork OR cupping OR Reiki OR iridology OR gelototherap* OR psychodermatology OR aromatherap* OR "essential oil*" OR phytotherap* OR clowntherap* OR ethnomedicin*OR hydrotherap* OR rehabilitation OR ((alternative OR complementary OR traditional OR African OR Chinese OR herbal OR Indian OR kampo OR Korean OR American OR Mongolian OR oriental OR Tibetan OR Arabic OR Islamic OR persian OR unani OR native OR indigenous OR naturopathic OR energy OR spiritual OR vibrational OR osteopathic OR psycho-cutaneous OR psychocutaneous OR Integrative OR physical OR manipulative) ADJ medicine),.ab,ti.)) NOT ((letter* OR news OR comment* OR editorial* OR congres* OR abstract* OR dissertation abstract*).pt.) |
| <b>Commentaires</b>   | Ovid MEDLINE(R) ALL 1946 to September 19, 2023<br><b>Ajouter le filtre de date manuellement</b>                                                                                                                                                                                                                                                                                                                                                                                                                                                                                                                                                                                                                                                                                                                                                                                                                                                                                                                                                                                                                                                                                                                                                                                                                                                                                                                                                                                                                                                                                                                                                                                                                                                                                                                                                                                                                                                                                                                                                                                                                           |
| <b>Réf. trouvées.</b> | 3166 références trouvées le 20.09.2023                                                                                                                                                                                                                                                                                                                                                                                                                                                                                                                                                                                                                                                                                                                                                                                                                                                                                                                                                                                                                                                                                                                                                                                                                                                                                                                                                                                                                                                                                                                                                                                                                                                                                                                                                                                                                                                                                                                                                                                                                                                                                    |

### 3.2.3 CINAHL EBSCO

|                  |                                                                                                                                                                                                                                                                                                                                                                                                                                                                                                                                                                                                                                                                                                                                                                                                                                                                                                                                                                                                                                                                                                                                                                                                                                                                                                                                                                                                                                                                                                                                                                                                                                                                                                                                                                                                                                                                                                                                                                                                                                                                                                                                                                                                                                                                                                                                                                                                                                                                                                                                                                                                                                                                                                                                                                                                                                                                                                                                                                                                                                                                                                                                                                                |
|------------------|--------------------------------------------------------------------------------------------------------------------------------------------------------------------------------------------------------------------------------------------------------------------------------------------------------------------------------------------------------------------------------------------------------------------------------------------------------------------------------------------------------------------------------------------------------------------------------------------------------------------------------------------------------------------------------------------------------------------------------------------------------------------------------------------------------------------------------------------------------------------------------------------------------------------------------------------------------------------------------------------------------------------------------------------------------------------------------------------------------------------------------------------------------------------------------------------------------------------------------------------------------------------------------------------------------------------------------------------------------------------------------------------------------------------------------------------------------------------------------------------------------------------------------------------------------------------------------------------------------------------------------------------------------------------------------------------------------------------------------------------------------------------------------------------------------------------------------------------------------------------------------------------------------------------------------------------------------------------------------------------------------------------------------------------------------------------------------------------------------------------------------------------------------------------------------------------------------------------------------------------------------------------------------------------------------------------------------------------------------------------------------------------------------------------------------------------------------------------------------------------------------------------------------------------------------------------------------------------------------------------------------------------------------------------------------------------------------------------------------------------------------------------------------------------------------------------------------------------------------------------------------------------------------------------------------------------------------------------------------------------------------------------------------------------------------------------------------------------------------------------------------------------------------------------------------|
| <b>Stratégie</b> | ((( MH "Health Care Delivery, Integrated" OR MH "Transitional Care" OR MH "Hand Off (Patient Safety)" OR MH "Multidisciplinary Care Team" OR MH "Health Services" OR MH "Patient Assessment+" OR MH "Health Care Delivery" OR MH "Continuity of Patient Care" OR MH "Patient Care Plans" OR MH "Critical Path" OR MH "Interprofessional Relations" ) OR TI ( (Integrat* W1 (care OR healthcare OR delivery OR pathway* OR "hospital care")) OR "transition* care" OR "clinical pathway*" OR "patient care plan*" OR ((multi#disciplinary OR inter#professional OR inter#disciplinary OR multi#speciality OR multi#agency OR inter#agency OR multi#professional OR inter#sectoral) W1 (team* OR care OR healthcare OR collaboration OR intervention* OR management OR approach* OR program* OR treatment*)) OR hand#off* OR ((coordinat* OR collaborat*) W1 (care OR service* OR program* OR approach* ) ) OR AB ( (Integrat* W1 (care OR healthcare OR delivery OR pathway* OR "hospital care")) OR "transition* care" OR "clinical pathway*" OR "patient care plan*" OR ((multi#disciplinary OR inter#professional OR inter#disciplinary OR multi#speciality OR multi#agency OR inter#agency OR multi#professional OR inter#sectoral) W1 (team* OR care OR healthcare OR collaboration OR intervention* OR management OR approach* OR program* OR treatment*)) OR hand#off* OR ((coordinat* OR collaborat*) W1 (care OR service* OR program* OR approach*)) ) ) AND (( MH "Hospitalization" OR MH "Length of Stay" OR MH "Hospitalization of Older Persons" OR MH "Inpatients" ) OR TI ( hospital* OR inpatient* ) OR AB ( hospital* OR inpatient* ) ) AND (( MH "Aged+" OR MH "Gerontologic Nursing+" OR MH "Geriatric Assessment+" OR MH "Geriatrics" OR MH "Geriatric Psychiatry" OR MH "Gerontologic Care" ) OR TI ( elder* OR eldest OR geriatr* OR "old aged" OR "oldest old*" OR "very old*" OR (older W1 (patient* OR people OR subject* OR age* OR adult* OR man OR men OR male* OR woman OR women OR female* OR population* OR person* OR individual*)) OR aging OR ageing OR senior* OR "late life" ) OR AB ( elder* OR eldest OR geriatr* OR "old aged" OR "oldest old*" OR "very old*" OR (older W1 (patient* OR people OR subject* OR age* OR adult* OR man OR men OR male* OR woman OR women OR female* OR population* OR person* OR individual*)) OR aging OR ageing OR senior* OR "late life" ) ) AND (( MH "Alternative Therapies+" OR MH "Psychotherapy+" OR MH "Plants, Medicinal+" OR MH "Therapeutics" OR MH "Diet Therapy+" OR MH "Physical Medicine" OR MH "Rehabilitation+" ) OR TI ( ((alternative OR complementary OR traditional OR animal OR pet OR bee OR honey OR propolis OR leech OR physical OR manual OR manipulative OR dance OR music OR movement OR art OR energy OR spiritual OR clown OR humor OR humour OR laughter OR bio-resonance OR bioresonance OR garden* OR horticultural OR nature OR reflex OR diet OR nutrition OR "non-pharmacological" OR kinesis OR occupational OR meditative OR recreation OR exercise*) W1 therap*) OR acupuncture OR acupressure OR bodywork OR Shiatsu OR apitherapy OR homeotherap* OR homeopath* |
|------------------|--------------------------------------------------------------------------------------------------------------------------------------------------------------------------------------------------------------------------------------------------------------------------------------------------------------------------------------------------------------------------------------------------------------------------------------------------------------------------------------------------------------------------------------------------------------------------------------------------------------------------------------------------------------------------------------------------------------------------------------------------------------------------------------------------------------------------------------------------------------------------------------------------------------------------------------------------------------------------------------------------------------------------------------------------------------------------------------------------------------------------------------------------------------------------------------------------------------------------------------------------------------------------------------------------------------------------------------------------------------------------------------------------------------------------------------------------------------------------------------------------------------------------------------------------------------------------------------------------------------------------------------------------------------------------------------------------------------------------------------------------------------------------------------------------------------------------------------------------------------------------------------------------------------------------------------------------------------------------------------------------------------------------------------------------------------------------------------------------------------------------------------------------------------------------------------------------------------------------------------------------------------------------------------------------------------------------------------------------------------------------------------------------------------------------------------------------------------------------------------------------------------------------------------------------------------------------------------------------------------------------------------------------------------------------------------------------------------------------------------------------------------------------------------------------------------------------------------------------------------------------------------------------------------------------------------------------------------------------------------------------------------------------------------------------------------------------------------------------------------------------------------------------------------------------------|

|                      |                                                                                                                                                                                                                                                                                                                                                                                                                                                                                                                                                                                                                                                                                                                                                                                                                                                                                                                                                                                                                                                                                                                                                                                                                                                                                                                                                                                                                                                                                                                                                                                                                                                                                                                                                                                                                                                                                                                                                                                                                                                                                                                                                                                                                                                                                                                                                                                                                                                                                                                                                                                                                                                                                                                                                                                                                                                                       |
|----------------------|-----------------------------------------------------------------------------------------------------------------------------------------------------------------------------------------------------------------------------------------------------------------------------------------------------------------------------------------------------------------------------------------------------------------------------------------------------------------------------------------------------------------------------------------------------------------------------------------------------------------------------------------------------------------------------------------------------------------------------------------------------------------------------------------------------------------------------------------------------------------------------------------------------------------------------------------------------------------------------------------------------------------------------------------------------------------------------------------------------------------------------------------------------------------------------------------------------------------------------------------------------------------------------------------------------------------------------------------------------------------------------------------------------------------------------------------------------------------------------------------------------------------------------------------------------------------------------------------------------------------------------------------------------------------------------------------------------------------------------------------------------------------------------------------------------------------------------------------------------------------------------------------------------------------------------------------------------------------------------------------------------------------------------------------------------------------------------------------------------------------------------------------------------------------------------------------------------------------------------------------------------------------------------------------------------------------------------------------------------------------------------------------------------------------------------------------------------------------------------------------------------------------------------------------------------------------------------------------------------------------------------------------------------------------------------------------------------------------------------------------------------------------------------------------------------------------------------------------------------------------------|
|                      | <p>OR hirudotherap* OR leeching OR physiotherap* OR massage OR osteopath* OR chiropra* OR chirotherap* OR masso?therap* OR reflexolog* OR kinesiotherap* OR pilates OR naturopath* OR dietary OR dietician* OR yoga OR "tai ji" OR Taiji#quan OR "Tai Chi" OR "chi kung" OR chigung OR qi#gong OR psychotherap* OR hypnos* OR hypnotherap* OR meditation OR relaxation OR mindfulness OR "breathing exercise*" OR "guided imagery OR reflexotherap* OR breathwork OR cupping OR Reiki OR iridology OR gelotherap* OR psychodermatology OR aromatherap* OR "essential oil*" OR phythotherap* OR clowntherap* OR ethnomedicin* OR hydrotherap* OR rehabilitation OR ((alternative OR complementary OR traditional OR African OR Chinese OR herbal OR Indian OR kampo OR Korean OR American OR Mongolian OR oriental OR Tibetan OR Arabic OR Islamic OR persian OR unani OR native OR indigenous OR naturopathic OR energy OR spiritual OR vibrational OR osteopathic OR psycho-cutaneous OR psychocutaneous OR Integrative OR physical OR manipulative) W1 medicine*) ) OR AB ( ((alternative OR complementary OR traditional OR animal OR pet OR bee OR honey OR propolis OR leech OR physical OR manual OR manipulative OR dance OR music OR movement OR art OR energy OR spiritual OR clown OR humor OR humour OR laughter OR bio-resonance OR bioresonance OR garden* OR horticultural OR nature OR reflex OR diet OR nutrition OR "non-pharmacological" OR kinesis OR occupational OR meditative OR recreation OR exercise*) W1 therap*) OR acupuncture OR acupressure OR bodywork OR Shiatsu OR apitherapy OR homeotherap* OR homeopath* OR hirudotherap* OR leeching OR physiotherap* OR massage OR osteopath* OR chiropra* OR chirotherap* OR masso?therap* OR reflexolog* OR kinesiotherap* OR pilates OR naturopath* OR dietary OR dietician* OR yoga OR "Tai Ji" OR Taiji#quan OR "Tai Chi" OR "chi kung" OR chigung OR qi#gong OR psychotherap* OR hypnos* OR hypnotherap* OR meditation OR relaxation OR mindfulness OR "breathing exercise*" OR "guided imagery OR reflexotherap* OR breathwork OR cupping OR Reiki OR iridology OR gelotherap* OR psychodermatology OR aromatherap* OR "essential oil*" OR phythotherap* OR clowntherap* OR ethnomedicin* OR hydrotherap* OR rehabilitation OR ((alternative OR complementary OR traditional OR African OR Chinese OR herbal OR Indian OR kampo OR Korean OR American OR Mongolian OR oriental OR Tibetan OR Arabic OR Islamic OR persian OR unani OR native OR indigenous OR naturopathic OR energy OR spiritual OR vibrational OR osteopathic OR psycho-cutaneous OR psychocutaneous OR Integrative OR physical OR manipulative) W1 medicine*) ))) NOT ( PT ( letter* OR news OR comment* OR editorial* OR congres* OR abstract* OR dissertation abstract* OR conference* ) ) AND ( PY 1990-2023 )</p> |
| <b>Commentaires</b>  |                                                                                                                                                                                                                                                                                                                                                                                                                                                                                                                                                                                                                                                                                                                                                                                                                                                                                                                                                                                                                                                                                                                                                                                                                                                                                                                                                                                                                                                                                                                                                                                                                                                                                                                                                                                                                                                                                                                                                                                                                                                                                                                                                                                                                                                                                                                                                                                                                                                                                                                                                                                                                                                                                                                                                                                                                                                                       |
| <b>Réf. trouvée.</b> | 2942 références trouvées le 20.09.2023                                                                                                                                                                                                                                                                                                                                                                                                                                                                                                                                                                                                                                                                                                                                                                                                                                                                                                                                                                                                                                                                                                                                                                                                                                                                                                                                                                                                                                                                                                                                                                                                                                                                                                                                                                                                                                                                                                                                                                                                                                                                                                                                                                                                                                                                                                                                                                                                                                                                                                                                                                                                                                                                                                                                                                                                                                |

### 3.2.4 PsychInfo Ovid SP

|                  |                                                                                                                                                                                                                                                                                                                                                                                                                                                                                                                                                                                                                                                                                                                                                                                                                                                                                                                                                                                                                                                                                                                                                                                                                                                                                                                                                                                                                                                                                                                                                                                                                                                                                                                                                                                                                                                                                                                                                                                                                                                                                                                                                                                                                                                                                                |
|------------------|------------------------------------------------------------------------------------------------------------------------------------------------------------------------------------------------------------------------------------------------------------------------------------------------------------------------------------------------------------------------------------------------------------------------------------------------------------------------------------------------------------------------------------------------------------------------------------------------------------------------------------------------------------------------------------------------------------------------------------------------------------------------------------------------------------------------------------------------------------------------------------------------------------------------------------------------------------------------------------------------------------------------------------------------------------------------------------------------------------------------------------------------------------------------------------------------------------------------------------------------------------------------------------------------------------------------------------------------------------------------------------------------------------------------------------------------------------------------------------------------------------------------------------------------------------------------------------------------------------------------------------------------------------------------------------------------------------------------------------------------------------------------------------------------------------------------------------------------------------------------------------------------------------------------------------------------------------------------------------------------------------------------------------------------------------------------------------------------------------------------------------------------------------------------------------------------------------------------------------------------------------------------------------------------|
| <b>Stratégie</b> | <p>((integrated services/ OR Continuity of Patient Care/ OR Transitional Care/ OR Patient Handoff/ OR Patient Care Team/ OR exp Patient Care Planning/ OR Health Services/ OR Delivery of Health Care/ OR exp Intersectoral Collaboration/ OR exp Interprofessional Relations/ OR ((Integrat* ADJ (care OR healthcare OR delivery OR pathway* OR "hospital care")) OR "transition* care" OR "clinical pathway*" OR "patient care plan*" OR ((multi?disciplinary OR inter?professional OR inter?disciplinary OR multi?speciality OR multi?agency OR inter?agency OR multi?professional OR inter?sectoral) ADJ (team? OR care OR healthcare OR collaboration OR intervention* OR management OR approach* OR program* OR treatment*)) OR hand?off* OR ((coordinat* OR collaborat*) ADJ (care OR service* OR program* OR approach*))).ab,ti.) AND (Hospitalization/ OR Length of Stay/ OR Inpatients/ OR (hospital* OR inpatient*).ab,ti.) AND (exp Aged/ OR exp Geriatrics/ OR exp Geriatric Nursing/ OR exp Geriatric Assessment/ OR exp Geriatric Psychiatry/ OR (elder* OR eldest OR geriatr* OR "old aged" OR "oldest old*" OR "very old*" OR (older ADJ (patient* OR people OR subject* OR age* OR adult* OR man OR men OR male* OR woman OR women OR female* OR population* OR person* OR individual*)) OR aging OR ageing OR senior* OR "late life").ab,ti.) AND (exp Complementary Therapies/ OR exp Integrative Medicine/ OR exp Physical Therapy Modalities/ OR exp Psychotherapy/ OR exp plants, medicinal/ OR Therapeutics/ OR exp Apitherapy/ OR exp Leeching/ OR exp Nutrition Therapy/ OR exp Rehabilitation/ OR (((alternative OR complementary OR traditional OR animal OR pet OR bee OR honey OR propolis OR leech OR physical OR manual OR manipulative OR dance OR music OR movement OR art OR energy OR spiritual OR clown OR humor OR humour OR laughter OR bio-resonance OR bioresonance OR garden* OR horticultural OR nature OR reflex OR diet OR nutrition OR "non-pharmacological" OR kinesis OR occupational OR meditative OR recreation) ADJ therap*) OR "exercise training" OR "spiritual healing" OR acupuncture OR acupressure OR bodywork OR Shiatsu OR apitherap* OR homeotherap* OR homeopath* OR hirudotherap* OR leeching OR physiotherap* OR massage OR</p> |
|------------------|------------------------------------------------------------------------------------------------------------------------------------------------------------------------------------------------------------------------------------------------------------------------------------------------------------------------------------------------------------------------------------------------------------------------------------------------------------------------------------------------------------------------------------------------------------------------------------------------------------------------------------------------------------------------------------------------------------------------------------------------------------------------------------------------------------------------------------------------------------------------------------------------------------------------------------------------------------------------------------------------------------------------------------------------------------------------------------------------------------------------------------------------------------------------------------------------------------------------------------------------------------------------------------------------------------------------------------------------------------------------------------------------------------------------------------------------------------------------------------------------------------------------------------------------------------------------------------------------------------------------------------------------------------------------------------------------------------------------------------------------------------------------------------------------------------------------------------------------------------------------------------------------------------------------------------------------------------------------------------------------------------------------------------------------------------------------------------------------------------------------------------------------------------------------------------------------------------------------------------------------------------------------------------------------|

|                      |                                                                                                                                                                                                                                                                                                                                                                                                                                                                                                                                                                                                                                                                                                                                                                                                                                                                                                                                                                                                                                                                                                                          |
|----------------------|--------------------------------------------------------------------------------------------------------------------------------------------------------------------------------------------------------------------------------------------------------------------------------------------------------------------------------------------------------------------------------------------------------------------------------------------------------------------------------------------------------------------------------------------------------------------------------------------------------------------------------------------------------------------------------------------------------------------------------------------------------------------------------------------------------------------------------------------------------------------------------------------------------------------------------------------------------------------------------------------------------------------------------------------------------------------------------------------------------------------------|
|                      | osteopath* OR chiropr* OR chirotherap* OR masso?therap* OR reflexolog* OR kinesiotherap* OR pilates OR naturopath* OR dietary OR dietician* OR yoga OR "tai ji" OR Taiji?quan OR "Tai Chi" OR "chi kung" OR chigung OR qi#gong OR psychotherap* OR hypnos* OR hypnotherap* OR meditation OR relaxation OR mindfulness OR "breathing exercise*" OR "guided imagery" OR reflexotherap* OR breathwork OR cupping OR Reiki OR iridology OR gelototherap* OR psychodermatology OR aromatherap* OR "essential oil*" OR phytotherap* OR clowntherap* OR ethnomedicin*OR hydrotherap* OR rehabilitation OR ((alternative OR complementary OR traditional OR African OR Chinese OR herbal OR Indian OR kampo OR Korean OR American OR Mongolian OR oriental OR Tibetan OR Arabic OR Islamic OR persian OR unani OR native OR indigenous OR naturopathic OR energy OR spiritual OR vibrational OR osteopathic OR psycho-cutaneous OR psychocutaneous OR Integrative OR physical OR manipulative) ADJ medicine)).ab.ti.))) NOT ((letter* OR news OR comment* OR editorial* OR congres* OR abstract* OR dissertation abstract*).pt.) |
| <b>Commentaires</b>  | APA PsycInfo 1806 to September Week 2 2023<br><b>Ajouter le filtre de date manuellement</b>                                                                                                                                                                                                                                                                                                                                                                                                                                                                                                                                                                                                                                                                                                                                                                                                                                                                                                                                                                                                                              |
| <b>Réf. trouvée.</b> | 159 références trouvées le 20.09.2023                                                                                                                                                                                                                                                                                                                                                                                                                                                                                                                                                                                                                                                                                                                                                                                                                                                                                                                                                                                                                                                                                    |

### 3.2.5 Web of Science -Core collection

|                      |                                                                                                                                                                                                                                                                                                                                                                                                                                                                                                                                                                                                                                                                                                                                                                                                                                                                                                                                                                                                                                                                                                                                                                                                                                                                                                                                                                                                                                                                                                                                                                                                                                                                                                                                                                                                                                                                                                                                                                                                                                                                                                                                                                                                                                                                                                                                                                                                                                                                                                                                                         |
|----------------------|---------------------------------------------------------------------------------------------------------------------------------------------------------------------------------------------------------------------------------------------------------------------------------------------------------------------------------------------------------------------------------------------------------------------------------------------------------------------------------------------------------------------------------------------------------------------------------------------------------------------------------------------------------------------------------------------------------------------------------------------------------------------------------------------------------------------------------------------------------------------------------------------------------------------------------------------------------------------------------------------------------------------------------------------------------------------------------------------------------------------------------------------------------------------------------------------------------------------------------------------------------------------------------------------------------------------------------------------------------------------------------------------------------------------------------------------------------------------------------------------------------------------------------------------------------------------------------------------------------------------------------------------------------------------------------------------------------------------------------------------------------------------------------------------------------------------------------------------------------------------------------------------------------------------------------------------------------------------------------------------------------------------------------------------------------------------------------------------------------------------------------------------------------------------------------------------------------------------------------------------------------------------------------------------------------------------------------------------------------------------------------------------------------------------------------------------------------------------------------------------------------------------------------------------------------|
| <b>Stratégie</b>     | TS=(((Integrat* NEAR/1 (care OR healthcare OR delivery OR pathway* OR "hospital care")) OR "transition* care" OR "clinical pathway*" OR "patient care plan*" OR ((multi\$disciplinary OR inter\$professional OR inter\$disciplinary OR multi\$speciality OR multi\$agency OR inter\$agency OR multi\$professional OR inter\$sectoral) NEAR/1 (team* OR care OR healthcare OR collaboration OR intervention* OR management OR approach* OR program* OR treatment*)) OR hand\$off* OR ((coordinat* OR collaborat*) NEAR/1 (care OR service* OR program* OR approach*)) AND (hospital* OR inpatient*) AND ((older NEAR/1 (patient* OR people OR subject* OR age* OR adult* OR m?n OR male* OR wom?n OR female* OR population* OR person* OR individual*)) OR aging OR ageing OR senior* OR "late life") AND (((alternative OR complementary OR traditional OR animal OR pet OR bee OR honey OR propolis OR leech OR physical OR manual OR manipulative OR dance OR music OR movement OR art OR energy OR spiritual OR clown OR humor OR humour OR laughter OR bio-resonance OR bioresonance OR garden* OR horticultural OR nature OR reflex OR diet OR nutrition OR "non-pharmacological" OR kinesis OR occupational OR meditative OR recreation OR exercise*) NEAR/1 therap*) OR "exercise training" OR "spiritual healing" OR acupuncture OR acupressure OR bodywork OR Shiatsu OR apitherap* OR homeotherap* OR homeopath* OR hirudotherap* OR leeching OR physiotherap* OR massage OR osteopath* OR chiropr* OR chirotherap* OR masso?therap* OR reflexolog* OR kinesiotherap* OR pilates OR naturopath* OR dietary OR dietician* OR yoga OR "tai ji" OR Taiji\$quan OR "Tai Chi" OR "chi kung" OR chigung OR qi?gong OR psychotherap* OR hypnos* OR hypnotherap* OR meditation OR relaxation OR mindfulness OR "breathing exercise*" OR "guided imagery" OR reflexotherap* OR breathwork OR cupping OR Reiki OR iridology OR gelototherap* OR psychodermatology OR aromatherap* OR "essential oil*" OR phytotherap* OR clowntherap* OR ethnomedicin*OR hydrotherap* OR rehabilitation OR ((alternative OR complementary OR traditional OR African OR Chinese OR herbal OR Indian OR kampo OR Korean OR American OR Mongolian OR oriental OR Tibetan OR Arabic OR Islamic OR persian OR unani OR native OR indigenous OR naturopathic OR energy OR spiritual OR vibrational OR osteopathic OR psycho-cutaneous OR psychocutaneous OR Integrative OR physical OR manipulative) NEAR/2 medicine*)) AND PY=(1990-2023) AND DT=(Article OR Review OR Book) |
| <b>Commentaires</b>  |                                                                                                                                                                                                                                                                                                                                                                                                                                                                                                                                                                                                                                                                                                                                                                                                                                                                                                                                                                                                                                                                                                                                                                                                                                                                                                                                                                                                                                                                                                                                                                                                                                                                                                                                                                                                                                                                                                                                                                                                                                                                                                                                                                                                                                                                                                                                                                                                                                                                                                                                                         |
| <b>Réf. trouvée.</b> | 1458 références trouvées le 20.09.2023                                                                                                                                                                                                                                                                                                                                                                                                                                                                                                                                                                                                                                                                                                                                                                                                                                                                                                                                                                                                                                                                                                                                                                                                                                                                                                                                                                                                                                                                                                                                                                                                                                                                                                                                                                                                                                                                                                                                                                                                                                                                                                                                                                                                                                                                                                                                                                                                                                                                                                                  |

### 3.2.6 Cochrane library Wiley

|                  |                                                                                                                                                                                                                                                                                                                                                                                                                                                                                                                                                        |
|------------------|--------------------------------------------------------------------------------------------------------------------------------------------------------------------------------------------------------------------------------------------------------------------------------------------------------------------------------------------------------------------------------------------------------------------------------------------------------------------------------------------------------------------------------------------------------|
| <b>Stratégie</b> | ((Integrat* NEXT (care OR healthcare OR delivery OR pathway* OR "hospital care")) OR "transition care" OR "transitional care" OR (clinical NEXT pathway*) OR ("patient care" NEXT plan*) OR (("multi disciplinary" OR multidisciplinary OR "inter professional" OR interprofessional OR interdisciplinary OR "inter disciplinary" OR multispeciality OR "multi speciality" OR multiagency OR "multi agency" OR interagency OR "inter agency" OR multiprofessional OR "multi professional" OR intersectoral OR "inter sectoral") NEXT (team* OR care OR |
|------------------|--------------------------------------------------------------------------------------------------------------------------------------------------------------------------------------------------------------------------------------------------------------------------------------------------------------------------------------------------------------------------------------------------------------------------------------------------------------------------------------------------------------------------------------------------------|

|                      |                                                                                                                                                                                                                                                                                                                                                                                                                                                                                                                                                                                                                                                                                                                                                                                                                                                                                                                                                                                                                                                                                                                                                                                                                                                                                                                                                                                                                                                                                                                                                                                                                                                                                                                                                                                                                                                                                                                                                                                                                                                                                                                                                                                                                                                                                                                                                         |
|----------------------|---------------------------------------------------------------------------------------------------------------------------------------------------------------------------------------------------------------------------------------------------------------------------------------------------------------------------------------------------------------------------------------------------------------------------------------------------------------------------------------------------------------------------------------------------------------------------------------------------------------------------------------------------------------------------------------------------------------------------------------------------------------------------------------------------------------------------------------------------------------------------------------------------------------------------------------------------------------------------------------------------------------------------------------------------------------------------------------------------------------------------------------------------------------------------------------------------------------------------------------------------------------------------------------------------------------------------------------------------------------------------------------------------------------------------------------------------------------------------------------------------------------------------------------------------------------------------------------------------------------------------------------------------------------------------------------------------------------------------------------------------------------------------------------------------------------------------------------------------------------------------------------------------------------------------------------------------------------------------------------------------------------------------------------------------------------------------------------------------------------------------------------------------------------------------------------------------------------------------------------------------------------------------------------------------------------------------------------------------------|
|                      | healthcare OR collaboration OR intervention* OR management OR approach* OR program* OR treatment*) OR handoff* OR (hand NEXT off*) OR ((coordinat* OR collaborat*) NEXT (care OR service* OR program* OR approach*)):ab,ti,kw AND (hospital* OR inpatient*):ab,ti,kw AND (elder* OR eldest OR geriatr* OR "old aged" OR (oldest NEXT old*) OR (very NEXT old*) OR (older NEXT (patient* OR people OR subject* OR age* OR adult* OR man OR men OR male* OR woman OR women OR female* OR population* OR person* OR individual*)) OR aging OR ageing OR senior* OR "late life"):ab,ti,kw AND (((alternative OR complementary OR traditional OR animal OR pet OR bee OR honey OR propolis OR leech OR physical OR manual OR manipulative OR dance OR music OR movement OR art OR energy OR spiritual OR clown OR humor OR humour OR laughter OR "bio resonance" OR bioresonance OR garden* OR horticultural OR nature OR reflex OR diet OR nutrition OR "non pharmacological" OR kinesis OR occupational OR meditative OR recreation OR exercise*) NEXT therap*) OR "exercise training" OR "spiritual healing" OR acupuncture OR acupressure OR bodywork OR Shiatsu OR apitherap* OR homeotherap* OR homeopath* OR hirudotherap* OR leeching OR physiotherap* OR massage OR osteopath* OR chiropra* OR chirotherap* OR massotherap* OR (masso NEXT therap*) OR reflexolog* OR kinesiotherap* OR pilates OR naturopath* OR dietary OR dietician* OR yoga OR "tai ji" OR "Taiji quan" OR Taijiquan OR "Tai Chi" OR "chi kung" OR chigung OR qigong OR "qi gong" OR psychotherap* OR hypnos* OR hypnotherap* OR meditation OR relaxation OR mindfulness OR (breathing NEXT exercise*) OR "guided imagery" OR reflexotherap* OR breathwork OR cupping OR Reiki OR iridology OR gelotherap* OR psychodermatology OR aromatherap* OR (essential NEXT oil*) OR phythotherap* OR clowntherap* OR ethnomedicin* OR hydrotherap* OR rehabilitation OR ((alternative OR complementary OR traditional OR African OR Chinese OR herbal OR Indian OR kampo OR Korean OR American OR Mongolian OR oriental OR Tibetan OR Arabic OR Islamic OR persian OR unani OR native OR indigenous OR naturopathic OR energy OR spiritual OR vibrational OR osteopathic OR "psycho cutaneous" OR psychocutaneous OR Integrative OR physical OR manipulative) NEXT medicine*)):ab,ti,kw |
| <b>Commentaires</b>  | Cochrane Database of Systematic Reviews - Issue 9 of 12, September 2023<br>Cochrane Central Register of Controlled Trials - Issue 8 of 12, August 2023<br><b>Ajouter le filtre de date manuellement</b>                                                                                                                                                                                                                                                                                                                                                                                                                                                                                                                                                                                                                                                                                                                                                                                                                                                                                                                                                                                                                                                                                                                                                                                                                                                                                                                                                                                                                                                                                                                                                                                                                                                                                                                                                                                                                                                                                                                                                                                                                                                                                                                                                 |
| <b>Réf. trouvée.</b> | 296 références trouvées le 20.09.2023<br>4 cochrane review<br>291 trials<br>1 editorial                                                                                                                                                                                                                                                                                                                                                                                                                                                                                                                                                                                                                                                                                                                                                                                                                                                                                                                                                                                                                                                                                                                                                                                                                                                                                                                                                                                                                                                                                                                                                                                                                                                                                                                                                                                                                                                                                                                                                                                                                                                                                                                                                                                                                                                                 |

### 3.2.7 Pubmed

|                  |                                                                                                                                                                                                                                                                                                                                                                                                                                                                                                                                                                                                                                                                                                                                                                                                                                                                                                                                                                                                                                                                                                                                                                                                                                                                                                                                                                                                                                                                                                                                                                                                                                                                                                                                                                                                                                                                                                                                                                      |
|------------------|----------------------------------------------------------------------------------------------------------------------------------------------------------------------------------------------------------------------------------------------------------------------------------------------------------------------------------------------------------------------------------------------------------------------------------------------------------------------------------------------------------------------------------------------------------------------------------------------------------------------------------------------------------------------------------------------------------------------------------------------------------------------------------------------------------------------------------------------------------------------------------------------------------------------------------------------------------------------------------------------------------------------------------------------------------------------------------------------------------------------------------------------------------------------------------------------------------------------------------------------------------------------------------------------------------------------------------------------------------------------------------------------------------------------------------------------------------------------------------------------------------------------------------------------------------------------------------------------------------------------------------------------------------------------------------------------------------------------------------------------------------------------------------------------------------------------------------------------------------------------------------------------------------------------------------------------------------------------|
| <b>Stratégie</b> | ((("Integrative care" OR "integrating care" OR "Integrative healthcare" OR "Integrative pathway*" OR "Integrated care" OR "Integrated healthcare" OR "Integrated delivery" OR "Integrated pathway*" OR "Integrated hospital care" OR "transition care" OR "transitional care" OR "clinical pathway*" OR "patient care plan*" OR ("multi disciplinary" OR multidisciplinary OR "inter professional" OR interprofessional OR interdisciplinary OR "inter disciplinary" OR multispeciality OR "multi speciality" OR multiagency OR "multi agency" OR interagency OR "inter agency" OR multiprofessional OR "multi professional" OR intersectoral OR "inter sectoral") AND (team* OR care OR healthcare OR collaboration OR intervention* OR management OR approach* OR program* OR treatment*)) OR handoff* OR "hand off*" OR "collaborative healthcare" OR "collaborative care") AND (hospital* OR inpatient*) AND (elder* OR eldest OR geriatr* OR "old aged" OR "oldest old*" OR "very old*" OR "older patient*" OR "older people" OR "older age*" OR "older adult*" OR "older man" OR "older men" OR "older woman" OR "older women" OR "older population*" OR "older person*" OR "older individual*" OR aging OR ageing OR senior* OR "late life") AND ("alternative therap*" OR "complementary therap*" OR "traditional therap*" OR "pet therap*" OR "physical therap*" OR "manual therap*" OR "manipulative therap*" OR "dance therap*" OR "music therap*" OR "movement therap*" OR "art therap*" OR "diet therap*" OR "nutrition therap*" OR "non pharmacological therap*" OR "kinesis therap*" OR "occupational therap*" OR "meditative therap*" OR "recreation therap*" OR "exercise therap*" OR "exercise training" OR acupuncture OR acupressure OR bodywork OR homeopath* OR physiotherap* OR massage OR osteopath* OR chiropra* OR kinesiotherap* OR naturopath* OR dietary OR dietician* OR yoga OR "tai ji" OR "Taiji quan" OR Taijiquan OR "Tai Chi" OR |
|------------------|----------------------------------------------------------------------------------------------------------------------------------------------------------------------------------------------------------------------------------------------------------------------------------------------------------------------------------------------------------------------------------------------------------------------------------------------------------------------------------------------------------------------------------------------------------------------------------------------------------------------------------------------------------------------------------------------------------------------------------------------------------------------------------------------------------------------------------------------------------------------------------------------------------------------------------------------------------------------------------------------------------------------------------------------------------------------------------------------------------------------------------------------------------------------------------------------------------------------------------------------------------------------------------------------------------------------------------------------------------------------------------------------------------------------------------------------------------------------------------------------------------------------------------------------------------------------------------------------------------------------------------------------------------------------------------------------------------------------------------------------------------------------------------------------------------------------------------------------------------------------------------------------------------------------------------------------------------------------|

|                      |                                                                                                                                                                                                                                                                                                                                                                                                                                                                                                                                                                                                                       |
|----------------------|-----------------------------------------------------------------------------------------------------------------------------------------------------------------------------------------------------------------------------------------------------------------------------------------------------------------------------------------------------------------------------------------------------------------------------------------------------------------------------------------------------------------------------------------------------------------------------------------------------------------------|
|                      | qigong OR "qi gong" OR psychotherap* OR meditation OR relaxation OR mindfulness OR "breathing exercise*" OR "guided imagery" OR Reiki OR psychodermatology OR aromatherap* OR "essential oil*" OR phytotherap* OR rehabilitation OR "alternative medicine" OR "complementary medicine" OR "traditional medicine" OR "Chinese medicine" OR "herbal medicine" OR "Integrative medicine" OR "physical medicine" OR "manipulative medicine")) NOT medline[ <i>sb</i> ] NOT (letter* OR news OR comment* OR editorial* OR congress* OR abstract* OR dissertation abstract* OR conference*)) AND (1990:2023[ <i>pdat</i> ]) |
| <b>Commentaires</b>  |                                                                                                                                                                                                                                                                                                                                                                                                                                                                                                                                                                                                                       |
| <b>Réf. trouvée.</b> | 495 références trouvées le 20.09.2023                                                                                                                                                                                                                                                                                                                                                                                                                                                                                                                                                                                 |

### 3.2.8 ProQuest Dissertations and Theses A&I

|                      |                                                                                                                                                                                                                                                                                                                                                                                                                                                                                                                                                                                                                                                                                                                                                                                                                                                                                                                                                                                                                                                                                                                                                                                                                                                                                                                                                                                                                                                                                                                                                                                                                                                                                                                                                                                                                                                                                                                                                                                                                                                                                                                                                                                                                                                                                                                                                                                                                                                                                           |
|----------------------|-------------------------------------------------------------------------------------------------------------------------------------------------------------------------------------------------------------------------------------------------------------------------------------------------------------------------------------------------------------------------------------------------------------------------------------------------------------------------------------------------------------------------------------------------------------------------------------------------------------------------------------------------------------------------------------------------------------------------------------------------------------------------------------------------------------------------------------------------------------------------------------------------------------------------------------------------------------------------------------------------------------------------------------------------------------------------------------------------------------------------------------------------------------------------------------------------------------------------------------------------------------------------------------------------------------------------------------------------------------------------------------------------------------------------------------------------------------------------------------------------------------------------------------------------------------------------------------------------------------------------------------------------------------------------------------------------------------------------------------------------------------------------------------------------------------------------------------------------------------------------------------------------------------------------------------------------------------------------------------------------------------------------------------------------------------------------------------------------------------------------------------------------------------------------------------------------------------------------------------------------------------------------------------------------------------------------------------------------------------------------------------------------------------------------------------------------------------------------------------------|
| <b>Stratégie</b>     | noft(((Integrat* N/1 (care OR healthcare OR delivery OR pathway* OR "hospital care")) OR "transition* care" OR "clinical pathway*" OR "patient care plan*" OR ((multi*disciplinary OR inter*professional OR inter*disciplinary OR multi*speciality OR multi*agency OR inter*agency OR multi*professional OR inter*sectoral) N/1 (team* OR care OR healthcare OR collaboration OR intervention* OR management OR approach* OR program* OR treatment*)) OR hand*off* OR ((coordinat* OR collaborat*) N/1 (care OR service* OR program* OR approach*)) AND (hospital* OR inpatient*) AND ((older N/1 (patient* OR people OR subject* OR age* OR adult* OR m?n OR male* OR wom?n OR female* OR population* OR person* OR individual*)) OR aging OR ageing OR senior* OR "late life") AND (((alternative OR complementary OR traditional OR animal OR pet OR bee OR honey OR propolis OR leech OR physical OR manual OR manipulative OR dance OR music OR movement OR art OR energy OR spiritual OR clown OR humor OR humour OR laughter OR bio-resonance OR bioresonance OR garden* OR horticultural OR nature OR reflex OR diet OR nutrition OR "non-pharmacological" OR kinesis OR occupational OR meditative OR recreation OR exercise*) N/1 therap*) OR "exercise training" OR "spiritual healing" OR acupuncture OR acupressure OR bodywork OR Shiatsu OR apitherap* OR homeotherap* OR homeopath* OR hirudotherap* OR leeching OR physiotherap* OR massage OR osteopath* OR chiropra* OR chirotherap* OR masso?therap* OR reflexolog* OR kinesiotherap* OR pilates OR naturopath* OR dietary OR dietician* OR yoga OR "tai ji" OR Taiji*quan OR "Tai Chi" OR "chi kung" OR chigung OR qi*gong OR psychotherap* OR hypnos* OR hypnotherap* OR meditation OR relaxation OR mindfulness OR "breathing exercise*" OR "guided imagery" OR reflexotherap* OR breathwork OR cupping OR Reiki OR iridology OR gelototherap* OR psychodermatology OR aromatherap* OR "essential oil*" OR phytotherap* OR clowntherap* OR ethnomedicin*OR hydrotherap* OR rehabilitation OR ((alternative OR complementary OR traditional OR African OR Chinese OR herbal OR Indian OR kampo OR Korean OR American OR Mongolian OR oriental OR Tibetan OR Arabic OR Islamic OR persian OR unani OR native OR indigenous OR naturopathic OR energy OR spiritual OR vibrational OR osteopathic OR psycho-cutaneous OR psychocutaneous OR Integrative OR physical OR manipulative) N/2 medicine*)) AND YR(1990-3000) |
| <b>Commentaires</b>  | <b>Ajouter le filtre thèses de doctorat</b>                                                                                                                                                                                                                                                                                                                                                                                                                                                                                                                                                                                                                                                                                                                                                                                                                                                                                                                                                                                                                                                                                                                                                                                                                                                                                                                                                                                                                                                                                                                                                                                                                                                                                                                                                                                                                                                                                                                                                                                                                                                                                                                                                                                                                                                                                                                                                                                                                                               |
| <b>Réf. trouvée.</b> | 55 références trouvées le 20.09.2023                                                                                                                                                                                                                                                                                                                                                                                                                                                                                                                                                                                                                                                                                                                                                                                                                                                                                                                                                                                                                                                                                                                                                                                                                                                                                                                                                                                                                                                                                                                                                                                                                                                                                                                                                                                                                                                                                                                                                                                                                                                                                                                                                                                                                                                                                                                                                                                                                                                      |

### 3.2.9 CAMBase Complementary and Alternative Medicine

|                      |                                                                                                                                                      |
|----------------------|------------------------------------------------------------------------------------------------------------------------------------------------------|
| <b>Stratégie</b>     | Integrated health care inpatient older complementary therapy                                                                                         |
| <b>Commentaires</b>  | <a href="http://cambase.dmz.uni-wh.de/opencam/index_en.html">http://cambase.dmz.uni-wh.de/opencam/index_en.html</a><br><b>Recherche par subjects</b> |
| <b>Réf. trouvée.</b> | 148 références trouvées le 21.09.2023                                                                                                                |

### 3.3 Résultats

| Base de données                         | Date de la recherche | Nombre de références... |                           |
|-----------------------------------------|----------------------|-------------------------|---------------------------|
|                                         |                      | ...trouvées...          | ...et après dédoublonnage |
| Medline OVID SP                         | 20.09.2023           | 3166                    | 1861                      |
| Embase.com                              | 20.09.2023           | 3156                    | 2799                      |
| PubMed                                  | 20.09.2023           | 495                     | 395                       |
| CINAHL EBSCO                            | 20.09.2023           | 2942                    | 2851                      |
| PsycINFO OVID SP                        | 20.09.2023           | 159                     | 52                        |
| Cochrane Library<br>Wiley               | 20.09.2023           | 295                     | 241                       |
| Web of Science –<br>Core collection     | 20.09.2023           | 1458                    | 817                       |
| ProQuest<br>Dissertations and<br>Theses | 20.09.2023           | 55                      | 50                        |
| <u>Total</u>                            |                      | <u>11726</u>            | <u>9066</u>               |

## 4 Recherches ciblant l'admission, la réadmission et la sortie

### 4.1 Vocabulaire

| Concepts                                | Integrated care                                                                                                                                                                                                                                                                                                                                                                                                                                                                                                                                                 | Hospitalisation                                                                                        | aged                                                                                                                                                                                                                                                                      | Complementary therapy                                                                                                                                                                                                                                                                                                                                                                                                                                                                                                                                                                                                                                                                                                                                                                                                                                                                                                                                                                                                                                                                                                                                                                                                                                                                                                                                                                                                                                                                                                                                                                                                                                                                  |
|-----------------------------------------|-----------------------------------------------------------------------------------------------------------------------------------------------------------------------------------------------------------------------------------------------------------------------------------------------------------------------------------------------------------------------------------------------------------------------------------------------------------------------------------------------------------------------------------------------------------------|--------------------------------------------------------------------------------------------------------|---------------------------------------------------------------------------------------------------------------------------------------------------------------------------------------------------------------------------------------------------------------------------|----------------------------------------------------------------------------------------------------------------------------------------------------------------------------------------------------------------------------------------------------------------------------------------------------------------------------------------------------------------------------------------------------------------------------------------------------------------------------------------------------------------------------------------------------------------------------------------------------------------------------------------------------------------------------------------------------------------------------------------------------------------------------------------------------------------------------------------------------------------------------------------------------------------------------------------------------------------------------------------------------------------------------------------------------------------------------------------------------------------------------------------------------------------------------------------------------------------------------------------------------------------------------------------------------------------------------------------------------------------------------------------------------------------------------------------------------------------------------------------------------------------------------------------------------------------------------------------------------------------------------------------------------------------------------------------|
| <b>Mots libres</b><br>Syntaxe<br>Embase | (Integrat* NEXT/1 (care OR healthcare OR delivery OR pathway* OR "hospital care")) OR "transition* care" OR "clinical pathway*" OR "patient care plan*" OR ((multi\$disciplinary OR inter\$professional OR inter\$disciplinary OR multi\$speciality OR multi\$agency OR inter\$agency OR multi\$professional OR inter\$sectoral) NEXT/1 (team* OR care OR healthcare OR collaboration OR intervention* OR management OR approach* OR program* OR treatment*)) OR hand\$off* OR ((coordinat* OR collaborat*) NEXT/1 (care OR service* OR program* OR approach*)) | "discharge planning" OR (patient NEXT/1 (admission OR discharge)) OR readmission* OR rehospitalization | elder* OR eldest OR geriatr* OR "old aged" OR "oldest old*" OR "very old*" OR (older NEXT/1 (patient* OR people OR subject* OR age* OR adult* OR m?n OR male* OR wom?n OR female* OR population* OR person* OR individual*)) OR aging OR ageing OR senior* OR "late life" | ((alternative OR complementary OR traditional OR animal OR pet OR bee OR honey OR propolis OR leech OR physical OR manual OR manipulative OR dance OR music OR movement OR art OR energy OR spiritual OR clown OR humor OR humour OR laughter OR bio-resonance OR bioresonance OR garden* OR horticultural OR nature OR reflex OR diet OR nutrition OR "non-pharmacological" OR kinesis OR occupational OR meditative OR recreation OR exercise*) NEXT/1 therap*) OR "exercise training" OR "spiritual healing" OR acupuncture OR acupressure OR bodywork OR Shiatsu OR apitherap* OR homeotherap* OR homeopath* OR hirudotherap* OR leeching OR physiotherap* OR massage OR osteopath* OR chiropra* OR chirotherap* OR masso?therap* OR reflexolog* OR kinesiotherap* OR pilates OR naturopath* OR dietary OR dietician* OR yoga OR "tai ji" OR Taiji\$quan OR "Tai Chi" OR "chi kung" OR chigung OR qi?gong OR psychotherap* OR hypnos* OR hypnotherap* OR meditation OR relaxation OR mindfulness OR "breathing exercise*" OR "guided imagery" OR reflexotherap* OR breathwork OR cupping OR Reiki OR iridology OR gelotherap* OR psychodermatology OR aromatherap* OR "essential oil*" OR phytotherap* OR clowntherap* OR ethnomedicin* OR hydrotherap* OR rehabilitation OR ((alternative OR complementary OR traditional OR African OR Chinese OR herbal OR Indian OR kampo OR Korean OR American OR Mongolian OR oriental OR Tibetan OR Arabic OR Islamic OR persian OR unani OR native OR indigenous OR naturopathic OR energy OR spiritual OR vibrational OR osteopathic OR psycho-cutaneous OR psychocutaneous OR Integrative OR physical OR manipulative) NEXT/2 medicine*) |
| <b>Emtree</b>                           | 'integrated health care system'/de OR 'patient care team'/de OR 'collaborative care team'/de OR 'multidisciplinary team'/de OR 'transitional care'/de OR 'clinical handover'/de OR 'patient care planning'/de OR 'clinical pathway'/de OR 'health service'/de OR 'patient                                                                                                                                                                                                                                                                                       | 'hospital discharge'/exp OR 'hospital readmission'/de OR 'hospital admission'/de                       | 'aged'/exp OR 'elderly care'/exp OR 'geriatric patient'/de OR 'geriatrics'/exp OR 'geriatric care'/exp                                                                                                                                                                    | 'alternative medicine'/exp OR 'integrative medicine'/exp OR 'meditation'/exp OR 'psychotherapy'/exp OR 'traditional medicine'/exp OR 'medicinal plant'/exp OR 'therapy'/de OR 'acupuncture'/exp OR 'animal assisted therapy'/exp OR 'apitherapy'/de OR 'homeopathy'/de OR 'leeching'/de OR 'physical medicine'/exp OR 'diet therapy'/de OR 'rehabilitation'/exp                                                                                                                                                                                                                                                                                                                                                                                                                                                                                                                                                                                                                                                                                                                                                                                                                                                                                                                                                                                                                                                                                                                                                                                                                                                                                                                        |

|               |                                                                                                                                                                                                                                                                                                                                                |                                                                                                      |                                                                                                                                                  |                                                                                                                                                                                                                                                     |
|---------------|------------------------------------------------------------------------------------------------------------------------------------------------------------------------------------------------------------------------------------------------------------------------------------------------------------------------------------------------|------------------------------------------------------------------------------------------------------|--------------------------------------------------------------------------------------------------------------------------------------------------|-----------------------------------------------------------------------------------------------------------------------------------------------------------------------------------------------------------------------------------------------------|
|               | assessment'/de OR 'hospital service'/exp OR 'health care delivery'/de OR 'interhospital cooperation'/de OR 'intersectoral collaboration'/de                                                                                                                                                                                                    |                                                                                                      |                                                                                                                                                  |                                                                                                                                                                                                                                                     |
| <b>MeSH</b>   | exp Delivery of Health Care, Integrated/ OR Continuity of Patient Care/ OR Transitional Care/ OR Patient Handoff/ OR Patient Care Team/ OR exp Patient Care Planning/ OR Health Services/ OR Delivery of Health Care/ OR exp Intersectoral Collaboration/ OR exp Interprofessional Relations/                                                  | Patient Admission/ OR Patient Discharge/ OR Patient Readmission/ OR Patient Transfer/                | exp Aged/ OR exp Geriatrics/ OR exp Geriatric Nursing/ OR exp Geriatric Assessment/ OR exp Geriatric Psychiatry/                                 | exp Complementary Therapies/ OR exp Integrative Medicine/ OR exp Physical Therapy Modalities/ OR exp Psychotherapy/ OR exp plants, medicinal/ OR Therapeutics/ OR exp Apitherapy/ OR exp Leeching/ OR exp Nutrition Therapy/ OR exp Rehabilitation/ |
| <b>CINAHL</b> | MH "Health Care Delivery, Integrated" OR MH "Transitional Care" OR MH "Hand Off (Patient Safety)" OR MH "Multidisciplinary Care Team" OR MH "Health Services" OR MH "Patient Assessment+" OR MH "Health Care Delivery" OR MH "Continuity of Patient Care" OR MH "Patient Care Plans" OR MH "Critical Path" OR MH "Interprofessional Relations" | MH "Transfer, Intrahospital" OR MH "Patient Admission" OR MH "Patient Discharge" OR MH "Readmission" | MH "Aged+" OR MH "Gerontologic Nursing+" OR MH "Geriatric Assessment+" OR MH "Geriatrics" OR MH "Geriatric Psychiatry" OR MH "Gerontologic Care" | MH "Alternative Therapies+" OR MH "Psychotherapy+" OR MH "Plants, Medicinal+" OR MH "Therapeutics" OR MH "Diet Therapy+" OR MH "Physical Medicine" OR MH "Rehabilitation+"                                                                          |

### Limitations

Date de publication : 1990 à 2023

Type de publications non comprise : NOT (letter\* OR news OR comment\* OR editorial\* OR congres\* OR abstract\* OR dissertation abstract\* OR conference\*)

## 4.2 Stratégies de recherche

### 4.2.1 Embase.com

|           |                                                                                                                                                                                                                                                                                                                                                                                                                                                                                                                                                                                                                                                                                                                                                                                                                                                                                                                                                                                                                                                                                                                                                                                                                                                                                                                                                                                                                                                                                                                                                                                                                                                                                                                                                                                                                                                                                                                                                                                                                                                                                                                                                                                                                                                                                                                                                                                                                                                                                                                                                                                                                                                                                                                                                                                                                                                                                                                                                                                                                                                                                                                                                                                                                                                                                                                                                                                                                                                                                                                                                                                                                                                                                                                                                                                                                                                                                                                                                                                                                                                                                                                                                                                                                                                                                                                                                                                                                                                                                                                                                                                                                                                                                                                                                                                                                                                                                                                                                                                                                                                                                                                                                                                                                                                                                                                                                                                                                                                                                                                                                                                                                                                                                                                                                                                                                                                                                             |
|-----------|---------------------------------------------------------------------------------------------------------------------------------------------------------------------------------------------------------------------------------------------------------------------------------------------------------------------------------------------------------------------------------------------------------------------------------------------------------------------------------------------------------------------------------------------------------------------------------------------------------------------------------------------------------------------------------------------------------------------------------------------------------------------------------------------------------------------------------------------------------------------------------------------------------------------------------------------------------------------------------------------------------------------------------------------------------------------------------------------------------------------------------------------------------------------------------------------------------------------------------------------------------------------------------------------------------------------------------------------------------------------------------------------------------------------------------------------------------------------------------------------------------------------------------------------------------------------------------------------------------------------------------------------------------------------------------------------------------------------------------------------------------------------------------------------------------------------------------------------------------------------------------------------------------------------------------------------------------------------------------------------------------------------------------------------------------------------------------------------------------------------------------------------------------------------------------------------------------------------------------------------------------------------------------------------------------------------------------------------------------------------------------------------------------------------------------------------------------------------------------------------------------------------------------------------------------------------------------------------------------------------------------------------------------------------------------------------------------------------------------------------------------------------------------------------------------------------------------------------------------------------------------------------------------------------------------------------------------------------------------------------------------------------------------------------------------------------------------------------------------------------------------------------------------------------------------------------------------------------------------------------------------------------------------------------------------------------------------------------------------------------------------------------------------------------------------------------------------------------------------------------------------------------------------------------------------------------------------------------------------------------------------------------------------------------------------------------------------------------------------------------------------------------------------------------------------------------------------------------------------------------------------------------------------------------------------------------------------------------------------------------------------------------------------------------------------------------------------------------------------------------------------------------------------------------------------------------------------------------------------------------------------------------------------------------------------------------------------------------------------------------------------------------------------------------------------------------------------------------------------------------------------------------------------------------------------------------------------------------------------------------------------------------------------------------------------------------------------------------------------------------------------------------------------------------------------------------------------------------------------------------------------------------------------------------------------------------------------------------------------------------------------------------------------------------------------------------------------------------------------------------------------------------------------------------------------------------------------------------------------------------------------------------------------------------------------------------------------------------------------------------------------------------------------------------------------------------------------------------------------------------------------------------------------------------------------------------------------------------------------------------------------------------------------------------------------------------------------------------------------------------------------------------------------------------------------------------------------------------------------------------------------------------|
| Stratégie | <p>((('integrated health care system'/de OR 'patient care team'/de OR 'collaborative care team'/de OR 'multidisciplinary team'/de OR 'transitional care'/de OR 'clinical handover'/de OR 'patient care planning'/de OR 'clinical pathway'/de OR 'health service'/de OR 'patient assessment'/de OR 'hospital service'/exp OR 'health care delivery'/de OR 'interhospital cooperation'/de OR 'intersectoral collaboration'/de OR ((Integrat* NEXT/1 (care OR healthcare OR delivery OR pathway* OR "hospital care")) OR "transition* care" OR "clinical pathway*" OR "patient care plan*" OR ((multi\$disciplinary OR inter\$professional OR inter\$disciplinary OR multi\$speciality OR multi\$agency OR inter\$agency OR multi\$professional OR inter\$sectoral) NEXT/1 (team* OR care OR healthcare OR collaboration OR intervention* OR management OR approach* OR program* OR treatment*)) OR hand\$off* OR ((coordinat* OR collaborat*) NEXT/1 (care OR service* OR program* OR approach*)):ab,ti) AND ('hospital discharge'/exp OR 'hospital readmission'/de OR 'hospital admission'/de OR ("discharge planning" OR (patient NEXT/1 (admission OR discharge)) OR readmission* OR rehospitalization):ab,ti) AND ('aged'/exp OR 'elderly care'/exp OR 'geriatric patient'/de OR 'geriatrics'/exp OR 'geriatric care'/exp OR elder* OR eldest OR geriatr* OR "old aged" OR "oldest old*" OR "very old*" OR (older NEXT/1 (patient* OR people OR subject* OR age* OR adult* OR m?n OR male* OR wom?n OR female* OR population* OR person* OR individual*)) OR aging OR ageing OR senior* OR "late life"):ab,ti) AND ('alternative medicine'/exp OR 'integrative medicine'/exp OR 'meditation'/exp OR 'psychotherapy'/exp OR 'traditional medicine'/exp OR 'medicinal plant'/exp OR 'therapy'/de OR 'acupuncture'/exp OR 'animal assisted therapy'/exp OR 'apitherapy'/de OR 'homeopathy'/de OR 'leeching'/de OR 'physical medicine'/exp OR 'diet therapy'/de OR 'rehabilitation'/exp OR (((alternative OR complementary OR traditional OR animal OR pet OR bee OR honey OR propolis OR leech OR physical OR manual OR manipulative OR dance OR music OR movement OR art OR energy OR spiritual OR clown OR humor OR humour OR laughter OR bio-resonance OR bioresonance OR garden* OR horticultural OR nature OR reflex OR diet OR nutrition OR "non-pharmacological" OR kinesis OR occupational OR meditative OR recreation OR exercise*) NEXT/1 therap*) OR "exercise training" OR "spiritual healing" OR acupuncture OR acupressure OR bodywork OR Shiatsu OR apitherap* OR homeotherap* OR homeopath* OR hirudotherap* OR leeching OR physiotherap* OR massage OR osteopath* OR chiropra* OR chirotherap* OR masso?therap* OR reflexolog* OR kinesiotherap* OR pilates OR naturopath* OR dietary OR dietician* OR yoga OR "tai ji" OR Taiji\$quan OR "Tai Chi" OR "chi kung" OR chigung OR qi?gong OR psychotherap* OR hypnos* OR hypnotherap* OR meditation OR relaxation OR mindfulness OR "breathing exercise*" OR "guided imagery" OR reflexotherap* OR breathwork OR cupping OR Reiki OR iridology OR gelototherap* OR psychodermatology OR aromatherap* OR "essential oil*" OR phytotherap* OR clowntherap* OR ethnomedicin* OR hydrotherap* OR rehabilitation OR ((alternative OR complementary OR traditional OR African OR Chinese OR herbal OR Indian OR kampo OR Korean OR American OR Mongolian OR oriental OR Tibetan OR Arabic OR Islamic OR persian OR unani OR native OR indigenous OR naturopathic OR energy OR spiritual OR vibrational OR osteopathic OR psycho-cutaneous OR psychocutaneous OR Integrative OR physical OR manipulative) NEXT/2 medicine*)):ab,ti) AND ([1990-2023]/py)) NOT ((([Conference Abstract]/lim OR [Letter]/lim OR [Note]/lim OR [Editorial]/lim))) NOT ((('integrated health care system'/de OR 'patient care team'/de OR 'collaborative care team'/de OR 'multidisciplinary team'/de OR 'transitional care'/de OR 'clinical handover'/de OR 'patient care planning'/de OR 'clinical pathway'/de OR 'health service'/de OR 'patient assessment'/de OR 'hospital service'/exp OR 'health care delivery'/de OR 'interhospital cooperation'/de OR 'intersectoral collaboration'/de OR ((integrat* NEXT/1 (care OR healthcare OR delivery OR pathway* OR "hospital care")):ab,ti) OR 'transition* care':ab,ti OR 'clinical pathway*':ab,ti OR 'patient care plan*':ab,ti OR (((multi\$disciplinary OR inter\$professional OR inter\$disciplinary OR multi\$speciality OR multi\$agency OR inter\$agency OR multi\$professional OR inter\$sectoral) NEXT/1 (team* OR care OR healthcare OR collaboration OR intervention* OR management OR approach* OR program* OR treatment*)):ab,ti) OR hand\$off*:ab,ti OR (((coordinat* OR collaborat*) NEXT/1 (care OR service* OR program* OR approach*)):ab,ti) AND ('hospitalization'/de OR 'hospital patient'/de OR 'length of stay'/de OR hospital*:ab,ti OR inpatient*:ab,ti) AND ('aged'/exp OR 'elderly care'/exp OR 'geriatric patient'/de OR 'geriatrics'/exp OR 'geriatric care'/exp OR elder*:ab,ti OR eldest:ab,ti OR geriatr*:ab,ti OR 'old aged':ab,ti OR 'oldest old*':ab,ti OR 'very old*':ab,ti OR ((older NEXT/1 (patient* OR people OR subject* OR age* OR adult* OR m?n OR male* OR wom?n OR female* OR population* OR person* OR individual*)):ab,ti) OR aging:ab,ti OR ageing:ab,ti OR senior*:ab,ti OR 'late life':ab,ti) AND ('alternative medicine'/exp OR 'integrative medicine'/exp OR 'meditation'/exp OR 'psychotherapy'/exp OR 'traditional medicine'/exp OR 'medicinal plant'/exp OR 'therapy'/de OR 'acupuncture'/exp OR 'animal assisted therapy'/exp OR 'apitherapy'/de OR 'homeopathy'/de OR 'leeching'/de OR 'physical medicine'/exp OR 'diet therapy'/de OR 'rehabilitation'/exp OR (((alternative OR complementary OR traditional OR animal OR pet OR bee OR</p> |
|-----------|---------------------------------------------------------------------------------------------------------------------------------------------------------------------------------------------------------------------------------------------------------------------------------------------------------------------------------------------------------------------------------------------------------------------------------------------------------------------------------------------------------------------------------------------------------------------------------------------------------------------------------------------------------------------------------------------------------------------------------------------------------------------------------------------------------------------------------------------------------------------------------------------------------------------------------------------------------------------------------------------------------------------------------------------------------------------------------------------------------------------------------------------------------------------------------------------------------------------------------------------------------------------------------------------------------------------------------------------------------------------------------------------------------------------------------------------------------------------------------------------------------------------------------------------------------------------------------------------------------------------------------------------------------------------------------------------------------------------------------------------------------------------------------------------------------------------------------------------------------------------------------------------------------------------------------------------------------------------------------------------------------------------------------------------------------------------------------------------------------------------------------------------------------------------------------------------------------------------------------------------------------------------------------------------------------------------------------------------------------------------------------------------------------------------------------------------------------------------------------------------------------------------------------------------------------------------------------------------------------------------------------------------------------------------------------------------------------------------------------------------------------------------------------------------------------------------------------------------------------------------------------------------------------------------------------------------------------------------------------------------------------------------------------------------------------------------------------------------------------------------------------------------------------------------------------------------------------------------------------------------------------------------------------------------------------------------------------------------------------------------------------------------------------------------------------------------------------------------------------------------------------------------------------------------------------------------------------------------------------------------------------------------------------------------------------------------------------------------------------------------------------------------------------------------------------------------------------------------------------------------------------------------------------------------------------------------------------------------------------------------------------------------------------------------------------------------------------------------------------------------------------------------------------------------------------------------------------------------------------------------------------------------------------------------------------------------------------------------------------------------------------------------------------------------------------------------------------------------------------------------------------------------------------------------------------------------------------------------------------------------------------------------------------------------------------------------------------------------------------------------------------------------------------------------------------------------------------------------------------------------------------------------------------------------------------------------------------------------------------------------------------------------------------------------------------------------------------------------------------------------------------------------------------------------------------------------------------------------------------------------------------------------------------------------------------------------------------------------------------------------------------------------------------------------------------------------------------------------------------------------------------------------------------------------------------------------------------------------------------------------------------------------------------------------------------------------------------------------------------------------------------------------------------------------------------------------------------------------------------------------------------------------|

|                       |                                                                                                                                                                                                                                                                                                                                                                                                                                                                                                                                                                                                                                                                                                                                                                                                                                                                                                                                                                                                                                                                                                                                                                                                                                                                                                                                                                                                                                                                                                                                                                                                                                                                                                                                                                                                                                                                                                                                                                                                                                                                              |
|-----------------------|------------------------------------------------------------------------------------------------------------------------------------------------------------------------------------------------------------------------------------------------------------------------------------------------------------------------------------------------------------------------------------------------------------------------------------------------------------------------------------------------------------------------------------------------------------------------------------------------------------------------------------------------------------------------------------------------------------------------------------------------------------------------------------------------------------------------------------------------------------------------------------------------------------------------------------------------------------------------------------------------------------------------------------------------------------------------------------------------------------------------------------------------------------------------------------------------------------------------------------------------------------------------------------------------------------------------------------------------------------------------------------------------------------------------------------------------------------------------------------------------------------------------------------------------------------------------------------------------------------------------------------------------------------------------------------------------------------------------------------------------------------------------------------------------------------------------------------------------------------------------------------------------------------------------------------------------------------------------------------------------------------------------------------------------------------------------------|
|                       | <p>honey OR propolis OR leech OR physical OR manual OR manipulative OR dance OR music OR movement OR art OR energy OR spiritual OR clown OR humor OR humour OR laughter OR 'bio resonance' OR bioresonance OR garden* OR horticultural OR nature OR reflex OR diet OR nutrition OR 'non-pharmacological' OR kinesis OR occupational OR meditative OR recreation OR exercise*) NEXT/1 therap*):ab,ti) OR 'exercise training':ab,ti OR 'spiritual healing':ab,ti OR acupuncture:ab,ti OR acupressure:ab,ti OR bodywork:ab,ti OR shiatsu:ab,ti OR apitherap*:ab,ti OR homeotherap*:ab,ti OR homeopath*:ab,ti OR hirudotherap*:ab,ti OR leeching:ab,ti OR physiotherap*:ab,ti OR massage:ab,ti OR osteopath*:ab,ti OR chiropra*:ab,ti OR chirotherap*:ab,ti OR masso?therap*:ab,ti OR reflexolog*:ab,ti OR kinesiotherap*:ab,ti OR pilates:ab,ti OR naturopath*:ab,ti OR dietary:ab,ti OR dietician*:ab,ti OR yoga:ab,ti OR 'tai ji':ab,ti OR taiji\$quan:ab,ti OR 'tai chi':ab,ti OR 'chi kung':ab,ti OR chigung:ab,ti OR qi#gong:ab,ti OR psychotherap*:ab,ti OR hypnos*:ab,ti OR hypnotherap*:ab,ti OR meditation:ab,ti OR relaxation:ab,ti OR mindfulness:ab,ti OR 'breathing exercise*':ab,ti OR 'guided imagery':ab,ti OR reflexotherap*:ab,ti OR breathwork:ab,ti OR cupping:ab,ti OR reiki:ab,ti OR iridology:ab,ti OR gelototherap*:ab,ti OR psychodermatology:ab,ti OR aromatherap*:ab,ti OR 'essential oil*':ab,ti OR phythotherap*:ab,ti OR clowntherap*:ab,ti OR ethnomedicin*or:ab,ti) AND hydrotherap*:ab,ti) OR rehabilitation:ab,ti OR (((alternative OR complementary OR traditional OR african OR chinese OR herbal OR indian OR kampo OR korean OR american OR mongolian OR oriental OR tibetan OR arabic OR islamic OR persian OR unani OR native OR indigenous OR naturopathic OR energy OR spiritual OR vibrational OR osteopathic OR 'psycho cutaneous' OR psychocutaneous OR integrative OR physical OR manipulative) NEXT/2 medicine*):ab,ti) AND [1990-2023]/py NOT ([conference abstract]/lim OR [letter]/lim OR [note]/lim OR [editorial]/lim))</p> |
| <b>Commentaires</b>   |                                                                                                                                                                                                                                                                                                                                                                                                                                                                                                                                                                                                                                                                                                                                                                                                                                                                                                                                                                                                                                                                                                                                                                                                                                                                                                                                                                                                                                                                                                                                                                                                                                                                                                                                                                                                                                                                                                                                                                                                                                                                              |
| <b>Réf. trouvées.</b> | 223 références trouvées le 20.09.2023                                                                                                                                                                                                                                                                                                                                                                                                                                                                                                                                                                                                                                                                                                                                                                                                                                                                                                                                                                                                                                                                                                                                                                                                                                                                                                                                                                                                                                                                                                                                                                                                                                                                                                                                                                                                                                                                                                                                                                                                                                        |

#### 4.2.2 Medline Ovid SP

|                  |                                                                                                                                                                                                                                                                                                                                                                                                                                                                                                                                                                                                                                                                                                                                                                                                                                                                                                                                                                                                                                                                                                                                                                                                                                                                                                                                                                                                                                                                                                                                                                                                                                                                                                                                                                                                                                                                                                                                                                                                                                                                                                                                                                                                                                                                                                                                                                                                                                                                                                                                                                                                                                                                                                                                                                                                                                                                                                                                                                                                                                                                                                                                                                                                                                                                                                                                                                                                                                                         |
|------------------|---------------------------------------------------------------------------------------------------------------------------------------------------------------------------------------------------------------------------------------------------------------------------------------------------------------------------------------------------------------------------------------------------------------------------------------------------------------------------------------------------------------------------------------------------------------------------------------------------------------------------------------------------------------------------------------------------------------------------------------------------------------------------------------------------------------------------------------------------------------------------------------------------------------------------------------------------------------------------------------------------------------------------------------------------------------------------------------------------------------------------------------------------------------------------------------------------------------------------------------------------------------------------------------------------------------------------------------------------------------------------------------------------------------------------------------------------------------------------------------------------------------------------------------------------------------------------------------------------------------------------------------------------------------------------------------------------------------------------------------------------------------------------------------------------------------------------------------------------------------------------------------------------------------------------------------------------------------------------------------------------------------------------------------------------------------------------------------------------------------------------------------------------------------------------------------------------------------------------------------------------------------------------------------------------------------------------------------------------------------------------------------------------------------------------------------------------------------------------------------------------------------------------------------------------------------------------------------------------------------------------------------------------------------------------------------------------------------------------------------------------------------------------------------------------------------------------------------------------------------------------------------------------------------------------------------------------------------------------------------------------------------------------------------------------------------------------------------------------------------------------------------------------------------------------------------------------------------------------------------------------------------------------------------------------------------------------------------------------------------------------------------------------------------------------------------------------------|
| <b>Stratégie</b> | <p>((((exp "Delivery of Health Care, Integrated"/ OR "Continuity of Patient Care"/ OR "Transitional Care"/ OR "Patient Handoff"/ OR "Patient Care Team"/ OR exp "Patient Care Planning"/ OR "Health Services"/ OR "Delivery of Health Care"/ OR exp "Intersectoral Collaboration"/ OR exp "Interprofessional Relations"/ OR ((Integrat* ADJ (care OR healthcare OR delivery OR pathway* OR "hospital care"))) OR "transition* care" OR "clinical pathway*" OR "patient care plan*" OR ((multi?disciplinary OR inter?professional OR inter?disciplinary OR multi?speciality OR multi?agency OR inter?agency OR multi?professional OR inter?sectoral) ADJ (team? OR care OR healthcare OR collaboration OR intervention* OR management OR approach* OR program* OR treatment*)) OR hand?off* OR ((coordinat* OR collaborat*) ADJ (care OR service* OR program* OR approach*))).ab,ti.) AND (Patient Admission/ OR Patient Discharge/ OR Patient Readmission/ OR Patient Transfer/ OR ("discharge planning" OR "patient admission" OR "patient discharge" OR readmission* OR rehospitization).ab,ti.) AND (exp "Aged"/ OR exp "Geriatrics"/ OR exp "Geriatric Nursing"/ OR exp "Geriatric Assessment"/ OR exp "Geriatric Psychiatry"/ OR (elder* OR eldest OR geriatr* OR "old aged" OR "oldest old*" OR "very old*" OR (older ADJ (patient* OR people OR subject* OR age* OR adult* OR man OR men OR male* OR woman OR women OR female* OR population* OR person* OR individual*)) OR aging OR ageing OR senior* OR "late life").ab,ti.) AND (exp "Complementary Therapies"/ OR exp "Integrative Medicine"/ OR exp "Physical Therapy Modalities"/ OR exp "Psychotherapy"/ OR exp "plants, medicinal"/ OR "Therapeutics"/ OR exp "Apitherapy"/ OR exp "Leeching"/ OR exp "Nutrition Therapy"/ OR exp "Rehabilitation"/ OR (((alternative OR complementary OR traditional OR animal OR pet OR bee OR honey OR propolis OR leech OR physical OR manual OR manipulative OR dance OR music OR movement OR art OR energy OR spiritual OR clown OR humor OR humour OR laughter OR bio-resonance OR bioresonance OR garden* OR horticultural OR nature OR reflex OR diet OR nutrition OR "non-pharmacological" OR kinesis OR occupational OR meditative OR recreation) ADJ therap*) OR "exercise training" OR "spiritual healing" OR acupuncture OR acupressure OR bodywork OR Shiatsu OR apitherap* OR homeotherap* OR homeopath* OR hirudotherap* OR leeching OR physiotherap* OR massage OR osteopath* OR chiropra* OR chirotherap* OR masso?therap* OR reflexolog* OR kinesiotherap* OR pilates OR naturopath* OR dietary OR dietician* OR yoga OR "tai ji" OR Taiji?quan OR "Tai Chi" OR "chi kung" OR chigung OR qi#gong OR psychotherap* OR hypnos* OR hypnotherap* OR meditation OR relaxation OR mindfulness OR "breathing exercise*" OR "guided imagery" OR reflexotherap* OR breathwork OR cupping OR Reiki OR iridology OR gelototherap* OR psychodermatology OR aromatherap* OR "essential oil*" OR phythotherap* OR clowntherap* OR ethnomedicin*OR hydrotherap* OR rehabilitation OR ((alternative OR complementary OR traditional OR African OR Chinese OR herbal OR Indian OR kampo OR Korean OR American OR Mongolian OR oriental OR Tibetan OR Arabic OR Islamic OR persian OR unani OR native OR indigenous OR naturopathic OR energy OR spiritual OR vibrational OR osteopathic OR psycho-cutaneous OR psychocutaneous OR Integrative OR</p> |
|------------------|---------------------------------------------------------------------------------------------------------------------------------------------------------------------------------------------------------------------------------------------------------------------------------------------------------------------------------------------------------------------------------------------------------------------------------------------------------------------------------------------------------------------------------------------------------------------------------------------------------------------------------------------------------------------------------------------------------------------------------------------------------------------------------------------------------------------------------------------------------------------------------------------------------------------------------------------------------------------------------------------------------------------------------------------------------------------------------------------------------------------------------------------------------------------------------------------------------------------------------------------------------------------------------------------------------------------------------------------------------------------------------------------------------------------------------------------------------------------------------------------------------------------------------------------------------------------------------------------------------------------------------------------------------------------------------------------------------------------------------------------------------------------------------------------------------------------------------------------------------------------------------------------------------------------------------------------------------------------------------------------------------------------------------------------------------------------------------------------------------------------------------------------------------------------------------------------------------------------------------------------------------------------------------------------------------------------------------------------------------------------------------------------------------------------------------------------------------------------------------------------------------------------------------------------------------------------------------------------------------------------------------------------------------------------------------------------------------------------------------------------------------------------------------------------------------------------------------------------------------------------------------------------------------------------------------------------------------------------------------------------------------------------------------------------------------------------------------------------------------------------------------------------------------------------------------------------------------------------------------------------------------------------------------------------------------------------------------------------------------------------------------------------------------------------------------------------------------|

|                       |                                                                                                                                                                                                                                                                                                                                                                                                                                                                                                                                                                                                                                                                                                                                                                                                                                                                                                                                                                                                                                                                                                                                                                                                                                                                                                                                                                                                                                                                                                                                                                                                                                                                                                                                                                                                                                                                                                                                                                                                                                                                                                                                                                                                                                                                                                                                                                                                                                                                                                                                                                                                                                                                                                                                                                                                                                                                                                                                                                                                                                                                                                                                                                                                                                                                                                                                                                                                                                                                                                                                                                                                                                                                |
|-----------------------|----------------------------------------------------------------------------------------------------------------------------------------------------------------------------------------------------------------------------------------------------------------------------------------------------------------------------------------------------------------------------------------------------------------------------------------------------------------------------------------------------------------------------------------------------------------------------------------------------------------------------------------------------------------------------------------------------------------------------------------------------------------------------------------------------------------------------------------------------------------------------------------------------------------------------------------------------------------------------------------------------------------------------------------------------------------------------------------------------------------------------------------------------------------------------------------------------------------------------------------------------------------------------------------------------------------------------------------------------------------------------------------------------------------------------------------------------------------------------------------------------------------------------------------------------------------------------------------------------------------------------------------------------------------------------------------------------------------------------------------------------------------------------------------------------------------------------------------------------------------------------------------------------------------------------------------------------------------------------------------------------------------------------------------------------------------------------------------------------------------------------------------------------------------------------------------------------------------------------------------------------------------------------------------------------------------------------------------------------------------------------------------------------------------------------------------------------------------------------------------------------------------------------------------------------------------------------------------------------------------------------------------------------------------------------------------------------------------------------------------------------------------------------------------------------------------------------------------------------------------------------------------------------------------------------------------------------------------------------------------------------------------------------------------------------------------------------------------------------------------------------------------------------------------------------------------------------------------------------------------------------------------------------------------------------------------------------------------------------------------------------------------------------------------------------------------------------------------------------------------------------------------------------------------------------------------------------------------------------------------------------------------------------------------|
|                       | <p>physical OR manipulative) ADJ medicine)).ab,ti.)) NOT ((letter* OR news OR comment* OR editorial* OR congres* OR abstract* OR dissertation abstract*).pt.)) NOT (((exp "Delivery of Health Care, Integrated"/ OR "Continuity of Patient Care"/ OR "Transitional Care"/ OR "Patient Handoff"/ OR "Patient Care Team"/ OR exp "Patient Care Planning"/ OR "Health Services"/ OR "Delivery of Health Care"/ OR exp "Intersectoral Collaboration"/ OR exp "Interprofessional Relations"/ OR ((Integrat* ADJ (care OR healthcare OR delivery OR pathway* OR "hospital care")) OR "transition* care" OR "clinical pathway*" OR "patient care plan*" OR ((multi?disciplinary OR inter?professional OR inter?disciplinary OR multi?speciality OR multi?agency OR inter?agency OR multi?professional OR inter?sectoral) ADJ (team? OR care OR healthcare OR collaboration OR intervention* OR management OR approach* OR program* OR treatment*)) OR hand?off* OR ((coordinat* OR collaborat*) ADJ (care OR service* OR program* OR approach*))).ab,ti.) AND (Hospitalization/ OR Length of Stay/ OR Inpatients/ OR (hospital* OR inpatient*).ab,ti.) AND (exp "Aged"/ OR exp "Geriatrics"/ OR exp "Geriatric Nursing"/ OR exp "Geriatric Assessment"/ OR exp "Geriatric Psychiatry"/ OR (elder* OR eldest OR geriatr* OR "old aged" OR "oldest old*" OR "very old*" OR (older ADJ (patient* OR people OR subject* OR age* OR adult* OR man OR men OR male* OR woman OR women OR female* OR population* OR person* OR individual*)) OR aging OR ageing OR senior* OR "late life").ab,ti.) AND (exp "Complementary Therapies"/ OR exp "Integrative Medicine"/ OR exp "Physical Therapy Modalities"/ OR exp "Psychotherapy"/ OR exp "plants, medicinal"/ OR "Therapeutics"/ OR exp "Apitherapy"/ OR exp "Leeching"/ OR exp "Nutrition Therapy"/ OR exp "Rehabilitation"/ OR (((alternative OR complementary OR traditional OR animal OR pet OR bee OR honey OR propolis OR leech OR physical OR manual OR manipulative OR dance OR music OR movement OR art OR energy OR spiritual OR clown OR humor OR humour OR laughter OR bio-resonance OR bioresonance OR garden* OR horticultural OR nature OR reflex OR diet OR nutrition OR "non-pharmacological" OR kinesis OR occupational OR meditative OR recreation) ADJ therap*) OR "exercise training" OR "spiritual healing" OR acupuncture OR acupressure OR bodywork OR Shiatsu OR apitherap* OR homeotherap* OR homeopath* OR hirudotherap* OR leeching OR physiotherap* OR massage OR osteopath* OR chiropra* OR chirotherap* OR masso?therap* OR reflexolog* OR kinesiotherap* OR pilates OR naturopath* OR dietary OR dietician* OR yoga OR "tai ji" OR Taiji?quan OR "Tai Chi" OR "chi kung" OR chigung OR qi#gong OR psychotherap* OR hypnos* OR hypnotherap* OR meditation OR relaxation OR mindfulness OR "breathing exercise*" OR "guided imagery" OR reflexotherap* OR breathwork OR cupping OR Reiki OR iridology OR gelotherap* OR psychodermatology OR aromatherap* OR "essential oil*" OR phythotherap* OR clowntherap* OR ethnomedicin*OR hydrotherap* OR rehabilitation OR ((alternative OR complementary OR traditional OR African OR Chinese OR herbal OR Indian OR kampo OR Korean OR American OR Mongolian OR oriental OR Tibetan OR Arabic OR Islamic OR persian OR unani OR native OR indigenous OR naturopathic OR energy OR spiritual OR vibrational OR osteopathic OR psycho-cutaneous OR psychocutaneous OR Integrative OR physical OR manipulative) ADJ medicine)).ab,ti.)) NOT ((letter* OR news OR comment* OR editorial* OR congres* OR abstract* OR dissertation abstract*).pt.))</p> |
| <b>Commentaires</b>   | Ovid MEDLINE(R) ALL 1946 to September 19, 2023<br><b>Ajouter le filtre de date manuellement</b>                                                                                                                                                                                                                                                                                                                                                                                                                                                                                                                                                                                                                                                                                                                                                                                                                                                                                                                                                                                                                                                                                                                                                                                                                                                                                                                                                                                                                                                                                                                                                                                                                                                                                                                                                                                                                                                                                                                                                                                                                                                                                                                                                                                                                                                                                                                                                                                                                                                                                                                                                                                                                                                                                                                                                                                                                                                                                                                                                                                                                                                                                                                                                                                                                                                                                                                                                                                                                                                                                                                                                                |
| <b>Réf. trouvées.</b> | 150 références trouvées le 20.09.2023                                                                                                                                                                                                                                                                                                                                                                                                                                                                                                                                                                                                                                                                                                                                                                                                                                                                                                                                                                                                                                                                                                                                                                                                                                                                                                                                                                                                                                                                                                                                                                                                                                                                                                                                                                                                                                                                                                                                                                                                                                                                                                                                                                                                                                                                                                                                                                                                                                                                                                                                                                                                                                                                                                                                                                                                                                                                                                                                                                                                                                                                                                                                                                                                                                                                                                                                                                                                                                                                                                                                                                                                                          |

#### 4.2.3 CINAHL EBSKO

|                  |                                                                                                                                                                                                                                                                                                                                                                                                                                                                                                                                                                                                                                                                                                                                                                                                                                                                                                                                                                                                                                                                                                                                                                                                                                                                                                                                                                                                                                                                                                                                                                                                                                                                                                                                                                                                                                                                   |
|------------------|-------------------------------------------------------------------------------------------------------------------------------------------------------------------------------------------------------------------------------------------------------------------------------------------------------------------------------------------------------------------------------------------------------------------------------------------------------------------------------------------------------------------------------------------------------------------------------------------------------------------------------------------------------------------------------------------------------------------------------------------------------------------------------------------------------------------------------------------------------------------------------------------------------------------------------------------------------------------------------------------------------------------------------------------------------------------------------------------------------------------------------------------------------------------------------------------------------------------------------------------------------------------------------------------------------------------------------------------------------------------------------------------------------------------------------------------------------------------------------------------------------------------------------------------------------------------------------------------------------------------------------------------------------------------------------------------------------------------------------------------------------------------------------------------------------------------------------------------------------------------|
| <b>Stratégie</b> | <p>((((( MH "Health Care Delivery, Integrated" OR MH "Transitional Care" OR MH "Hand Off (Patient Safety)" OR MH "Multidisciplinary Care Team" OR MH "Health Services" OR MH "Patient Assessment+" OR MH "Health Care Delivery" OR MH "Continuity of Patient Care" OR MH "Patient Care Plans" OR MH "Critical Path" OR MH "Interprofessional Relations" ) OR TI ( (Integrat* W1 (care OR healthcare OR delivery OR pathway* OR "hospital care")) OR "transition* care" OR "clinical pathway*" OR "patient care plan*" OR ((multi#disciplinary OR inter#professional OR inter#disciplinary OR multi#speciality OR multi#agency OR inter#agency OR multi#professional OR inter#sectoral) W1 (team* OR care OR healthcare OR collaboration OR intervention* OR management OR approach* OR program* OR treatment*)) OR hand#off* OR ((coordinat* OR collaborat*) W1 (care OR service* OR program* OR approach*)) ) OR AB ( (Integrat* W1 (care OR healthcare OR delivery OR pathway* OR "hospital care")) OR "transition* care" OR "clinical pathway*" OR "patient care plan*" OR ((multi#disciplinary OR inter#professional OR inter#disciplinary OR multi#speciality OR multi#agency OR inter#agency OR multi#professional OR inter#sectoral) W1 (team* OR care OR healthcare OR collaboration OR intervention* OR management OR approach* OR program* OR treatment*)) OR hand#off* OR ((coordinat* OR collaborat*) W1 (care OR service* OR program* OR approach*)) )) AND (( MH "Transfer, Intrahospital" OR MH "Patient Admission" OR MH "Patient Discharge" OR MH "Readmission" ) OR TI ( "discharge planning" OR (patient W1 (admission OR discharge)) OR readmission* OR rehospitalization ) OR AB ( "discharge planning" OR (patient W1 (admission OR discharge)) OR readmission* OR rehospitalization )) AND (( MH "Aged+" OR MH "Gerontologic Nursing+"</p> |
|------------------|-------------------------------------------------------------------------------------------------------------------------------------------------------------------------------------------------------------------------------------------------------------------------------------------------------------------------------------------------------------------------------------------------------------------------------------------------------------------------------------------------------------------------------------------------------------------------------------------------------------------------------------------------------------------------------------------------------------------------------------------------------------------------------------------------------------------------------------------------------------------------------------------------------------------------------------------------------------------------------------------------------------------------------------------------------------------------------------------------------------------------------------------------------------------------------------------------------------------------------------------------------------------------------------------------------------------------------------------------------------------------------------------------------------------------------------------------------------------------------------------------------------------------------------------------------------------------------------------------------------------------------------------------------------------------------------------------------------------------------------------------------------------------------------------------------------------------------------------------------------------|

OR MH "Geriatric Assessment+" OR MH "Geriatrics" OR MH "Geriatric Psychiatry" OR MH "Gerontologic Care" ) OR TI ( elder\* OR eldest OR geriatr\* OR "old aged" OR "oldest old\*" OR "very old\*" OR (older W1 (patient\* OR people OR subject\* OR age\* OR adult\* OR man OR men OR male\* OR woman OR women OR female\* OR population\* OR person\* OR individual\*)) OR aging OR ageing OR senior\* OR "late life" ) OR AB ( elder\* OR eldest OR geriatr\* OR "old aged" OR "oldest old\*" OR "very old\*" OR (older W1 (patient\* OR people OR subject\* OR age\* OR adult\* OR man OR men OR male\* OR woman OR women OR female\* OR population\* OR person\* OR individual\*)) OR aging OR ageing OR senior\* OR "late life" )) AND (( MH "Alternative Therapies+" OR MH "Psychotherapy+" OR MH "Plants, Medicinal+" OR MH "Therapeutics" OR MH "Diet Therapy+" OR MH "Physical Medicine" OR MH "Rehabilitation+" ) OR TI ( ((alternative OR complementary OR traditional OR animal OR pet OR bee OR honey OR propolis OR leech OR physical OR manual OR manipulative OR dance OR music OR movement OR art OR energy OR spiritual OR clown OR humor OR humour OR laughter OR bio-resonance OR bioresonance OR garden\* OR horticultural OR nature OR reflex OR diet OR nutrition OR "non-pharmacological" OR kinesis OR occupational OR meditative OR recreation OR exercise\*) W1 therap\*) OR acupuncture OR acupressure OR bodywork OR Shiatsu OR apitherapy OR homeotherap\* OR homeopath\* OR hirudotherap\* OR leeching OR physiotherap\* OR massage OR osteopath\* OR chiropra\* OR chirotherap\* OR masso?therap\* OR reflexolog\* OR kinesiotherap\* OR pilates OR naturopath\* OR dietary OR dietician\* OR yoga OR "tai ji" OR Taiji#quan OR "Tai Chi" OR "chi kung" OR chigung OR qi#gong OR psychotherap\* OR hypnos\* OR hypnotherap\* OR meditation OR relaxation OR mindfulness OR "breathing exercise\*" OR "guided imagery OR reflexotherap\* OR breathwork OR cupping OR Reiki OR iridology OR gelototherap\* OR psychodermatology OR aromatherap\* OR "essential oil\*" OR phytotherap\* OR clowntherap\* OR ethnomedicin\* OR hydrotherap\* OR rehabilitation OR ((alternative OR complementary OR traditional OR African OR Chinese OR herbal OR Indian OR kampo OR Korean OR American OR Mongolian OR oriental OR Tibetan OR Arabic OR Islamic OR persian OR unani OR native OR indigenous OR naturopathic OR energy OR spiritual OR vibrational OR osteopathic OR psycho-cutaneous OR psychocutaneous OR Integrative OR physical OR manipulative) W1 medicine\*) ) OR AB ( ((alternative OR complementary OR traditional OR animal OR pet OR bee OR honey OR propolis OR leech OR physical OR manual OR manipulative OR dance OR music OR movement OR art OR energy OR spiritual OR clown OR humor OR humour OR laughter OR bio-resonance OR bioresonance OR garden\* OR horticultural OR nature OR reflex OR diet OR nutrition OR "non-pharmacological" OR kinesis OR occupational OR meditative OR recreation OR exercise\*) W1 therap\*) OR acupuncture OR acupressure OR bodywork OR Shiatsu OR apitherapy OR homeotherap\* OR homeopath\* OR hirudotherap\* OR leeching OR physiotherap\* OR massage OR osteopath\* OR chiropra\* OR chirotherap\* OR masso?therap\* OR reflexolog\* OR kinesiotherap\* OR pilates OR naturopath\* OR dietary OR dietician\* OR yoga OR "Tai Ji" OR Taiji#quan OR "Tai Chi" OR "chi kung" OR chigung OR qi#gong OR psychotherap\* OR hypnos\* OR hypnotherap\* OR meditation OR relaxation OR mindfulness OR "breathing exercise\*" OR "guided imagery OR reflexotherap\* OR breathwork OR cupping OR Reiki OR iridology OR gelototherap\* OR psychodermatology OR aromatherap\* OR "essential oil\*" OR phytotherap\* OR clowntherap\* OR ethnomedicin\* OR hydrotherap\* OR rehabilitation OR ((alternative OR complementary OR traditional OR African OR Chinese OR herbal OR Indian OR kampo OR Korean OR American OR Mongolian OR oriental OR Tibetan OR Arabic OR Islamic OR persian OR unani OR native OR indigenous OR naturopathic OR energy OR spiritual OR vibrational OR osteopathic OR psycho-cutaneous OR psychocutaneous OR Integrative OR physical OR manipulative) W1 medicine\*) ))) NOT ( PT letter\* OR news OR comment\* OR editorial\* OR congres\* OR abstract\* OR dissertation abstract\* OR conference\* ) AND ( PY 1990-2023 ) ) NOT ((( MH "Health Care Delivery, Integrated" OR MH "Transitional Care" OR MH "Hand Off (Patient Safety)" OR MH "Multidisciplinary Care Team" OR MH "Health Services" OR MH "Patient Assessment+" OR MH "Health Care Delivery" OR MH "Continuity of Patient Care" OR MH "Patient Care Plans" OR MH "Critical Path" OR MH "Interprofessional Relations" ) OR TI ( (Integrat\* W1 (care OR healthcare OR delivery OR pathway\* OR "hospital care")) OR "transition\* care" OR "clinical pathway\*" OR "patient care plan\*" OR ((multi#disciplinary OR inter#professional OR inter#disciplinary OR multi#speciality OR multi#agency OR inter#agency OR multi#professional OR inter#sectoral) W1 (team\* OR care OR healthcare OR collaboration OR intervention\* OR management OR approach\* OR program\* OR treatment\*)) OR hand#off\* OR ((coordinat\* OR collaborat\*) W1 (care OR service\* OR program\* OR approach\*)) ) OR AB ( (Integrat\* W1 (care OR healthcare OR delivery OR pathway\* OR "hospital care")) OR "transition\* care" OR "clinical pathway\*" OR "patient care plan\*" OR ((multi#disciplinary OR inter#professional OR inter#disciplinary OR multi#speciality OR multi#agency OR inter#agency OR multi#professional OR inter#sectoral) W1 (team\* OR care OR healthcare OR collaboration OR intervention\* OR management OR approach\* OR program\* OR treatment\*)) OR hand#off\* OR ((coordinat\* OR collaborat\*) W1 (care OR service\* OR program\* OR approach\*)) ) ) AND (( MH "Hospitalization" OR MH "Length of Stay" OR MH "Hospitalization of Older Persons" OR MH "Inpatients" ) OR TI ( hospital\* OR inpatient\* ) OR AB ( hospital\* OR inpatient\* ) ) AND (( MH "Aged+" OR MH "Gerontologic Nursing+" OR MH "Geriatric Assessment+" OR MH "Geriatrics" OR MH "Geriatric Psychiatry" OR MH "Gerontologic Care" ) OR TI ( elder\* OR eldest OR geriatr\* OR "old aged" OR "oldest old\*" OR "very old\*" OR (older W1 (patient\* OR

|                      |                                                                                                                                                                                                                                                                                                                                                                                                                                                                                                                                                                                                                                                                                                                                                                                                                                                                                                                                                                                                                                                                                                                                                                                                                                                                                                                                                                                                                                                                                                                                                                                                                                                                                                                                                                                                                                                                                                                                                                                                                                                                                                                                                                                                                                                                                                                                                                                                                                                                                                                                                                                                                                                                                                                                                                                                                                                                                                                                                                                                                                                                                                                                                                                                                                                                                                                                                                                                                                                                                                                                                                                                                                                                                                                                                                                                                                                                                                                                                                                                                                                                                                                       |
|----------------------|-----------------------------------------------------------------------------------------------------------------------------------------------------------------------------------------------------------------------------------------------------------------------------------------------------------------------------------------------------------------------------------------------------------------------------------------------------------------------------------------------------------------------------------------------------------------------------------------------------------------------------------------------------------------------------------------------------------------------------------------------------------------------------------------------------------------------------------------------------------------------------------------------------------------------------------------------------------------------------------------------------------------------------------------------------------------------------------------------------------------------------------------------------------------------------------------------------------------------------------------------------------------------------------------------------------------------------------------------------------------------------------------------------------------------------------------------------------------------------------------------------------------------------------------------------------------------------------------------------------------------------------------------------------------------------------------------------------------------------------------------------------------------------------------------------------------------------------------------------------------------------------------------------------------------------------------------------------------------------------------------------------------------------------------------------------------------------------------------------------------------------------------------------------------------------------------------------------------------------------------------------------------------------------------------------------------------------------------------------------------------------------------------------------------------------------------------------------------------------------------------------------------------------------------------------------------------------------------------------------------------------------------------------------------------------------------------------------------------------------------------------------------------------------------------------------------------------------------------------------------------------------------------------------------------------------------------------------------------------------------------------------------------------------------------------------------------------------------------------------------------------------------------------------------------------------------------------------------------------------------------------------------------------------------------------------------------------------------------------------------------------------------------------------------------------------------------------------------------------------------------------------------------------------------------------------------------------------------------------------------------------------------------------------------------------------------------------------------------------------------------------------------------------------------------------------------------------------------------------------------------------------------------------------------------------------------------------------------------------------------------------------------------------------------------------------------------------------------------------------------------|
|                      | <p>people OR subject* OR age* OR adult* OR man OR men OR male* OR woman OR women OR female* OR population* OR person* OR individual*) OR aging OR ageing OR senior* OR "late life" ) OR AB ( elder* OR eldest OR geriatr* OR "old aged" OR "oldest old*" OR "very old*" OR (older W1 (patient* OR people OR subject* OR age* OR adult* OR man OR men OR male* OR woman OR women OR female* OR population* OR person* OR individual*)) OR aging OR ageing OR senior* OR "late life" ) ) AND ( ( MH "Alternative Therapies+" OR MH "Psychotherapy+" OR MH "Plants, Medicinal+" OR MH "Therapeutics" OR MH "Diet Therapy+" OR MH "Physical Medicine" OR MH "Rehabilitation+" ) OR TI ( ((alternative OR complementary OR traditional OR animal OR pet OR bee OR honey OR propolis OR leech OR physical OR manual OR manipulative OR dance OR music OR movement OR art OR energy OR spiritual OR clown OR humor OR humour OR laughter OR bio-resonance OR bioresonance OR garden* OR horticultural OR nature OR reflex OR diet OR nutrition OR "non-pharmacological" OR kinesis OR occupational OR meditative OR recreation OR exercise*) W1 therap*) OR acupuncture OR acupressure OR bodywork OR Shiatsu OR apitherapy OR homeotherap* OR homeopath* OR hirudotherap* OR leeching OR physiotherap* OR massage OR osteopath* OR chiropra* OR chirotherap* OR masso?therap* OR reflexolog* OR kinesiotherap* OR pilates OR naturopath* OR dietary OR dietician* OR yoga OR "tai ji" OR Taiji#quan OR "Tai Chi" OR "chi kung" OR chigung OR qi#gong OR psychotherap* OR hypnos* OR hypnotherap* OR meditation OR relaxation OR mindfulness OR "breathing exercise*" OR "guided imagery OR reflexotherap* OR breathwork OR cupping OR Reiki OR iridology OR gelototherap* OR psychodermatology OR aromatherap* OR "essential oil*" OR phythotherap* OR clowntherap* OR ethnomedicin* OR hydrotherap* OR rehabilitation OR ((alternative OR complementary OR traditional OR African OR Chinese OR herbal OR Indian OR kampo OR Korean OR American OR Mongolian OR oriental OR Tibetan OR Arabic OR Islamic OR persian OR unani OR native OR indigenous OR naturopathic OR energy OR spiritual OR vibrational OR osteopathic OR psycho-cutaneous OR psychocutaneous OR Integrative OR physical OR manipulative) W1 medicine*) ) OR AB ( ((alternative OR complementary OR traditional OR animal OR pet OR bee OR honey OR propolis OR leech OR physical OR manual OR manipulative OR dance OR music OR movement OR art OR energy OR spiritual OR clown OR humor OR humour OR laughter OR bio-resonance OR bioresonance OR garden* OR horticultural OR nature OR reflex OR diet OR nutrition OR "non-pharmacological" OR kinesis OR occupational OR meditative OR recreation OR exercise*) W1 therap*) OR acupuncture OR acupressure OR bodywork OR Shiatsu OR apitherapy OR homeotherap* OR homeopath* OR hirudotherap* OR leeching OR physiotherap* OR massage OR osteopath* OR chiropra* OR chirotherap* OR masso?therap* OR reflexolog* OR kinesiotherap* OR pilates OR naturopath* OR dietary OR dietician* OR yoga OR "Tai Ji" OR Taiji#quan OR "Tai Chi" OR "chi kung" OR chigung OR qi#gong OR psychotherap* OR hypnos* OR hypnotherap* OR meditation OR relaxation OR mindfulness OR "breathing exercise*" OR "guided imagery OR reflexotherap* OR breathwork OR cupping OR Reiki OR iridology OR gelototherap* OR psychodermatology OR aromatherap* OR "essential oil*" OR phythotherap* OR clowntherap* OR ethnomedicin* OR hydrotherap* OR rehabilitation OR ((alternative OR complementary OR traditional OR African OR Chinese OR herbal OR Indian OR kampo OR Korean OR American OR Mongolian OR oriental OR Tibetan OR Arabic OR Islamic OR persian OR unani OR native OR indigenous OR naturopathic OR energy OR spiritual OR vibrational OR osteopathic OR psycho-cutaneous OR psychocutaneous OR Integrative OR physical OR manipulative) W1 medicine*) ))) NOT ( PT letter* OR news OR comment* OR editorial* OR congres* OR abstract* OR dissertation abstract* OR conference* ) AND ( PY 1990-2023 )</p> |
| <b>Commentaires</b>  |                                                                                                                                                                                                                                                                                                                                                                                                                                                                                                                                                                                                                                                                                                                                                                                                                                                                                                                                                                                                                                                                                                                                                                                                                                                                                                                                                                                                                                                                                                                                                                                                                                                                                                                                                                                                                                                                                                                                                                                                                                                                                                                                                                                                                                                                                                                                                                                                                                                                                                                                                                                                                                                                                                                                                                                                                                                                                                                                                                                                                                                                                                                                                                                                                                                                                                                                                                                                                                                                                                                                                                                                                                                                                                                                                                                                                                                                                                                                                                                                                                                                                                                       |
| <b>Réf. trouvée.</b> | 137 références trouvées le 20.09.2023                                                                                                                                                                                                                                                                                                                                                                                                                                                                                                                                                                                                                                                                                                                                                                                                                                                                                                                                                                                                                                                                                                                                                                                                                                                                                                                                                                                                                                                                                                                                                                                                                                                                                                                                                                                                                                                                                                                                                                                                                                                                                                                                                                                                                                                                                                                                                                                                                                                                                                                                                                                                                                                                                                                                                                                                                                                                                                                                                                                                                                                                                                                                                                                                                                                                                                                                                                                                                                                                                                                                                                                                                                                                                                                                                                                                                                                                                                                                                                                                                                                                                 |

#### 4.2.4 PsychInfo Ovid SP

|                  |                                                                                                                                                                                                                                                                                                                                                                                                                                                                                                                                                                                                                                                                                                                                                                                                                                                                                                                                                                                                                                                                                                                                                                                                                                                                 |
|------------------|-----------------------------------------------------------------------------------------------------------------------------------------------------------------------------------------------------------------------------------------------------------------------------------------------------------------------------------------------------------------------------------------------------------------------------------------------------------------------------------------------------------------------------------------------------------------------------------------------------------------------------------------------------------------------------------------------------------------------------------------------------------------------------------------------------------------------------------------------------------------------------------------------------------------------------------------------------------------------------------------------------------------------------------------------------------------------------------------------------------------------------------------------------------------------------------------------------------------------------------------------------------------|
| <b>Stratégie</b> | <p>(((((integrated services/ OR Continuity of Patient Care/ OR Transitional Care/ OR Patient Handoff/ OR Patient Care Team/ OR exp Patient Care Planning/ OR Health Services/ OR Delivery of Health Care/ OR exp Intersectoral Collaboration/ OR exp Interprofessional Relations/ OR ((Integrat* ADJ (care OR healthcare OR delivery OR pathway* OR "hospital care")) OR "transition* care" OR "clinical pathway*" OR "patient care plan*" OR ((multi?disciplinary OR inter?professional OR inter?disciplinary OR multi?speciality OR multi?agency OR inter?agency OR multi?professional OR inter?sectoral) ADJ (team? OR care OR healthcare OR collaboration OR intervention* OR management OR approach* OR program* OR treatment*)) OR hand?off* OR ((coordinat* OR collaborat*) ADJ (care OR service* OR program* OR approach*))).ab,ti.) AND (Patient Admission/ OR Patient Discharge/ OR Patient Readmission/ OR Patient Transfer/ OR ("discharge planning" OR "patient admission" OR "patient discharge" OR readmission* OR rehospitalization).ab,ti.) AND (exp Aged/ OR exp Geriatrics/ OR exp Geriatric Nursing/ OR exp Geriatric Assessment/ OR exp Geriatric Psychiatry/ OR (elder* OR eldest OR geriatr* OR "old aged" OR "oldest old*" OR "very</p> |
|------------------|-----------------------------------------------------------------------------------------------------------------------------------------------------------------------------------------------------------------------------------------------------------------------------------------------------------------------------------------------------------------------------------------------------------------------------------------------------------------------------------------------------------------------------------------------------------------------------------------------------------------------------------------------------------------------------------------------------------------------------------------------------------------------------------------------------------------------------------------------------------------------------------------------------------------------------------------------------------------------------------------------------------------------------------------------------------------------------------------------------------------------------------------------------------------------------------------------------------------------------------------------------------------|

old\*\* OR (older ADJ (patient\* OR people OR subject\* OR age\* OR adult\* OR man OR men OR male\* OR woman OR women OR female\* OR population\* OR person\* OR individual\*)) OR aging OR ageing OR senior\* OR "late life").ab,ti.) AND (exp Complementary Therapies/ OR exp Integrative Medicine/ OR exp Physical Therapy Modalities/ OR exp Psychotherapy/ OR exp plants, medicinal/ OR Therapeutics/ OR exp Apitherapy/ OR exp Leeching/ OR exp Nutrition Therapy/ OR exp Rehabilitation/ OR (((alternative OR complementary OR traditional OR animal OR pet OR bee OR honey OR propolis OR leech OR physical OR manual OR manipulative OR dance OR music OR movement OR art OR energy OR spiritual OR clown OR humor OR humour OR laughter OR bio-resonance OR bioresonance OR garden\* OR horticultural OR nature OR reflex OR diet OR nutrition OR "non-pharmacological" OR kinesis OR occupational OR meditative OR recreation) ADJ therap\*) OR "exercise training" OR "spiritual healing" OR acupuncture OR acupressure OR bodywork OR Shiatsu OR apitherap\* OR homeotherap\* OR homeopath\* OR hirudotherap\* OR leeching OR physiotherap\* OR massage OR osteopath\* OR chiropa\* OR chirotherap\* OR masso?therap\* OR reflexolog\* OR kinesiotherap\* OR pilates OR naturopath\* OR dietary OR dietician\* OR yoga OR "tai ji" OR Taiji?quan OR "Tai Chi" OR "chi kung" OR chigung OR qi#gong OR psychotherap\* OR hypnos\* OR hypnotherap\* OR meditation OR relaxation OR mindfulness OR "breathing exercise\*" OR "guided imagery" OR reflexotherap\* OR breathwork OR cupping OR Reiki OR iridology OR gelototherap\* OR psychodermatology OR aromatherap\* OR "essential oil\*" OR phytotherap\* OR clowntherap\* OR ethnomedicin\*OR hydrotherap\* OR rehabilitation OR ((alternative OR complementary OR traditional OR African OR Chinese OR herbal OR Indian OR kampo OR Korean OR American OR Mongolian OR oriental OR Tibetan OR Arabic OR Islamic OR persian OR unani OR native OR indigenous OR naturopathic OR energy OR spiritual OR vibrational OR osteopathic OR psycho-cutaneous OR psychocutaneous OR Integrative OR physical OR manipulative) ADJ medicine)).ab,ti.)) NOT ((letter\* OR news OR comment\* OR editorial\* OR congres\* OR abstract\* OR dissertation abstract\*).pt.)) NOT (((integrated services/ OR Continuity of Patient Care/ OR Transitional Care/ OR Patient Handoff/ OR Patient Care Team/ OR exp Patient Care Planning/ OR Health Services/ OR Delivery of Health Care/ OR exp Intersectoral Collaboration/ OR exp Interprofessional Relations/ OR (Integrat\* ADJ (care OR healthcare OR delivery OR pathway\* OR "hospital care")) OR "transition\* care" OR "clinical pathway\*" OR "patient care plan\*" OR ((multi?disciplinary OR inter?professional OR inter?disciplinary OR multi?speciality OR multi?agency OR inter?agency OR multi?professional OR inter?sectoral) ADJ (team? OR care OR healthcare OR collaboration OR intervention\* OR management OR approach\* OR program\* OR treatment\*)) OR hand?off\* OR ((coordinat\* OR collaborat\*) ADJ (care OR service\* OR program\* OR approach\*))).ab,ti.) AND (Hospitalization/ OR Length of Stay/ OR Inpatients/ OR (hospital\* OR inpatient\*).ab,ti.) AND (exp Aged/ OR exp Geriatrics/ OR exp Geriatric Nursing/ OR exp Geriatric Assessment/ OR exp Geriatric Psychiatry/ OR (elder\* OR eldest OR geriatr\* OR "old aged" OR "oldest old\*" OR "very old\*" OR (older ADJ (patient\* OR people OR subject\* OR age\* OR adult\* OR man OR men OR male\* OR woman OR women OR female\* OR population\* OR person\* OR individual\*)) OR aging OR ageing OR senior\* OR "late life").ab,ti.) AND (exp Complementary Therapies/ OR exp Integrative Medicine/ OR exp Physical Therapy Modalities/ OR exp Psychotherapy/ OR exp plants, medicinal/ OR Therapeutics/ OR exp Apitherapy/ OR exp Leeching/ OR exp Nutrition Therapy/ OR exp Rehabilitation/ OR (((alternative OR complementary OR traditional OR animal OR pet OR bee OR honey OR propolis OR leech OR physical OR manual OR manipulative OR dance OR music OR movement OR art OR energy OR spiritual OR clown OR humor OR humour OR laughter OR bio-resonance OR bioresonance OR garden\* OR horticultural OR nature OR reflex OR diet OR nutrition OR "non-pharmacological" OR kinesis OR occupational OR meditative OR recreation) ADJ therap\*) OR "exercise training" OR "spiritual healing" OR acupuncture OR acupressure OR bodywork OR Shiatsu OR apitherap\* OR homeotherap\* OR homeopath\* OR hirudotherap\* OR leeching OR physiotherap\* OR massage OR osteopath\* OR chiropa\* OR chirotherap\* OR masso?therap\* OR reflexolog\* OR kinesiotherap\* OR pilates OR naturopath\* OR dietary OR dietician\* OR yoga OR "tai ji" OR Taiji?quan OR "Tai Chi" OR "chi kung" OR chigung OR qi#gong OR psychotherap\* OR hypnos\* OR hypnotherap\* OR meditation OR relaxation OR mindfulness OR "breathing exercise\*" OR "guided imagery" OR reflexotherap\* OR breathwork OR cupping OR Reiki OR iridology OR gelototherap\* OR psychodermatology OR aromatherap\* OR "essential oil\*" OR phytotherap\* OR clowntherap\* OR ethnomedicin\*OR hydrotherap\* OR rehabilitation OR ((alternative OR complementary OR traditional OR African OR Chinese OR herbal OR Indian OR kampo OR Korean OR American OR Mongolian OR oriental OR

|                      |                                                                                                                                                                                                                                                                                                                                                                    |
|----------------------|--------------------------------------------------------------------------------------------------------------------------------------------------------------------------------------------------------------------------------------------------------------------------------------------------------------------------------------------------------------------|
|                      | Tibetan OR Arabic OR Islamic OR persian OR unani OR native OR indigenous OR naturopathic OR energy OR spiritual OR vibrational OR osteopathic OR psycho-cutaneous OR psychocutaneous OR Integrative OR physical OR manipulative) ADJ medicine)).ab.ti.)) NOT ((letter* OR news OR comment* OR editorial* OR congres* OR abstract* OR dissertation abstract*).pt.)) |
| <b>Commentaires</b>  | APA PsycInfo 1806 to September Week 2 2023<br><b>Ajout le filtre de date manuellement</b>                                                                                                                                                                                                                                                                          |
| <b>Réf. trouvée.</b> | 7 références trouvées le 20.09.2023                                                                                                                                                                                                                                                                                                                                |

#### 4.2.5 Web of Science -Core collection

|                  |                                                                                                                                                                                                                                                                                                                                                                                                                                                                                                                                                                                                                                                                                                                                                                                                                                                                                                                                                                                                                                                                                                                                                                                                                                                                                                                                                                                                                                                                                                                                                                                                                                                                                                                                                                                                                                                                                                                                                                                                                                                                                                                                                                                                                                                                                                                                                                                                                                                                                                                                                                                                                                                                                                                                                                                                                                                                                                                                                                                                                                                                                                                                                                                                                                                                                                                                                                                                                                                                                                                                                                                                                                                                                                                                                                                                                                                                                                                                                                                                                                                                                                                                                                                                                                                                                                           |
|------------------|-----------------------------------------------------------------------------------------------------------------------------------------------------------------------------------------------------------------------------------------------------------------------------------------------------------------------------------------------------------------------------------------------------------------------------------------------------------------------------------------------------------------------------------------------------------------------------------------------------------------------------------------------------------------------------------------------------------------------------------------------------------------------------------------------------------------------------------------------------------------------------------------------------------------------------------------------------------------------------------------------------------------------------------------------------------------------------------------------------------------------------------------------------------------------------------------------------------------------------------------------------------------------------------------------------------------------------------------------------------------------------------------------------------------------------------------------------------------------------------------------------------------------------------------------------------------------------------------------------------------------------------------------------------------------------------------------------------------------------------------------------------------------------------------------------------------------------------------------------------------------------------------------------------------------------------------------------------------------------------------------------------------------------------------------------------------------------------------------------------------------------------------------------------------------------------------------------------------------------------------------------------------------------------------------------------------------------------------------------------------------------------------------------------------------------------------------------------------------------------------------------------------------------------------------------------------------------------------------------------------------------------------------------------------------------------------------------------------------------------------------------------------------------------------------------------------------------------------------------------------------------------------------------------------------------------------------------------------------------------------------------------------------------------------------------------------------------------------------------------------------------------------------------------------------------------------------------------------------------------------------------------------------------------------------------------------------------------------------------------------------------------------------------------------------------------------------------------------------------------------------------------------------------------------------------------------------------------------------------------------------------------------------------------------------------------------------------------------------------------------------------------------------------------------------------------------------------------------------------------------------------------------------------------------------------------------------------------------------------------------------------------------------------------------------------------------------------------------------------------------------------------------------------------------------------------------------------------------------------------------------------------------------------------------------------------|
| <b>Stratégie</b> | (TS=(((Integrat* NEAR/1 (care OR healthcare OR delivery OR pathway* OR "hospital care")) OR "transition* care" OR "clinical pathway*" OR "patient care plan*" OR ((multi\$disciplinary OR inter\$professional OR inter\$disciplinary OR multi\$speciality OR multi\$agency OR inter\$agency OR multi\$professional OR inter\$sectoral) NEAR/1 (team* OR care OR healthcare OR collaboration OR intervention* OR management OR approach* OR program* OR treatment*)) OR hand\$off* OR ((coordinat* OR collaborat*) NEAR/1 (care OR service* OR program* OR approach*)) AND ("discharge planning" OR (patient NEAR/1 (admission OR discharge)) OR readmission* OR rehospitalization) AND ((older NEAR/1 (patient* OR people OR subject* OR age* OR adult* OR m?n OR male* OR wom?n OR female* OR population* OR person* OR individual*)) OR aging OR ageing OR senior* OR "late life") AND (((alternative OR complementary OR traditional OR animal OR pet OR bee OR honey OR propolis OR leech OR physical OR manual OR manipulative OR dance OR music OR movement OR art OR energy OR spiritual OR clown OR humor OR humour OR laughter OR bio-resonance OR bioresonance OR garden* OR horticultural OR nature OR reflex OR diet OR nutrition OR "non-pharmacological" OR kinesis OR occupational OR meditative OR recreation OR exercise*) NEAR/1 therap*) OR "exercise training" OR "spiritual healing" OR acupuncture OR acupressure OR bodywork OR Shiatsu OR apitherap* OR homeotherap* OR homeopath* OR hirudotherap* OR leeching OR physiotherap* OR massage OR osteopath* OR chiropra* OR chirotherap* OR masso?therap* OR reflexolog* OR kinesiotherap* OR pilates OR naturopath* OR dietary OR dietician* OR yoga OR "tai ji" OR Taiji\$quan OR "Tai Chi" OR "chi kung" OR chigung OR qi?gong OR psychotherap* OR hypnos* OR hypnotherap* OR meditation OR relaxation OR mindfulness OR "breathing exercise*" OR "guided imagery" OR reflexotherap* OR breathwork OR cupping OR Reiki OR iridology OR gelototherap* OR psychodermatology OR aromatherap* OR "essential oil*" OR phytotherap* OR clowntherap* OR ethnomedicin* OR hydrotherap* OR rehabilitation OR ((alternative OR complementary OR traditional OR African OR Chinese OR herbal OR Indian OR kampo OR Korean OR American OR Mongolian OR oriental OR Tibetan OR Arabic OR Islamic OR persian OR unani OR native OR indigenous OR naturopathic OR energy OR spiritual OR vibrational OR osteopathic OR psycho-cutaneous OR psychocutaneous OR Integrative OR physical OR manipulative) NEAR/2 medicine*)) AND PY=(1990-2023) AND DT=(Article OR Review OR Book) NOT (TS=(((Integrat* NEAR/1 (care OR healthcare OR delivery OR pathway* OR "hospital care")) OR "transition* care" OR "clinical pathway*" OR "patient care plan*" OR ((multi\$disciplinary OR inter\$professional OR inter\$disciplinary OR multi\$speciality OR multi\$agency OR inter\$agency OR multi\$professional OR inter\$sectoral) NEAR/1 (team* OR care OR healthcare OR collaboration OR intervention* OR management OR approach* OR program* OR treatment*)) OR hand\$off* OR ((coordinat* OR collaborat*) NEAR/1 (care OR service* OR program* OR approach*)) AND (hospital* OR inpatient*) AND ((older NEAR/1 (patient* OR people OR subject* OR age* OR adult* OR m?n OR male* OR wom?n OR female* OR population* OR person* OR individual*)) OR aging OR ageing OR senior* OR "late life") AND (((alternative OR complementary OR traditional OR animal OR pet OR bee OR honey OR propolis OR leech OR physical OR manual OR manipulative OR dance OR music OR movement OR art OR energy OR spiritual OR clown OR humor OR humour OR laughter OR bio-resonance OR bioresonance OR garden* OR horticultural OR nature OR reflex OR diet OR nutrition OR "non-pharmacological" OR kinesis OR occupational OR meditative OR recreation OR exercise*) NEAR/1 therap*) OR "exercise training" OR "spiritual healing" OR acupuncture OR acupressure OR bodywork OR Shiatsu OR apitherap* OR homeotherap* OR homeopath* OR hirudotherap* OR leeching OR physiotherap* OR massage OR osteopath* OR chiropra* OR chirotherap* OR masso?therap* OR reflexolog* OR kinesiotherap* OR pilates OR naturopath* OR dietary OR dietician* OR yoga OR "tai ji" OR |
|------------------|-----------------------------------------------------------------------------------------------------------------------------------------------------------------------------------------------------------------------------------------------------------------------------------------------------------------------------------------------------------------------------------------------------------------------------------------------------------------------------------------------------------------------------------------------------------------------------------------------------------------------------------------------------------------------------------------------------------------------------------------------------------------------------------------------------------------------------------------------------------------------------------------------------------------------------------------------------------------------------------------------------------------------------------------------------------------------------------------------------------------------------------------------------------------------------------------------------------------------------------------------------------------------------------------------------------------------------------------------------------------------------------------------------------------------------------------------------------------------------------------------------------------------------------------------------------------------------------------------------------------------------------------------------------------------------------------------------------------------------------------------------------------------------------------------------------------------------------------------------------------------------------------------------------------------------------------------------------------------------------------------------------------------------------------------------------------------------------------------------------------------------------------------------------------------------------------------------------------------------------------------------------------------------------------------------------------------------------------------------------------------------------------------------------------------------------------------------------------------------------------------------------------------------------------------------------------------------------------------------------------------------------------------------------------------------------------------------------------------------------------------------------------------------------------------------------------------------------------------------------------------------------------------------------------------------------------------------------------------------------------------------------------------------------------------------------------------------------------------------------------------------------------------------------------------------------------------------------------------------------------------------------------------------------------------------------------------------------------------------------------------------------------------------------------------------------------------------------------------------------------------------------------------------------------------------------------------------------------------------------------------------------------------------------------------------------------------------------------------------------------------------------------------------------------------------------------------------------------------------------------------------------------------------------------------------------------------------------------------------------------------------------------------------------------------------------------------------------------------------------------------------------------------------------------------------------------------------------------------------------------------------------------------------------------------------------|

|                      |                                                                                                                                                                                                                                                                                                                                                                                                                                                                                                                                                                                                                                                                                                                                                                                                                                                                                                |
|----------------------|------------------------------------------------------------------------------------------------------------------------------------------------------------------------------------------------------------------------------------------------------------------------------------------------------------------------------------------------------------------------------------------------------------------------------------------------------------------------------------------------------------------------------------------------------------------------------------------------------------------------------------------------------------------------------------------------------------------------------------------------------------------------------------------------------------------------------------------------------------------------------------------------|
|                      | Taiji\$quan OR "Tai Chi" OR "chi kung" OR chigung OR qi?gong OR psychotherap* OR hypnos* OR hypnotherap* OR meditation OR relaxation OR mindfulness OR "breathing exercise*" OR "guided imagery" OR reflexotherap* OR breathwork OR cupping OR Reiki OR iridology OR gelototherap* OR psychodermatology OR aromatherap* OR "essential oil*" OR phythotherap* OR clowntherap* OR ethnomedicin*OR hydrotherap* OR rehabilitation OR ((alternative OR complementary OR traditional OR African OR Chinese OR herbal OR Indian OR kampo OR Korean OR American OR Mongolian OR oriental OR Tibetan OR Arabic OR Islamic OR persian OR unani OR native OR indigenous OR naturopathic OR energy OR spiritual OR vibrational OR osteopathic OR psychocutaneous OR psychocutaneous OR Integrative OR physical OR manipulative) NEAR/2 medicine*)) AND PY=(1990-2023) AND DT=(Article OR Review OR Book)) |
| <b>Commentaires</b>  |                                                                                                                                                                                                                                                                                                                                                                                                                                                                                                                                                                                                                                                                                                                                                                                                                                                                                                |
| <b>Réf. trouvée.</b> | 47 références trouvées le 20.09.2023                                                                                                                                                                                                                                                                                                                                                                                                                                                                                                                                                                                                                                                                                                                                                                                                                                                           |

#### 4.2.6 Cochrane library Wiley

|                  |                                                                                                                                                                                                                                                                                                                                                                                                                                                                                                                                                                                                                                                                                                                                                                                                                                                                                                                                                                                                                                                                                                                                                                                                                                                                                                                                                                                                                                                                                                                                                                                                                                                                                                                                                                                                                                                                                                                                                                                                                                                                                                                                                                                                                                                                                                                                                                                                                                                                                                                                                                                                                                                                                                                                                                                                                                                                                                                                                                                                                                                                                                                                                                                                                                                                                                                                                                                                                                                                                                                                                                                                                                                                                                                                                                                                                                                                        |
|------------------|------------------------------------------------------------------------------------------------------------------------------------------------------------------------------------------------------------------------------------------------------------------------------------------------------------------------------------------------------------------------------------------------------------------------------------------------------------------------------------------------------------------------------------------------------------------------------------------------------------------------------------------------------------------------------------------------------------------------------------------------------------------------------------------------------------------------------------------------------------------------------------------------------------------------------------------------------------------------------------------------------------------------------------------------------------------------------------------------------------------------------------------------------------------------------------------------------------------------------------------------------------------------------------------------------------------------------------------------------------------------------------------------------------------------------------------------------------------------------------------------------------------------------------------------------------------------------------------------------------------------------------------------------------------------------------------------------------------------------------------------------------------------------------------------------------------------------------------------------------------------------------------------------------------------------------------------------------------------------------------------------------------------------------------------------------------------------------------------------------------------------------------------------------------------------------------------------------------------------------------------------------------------------------------------------------------------------------------------------------------------------------------------------------------------------------------------------------------------------------------------------------------------------------------------------------------------------------------------------------------------------------------------------------------------------------------------------------------------------------------------------------------------------------------------------------------------------------------------------------------------------------------------------------------------------------------------------------------------------------------------------------------------------------------------------------------------------------------------------------------------------------------------------------------------------------------------------------------------------------------------------------------------------------------------------------------------------------------------------------------------------------------------------------------------------------------------------------------------------------------------------------------------------------------------------------------------------------------------------------------------------------------------------------------------------------------------------------------------------------------------------------------------------------------------------------------------------------------------------------------------|
| <b>Stratégie</b> | (((Integrat* NEXT (care OR healthcare OR delivery OR pathway* OR "hospital care")) OR "transition care" OR "transitional care" OR (clinical NEXT pathway*) OR ("patient care" NEXT plan*) OR (("multi disciplinary" OR multidisciplinary OR "inter professional" OR interprofessional OR interdisciplinary OR "inter disciplinary" OR multispeciality OR "multi speciality" OR multiagency OR "multi agency" OR interagency OR "inter agency" OR multiprofessional OR "multi professional" OR intersectoral OR "inter sectoral") NEXT (team* OR care OR healthcare OR collaboration OR intervention* OR management OR approach* OR program* OR treatment*)) OR handoff* OR (hand NEXT off*) OR ((coordinat* OR collaborat*) NEXT (care OR service* OR program* OR approach*)):ab,ti,kw AND ("discharge planning" OR (patient NEXT (admission OR discharge)) OR readmission* OR rehospitalization):ab,ti,kw AND (elder* OR eldest OR geriatr* OR "old aged" OR (oldest NEXT old*) OR (very NEXT old*) OR (older NEXT (patient* OR people OR subject* OR age* OR adult* OR man OR men OR male* OR woman OR women OR female* OR population* OR person* OR individual*)) OR aging OR ageing OR senior* OR "late life"):ab,ti,kw AND (((alternative OR complementary OR traditional OR animal OR pet OR bee OR honey OR propolis OR leech OR physical OR manual OR manipulative OR dance OR music OR movement OR art OR energy OR spiritual OR clown OR humor OR humour OR laughter OR "bio resonance" OR bioresonance OR garden* OR horticultural OR nature OR reflex OR diet OR nutrition OR "non pharmacological" OR kinesis OR occupational OR meditative OR recreation OR exercise*) NEXT therap*) OR "exercise training" OR "spiritual healing" OR acupuncture OR acupressure OR bodywork OR Shiatsu OR apitherap* OR homeotherap* OR homeopath* OR hirudotherap* OR leeching OR physiotherap* OR massage OR osteopath* OR chiropra* OR chirotherap* OR massotherap* OR (masso NEXT therap*) OR reflexolog* OR kinesiotherap* OR pilates OR naturopath* OR dietary OR dietician* OR yoga OR "tai ji" OR "Taiji quan" OR Taijiquan OR "Tai Chi" OR "chi kung" OR chigung OR qigong OR "qi gong" OR psychotherap* OR hypnos* OR hypnotherap* OR meditation OR relaxation OR mindfulness OR (breathing NEXT exercise*) OR "guided imagery" OR reflexotherap* OR breathwork OR cupping OR Reiki OR iridology OR gelototherap* OR psychodermatology OR aromatherap* OR (essential NEXT oil*) OR phythotherap* OR clowntherap* OR ethnomedicin*OR hydrotherap* OR rehabilitation OR ((alternative OR complementary OR traditional OR African OR Chinese OR herbal OR Indian OR kampo OR Korean OR American OR Mongolian OR oriental OR Tibetan OR Arabic OR Islamic OR persian OR unani OR native OR indigenous OR naturopathic OR energy OR spiritual OR vibrational OR osteopathic OR "psycho cutaneous" OR psychocutaneous OR Integrative OR physical OR manipulative) NEXT medicine*)):ab,ti,kw) NOT (((Integrat* NEXT (care OR healthcare OR delivery OR pathway* OR "hospital care")) OR "transition care" OR "transitional care" OR (clinical NEXT pathway*) OR ("patient care" NEXT plan*) OR (("multi disciplinary" OR multidisciplinary OR "inter professional" OR interprofessional OR interdisciplinary OR "inter disciplinary" OR multispeciality OR "multi speciality" OR multiagency OR "multi agency" OR interagency OR "inter agency" OR multiprofessional OR "multi professional" OR intersectoral OR "inter sectoral") NEXT (team* OR care OR healthcare OR collaboration OR intervention* OR management OR approach* OR program* OR treatment*)) OR handoff* OR (hand NEXT off*) OR ((coordinat* OR collaborat*) NEXT (care OR service* OR program* OR approach*)):ab,ti,kw AND (hospital* OR inpatient*):ab,ti,kw AND (elder* OR eldest OR geriatr* OR |
|------------------|------------------------------------------------------------------------------------------------------------------------------------------------------------------------------------------------------------------------------------------------------------------------------------------------------------------------------------------------------------------------------------------------------------------------------------------------------------------------------------------------------------------------------------------------------------------------------------------------------------------------------------------------------------------------------------------------------------------------------------------------------------------------------------------------------------------------------------------------------------------------------------------------------------------------------------------------------------------------------------------------------------------------------------------------------------------------------------------------------------------------------------------------------------------------------------------------------------------------------------------------------------------------------------------------------------------------------------------------------------------------------------------------------------------------------------------------------------------------------------------------------------------------------------------------------------------------------------------------------------------------------------------------------------------------------------------------------------------------------------------------------------------------------------------------------------------------------------------------------------------------------------------------------------------------------------------------------------------------------------------------------------------------------------------------------------------------------------------------------------------------------------------------------------------------------------------------------------------------------------------------------------------------------------------------------------------------------------------------------------------------------------------------------------------------------------------------------------------------------------------------------------------------------------------------------------------------------------------------------------------------------------------------------------------------------------------------------------------------------------------------------------------------------------------------------------------------------------------------------------------------------------------------------------------------------------------------------------------------------------------------------------------------------------------------------------------------------------------------------------------------------------------------------------------------------------------------------------------------------------------------------------------------------------------------------------------------------------------------------------------------------------------------------------------------------------------------------------------------------------------------------------------------------------------------------------------------------------------------------------------------------------------------------------------------------------------------------------------------------------------------------------------------------------------------------------------------------------------------------------------------|

|                      |                                                                                                                                                                                                                                                                                                                                                                                                                                                                                                                                                                                                                                                                                                                                                                                                                                                                                                                                                                                                                                                                                                                                                                                                                                                                                                                                                                                                                                                                                                                                                                                                                                                                                                                                                                                                                                                                                                                                                                                                                                             |
|----------------------|---------------------------------------------------------------------------------------------------------------------------------------------------------------------------------------------------------------------------------------------------------------------------------------------------------------------------------------------------------------------------------------------------------------------------------------------------------------------------------------------------------------------------------------------------------------------------------------------------------------------------------------------------------------------------------------------------------------------------------------------------------------------------------------------------------------------------------------------------------------------------------------------------------------------------------------------------------------------------------------------------------------------------------------------------------------------------------------------------------------------------------------------------------------------------------------------------------------------------------------------------------------------------------------------------------------------------------------------------------------------------------------------------------------------------------------------------------------------------------------------------------------------------------------------------------------------------------------------------------------------------------------------------------------------------------------------------------------------------------------------------------------------------------------------------------------------------------------------------------------------------------------------------------------------------------------------------------------------------------------------------------------------------------------------|
|                      | "old aged" OR (oldest NEXT old*) OR (very NEXT old*) OR (older NEXT (patient* OR people OR subject* OR age* OR adult* OR man OR men OR male* OR woman OR women OR female* OR population* OR person* OR individual*)) OR aging OR ageing OR senior* OR "late life"):ab,ti,kw AND (((alternative OR complementary OR traditional OR animal OR pet OR bee OR honey OR propolis OR leech OR physical OR manual OR manipulative OR dance OR music OR movement OR art OR energy OR spiritual OR clown OR humor OR humour OR laughter OR "bio resonance" OR bioresonance OR garden* OR horticultural OR nature OR reflex OR diet OR nutrition OR "non pharmacological" OR kinesis OR occupational OR meditative OR recreation OR exercise*) NEXT therap*) OR "exercise training" OR "spiritual healing" OR acupuncture OR acupressure OR bodywork OR Shiatsu OR apitherap* OR homeotherap* OR homeopath* OR hirudotherap* OR leeching OR physiotherap* OR massage OR osteopath* OR chiropr* OR chirotherap* OR massotherap* OR (masso NEXT therap*) OR reflexolog* OR kinesiotherap* OR pilates OR naturopath* OR dietary OR dietician* OR yoga OR "tai ji" OR "Taiji quan" OR Taijiquan OR "Tai Chi" OR "chi kung" OR chigung OR qigong OR "qi gong" OR psychotherap* OR hypnos* OR hypnotherap* OR meditation OR relaxation OR mindfulness OR (breathing NEXT exercise*) OR "guided imagery" OR reflexotherap* OR breathwork OR cupping OR Reiki OR iridology OR gelotherap* OR psychodermatology OR aromatherap* OR (essential NEXT oil*) OR phytotherap* OR clowntherap* OR ethnomedicin*OR hydrotherap* OR rehabilitation OR ((alternative OR complementary OR traditional OR African OR Chinese OR herbal OR Indian OR kampo OR Korean OR American OR Mongolian OR oriental OR Tibetan OR Arabic OR Islamic OR persian OR unani OR native OR indigenous OR naturopathic OR energy OR spiritual OR vibrational OR osteopathic OR "psycho cutaneous" OR psychocutaneous OR Integrative OR physical OR manipulative) NEXT medicine*)):ab,ti,kw) |
| <b>Commentaires</b>  | Cochrane Database of Systematic Reviews - Issue 9 of 12, September 2023<br>Cochrane Central Register of Controlled Trials - Issue 8 of 12, August 2023<br><b>Ajouter le filtre de date manuellement</b>                                                                                                                                                                                                                                                                                                                                                                                                                                                                                                                                                                                                                                                                                                                                                                                                                                                                                                                                                                                                                                                                                                                                                                                                                                                                                                                                                                                                                                                                                                                                                                                                                                                                                                                                                                                                                                     |
| <b>Réf. trouvée.</b> | 1 référence trouvée le 20.09.2023<br>1 trial                                                                                                                                                                                                                                                                                                                                                                                                                                                                                                                                                                                                                                                                                                                                                                                                                                                                                                                                                                                                                                                                                                                                                                                                                                                                                                                                                                                                                                                                                                                                                                                                                                                                                                                                                                                                                                                                                                                                                                                                |

#### 4.2.7 Pubmed

|                  |                                                                                                                                                                                                                                                                                                                                                                                                                                                                                                                                                                                                                                                                                                                                                                                                                                                                                                                                                                                                                                                                                                                                                                                                                                                                                                                                                                                                                                                                                                                                                                                                                                                                                                                                                                                                                                                                                                                                                                                                                                                                                                                                                                                                                                                                                                                                                                          |
|------------------|--------------------------------------------------------------------------------------------------------------------------------------------------------------------------------------------------------------------------------------------------------------------------------------------------------------------------------------------------------------------------------------------------------------------------------------------------------------------------------------------------------------------------------------------------------------------------------------------------------------------------------------------------------------------------------------------------------------------------------------------------------------------------------------------------------------------------------------------------------------------------------------------------------------------------------------------------------------------------------------------------------------------------------------------------------------------------------------------------------------------------------------------------------------------------------------------------------------------------------------------------------------------------------------------------------------------------------------------------------------------------------------------------------------------------------------------------------------------------------------------------------------------------------------------------------------------------------------------------------------------------------------------------------------------------------------------------------------------------------------------------------------------------------------------------------------------------------------------------------------------------------------------------------------------------------------------------------------------------------------------------------------------------------------------------------------------------------------------------------------------------------------------------------------------------------------------------------------------------------------------------------------------------------------------------------------------------------------------------------------------------|
| <b>Stratégie</b> | ((("Integrative care" OR "integrating care" OR "Integrative healthcare" OR "Integrative pathway*" OR "Integrated care" OR "Integrated healthcare" OR "Integrated delivery" OR "Integrated pathway*" OR "Integrated hospital care" OR "transition care" OR "transitional care" OR "clinical pathway*" OR "patient care plan*" OR ("multi disciplinary" OR multidisciplinary OR "inter professional" OR interprofessional OR interdisciplinary OR "inter disciplinary" OR multispeciality OR "multi speciality" OR multiagency OR "multi agency" OR interagency OR "inter agency" OR multiprofessional OR "multi professional" OR intersectoral OR "inter sectoral") AND (team* OR care OR healthcare OR collaboration OR intervention* OR management OR approach* OR program* OR treatment*)) OR handoff* OR "hand off*" OR "collaborative healthcare" OR "collaborative care") AND ("discharge planning" OR "patient admission" OR "patient discharge" OR readmission* OR rehospitalization) AND (elder* OR eldest OR geriatr* OR "old aged" OR "oldest old*" OR "very old*" OR "older patient*" OR "older people" OR "older age*" OR "older adult*" OR "older man" OR "older men" OR "older woman" OR "older women" OR "older population*" OR "older person*" OR "older individual*" OR aging OR ageing OR senior* OR "late life") AND ("alternative therap*" OR "complementary therap*" OR "traditional therap*" OR "pet therap*" OR "physical therap*" OR "manual therap*" OR "manipulative therap*" OR "dance therap*" OR "music therap*" OR "movement therap*" OR "art therap*" OR "diet therap*" OR "nutrition therap*" OR "non pharmacological therap*" OR "kinesis therap*" OR "occupational therap*" OR "meditative therap*" OR "recreation therap*" OR "exercise therap*" OR "exercise training" OR acupuncture OR acupressure OR bodywork OR homeopath* OR physiotherap* OR massage OR osteopath* OR chiropr* OR kinesiotherap* OR naturopath* OR dietary OR dietician* OR yoga OR "tai ji" OR "Taiji quan" OR Taijiquan OR "Tai Chi" OR qigong OR "qi gong" OR psychotherap* OR meditation OR relaxation OR mindfulness OR "breathing exercise*" OR "guided imagery" OR Reiki OR psychodermatology OR aromatherap* OR "essential oil*" OR phytotherap* OR rehabilitation OR " alternative medicine" OR "complementary medicine" OR "traditional medicine" OR |
|------------------|--------------------------------------------------------------------------------------------------------------------------------------------------------------------------------------------------------------------------------------------------------------------------------------------------------------------------------------------------------------------------------------------------------------------------------------------------------------------------------------------------------------------------------------------------------------------------------------------------------------------------------------------------------------------------------------------------------------------------------------------------------------------------------------------------------------------------------------------------------------------------------------------------------------------------------------------------------------------------------------------------------------------------------------------------------------------------------------------------------------------------------------------------------------------------------------------------------------------------------------------------------------------------------------------------------------------------------------------------------------------------------------------------------------------------------------------------------------------------------------------------------------------------------------------------------------------------------------------------------------------------------------------------------------------------------------------------------------------------------------------------------------------------------------------------------------------------------------------------------------------------------------------------------------------------------------------------------------------------------------------------------------------------------------------------------------------------------------------------------------------------------------------------------------------------------------------------------------------------------------------------------------------------------------------------------------------------------------------------------------------------|

|                      |                                                                                                                                                                                                                                                                                                                                                                                                                                                                                                                                                                                                                                                                                                                                                                                                                                                                                                                                                                                                                                                                                                                                                                                                                                                                                                                                                                                                                                                                                                                                                                                                                                                                                                                                                                                                                                                                                                                                                                                                                                                                                                                                                                                                                                                                                                                                                                                                                                                                                                                                                                                                                                                                                                                                                                                                                                                                |
|----------------------|----------------------------------------------------------------------------------------------------------------------------------------------------------------------------------------------------------------------------------------------------------------------------------------------------------------------------------------------------------------------------------------------------------------------------------------------------------------------------------------------------------------------------------------------------------------------------------------------------------------------------------------------------------------------------------------------------------------------------------------------------------------------------------------------------------------------------------------------------------------------------------------------------------------------------------------------------------------------------------------------------------------------------------------------------------------------------------------------------------------------------------------------------------------------------------------------------------------------------------------------------------------------------------------------------------------------------------------------------------------------------------------------------------------------------------------------------------------------------------------------------------------------------------------------------------------------------------------------------------------------------------------------------------------------------------------------------------------------------------------------------------------------------------------------------------------------------------------------------------------------------------------------------------------------------------------------------------------------------------------------------------------------------------------------------------------------------------------------------------------------------------------------------------------------------------------------------------------------------------------------------------------------------------------------------------------------------------------------------------------------------------------------------------------------------------------------------------------------------------------------------------------------------------------------------------------------------------------------------------------------------------------------------------------------------------------------------------------------------------------------------------------------------------------------------------------------------------------------------------------|
|                      | "Chinese medicine" OR "herbal medicine" OR "Integrative medicine" OR "physical medicine" OR "manipulative medicine")) NOT medline[sb] NOT (letter* OR news OR comment* OR editorial* OR congres* OR abstract* OR dissertation abstract* OR conference*)) AND (1990:2023[pdat])) NOT (((("Integrative care" OR "integrating care" OR "Integrative healthcare" OR "Integrative pathway*" OR "Integrated care" OR "Integrated healthcare" OR "Integrated delivery" OR "Integrated pathway*" OR "Integrated hospital care" OR "transition care" OR "transitional care" OR "clinical pathway*" OR "patient care plan*" OR ("multi disciplinary" OR multidisciplinary OR "inter professional" OR interprofessional OR interdisciplinary OR "inter disciplinary" OR multispeciality OR "multi speciality" OR multiagency OR "multi agency" OR interagency OR "inter agency" OR multiprofessional OR "multi professional" OR intersectoral OR "inter sectoral") AND (team* OR care OR healthcare OR collaboration OR intervention* OR management OR approach* OR program* OR treatment*)) OR handoff* OR "hand off*" OR "collaborative healthcare" OR "collaborative care") AND (hospital* OR inpatient*) AND (elder* OR eldest OR geriatr* OR "old aged" OR "oldest old*" OR "very old*" OR "older patient*" OR "older people" OR "older age*" OR "older adult*" OR "older man" OR "older men" OR "older woman" OR "older women" OR "older population*" OR "older person*" OR "older individual*" OR aging OR ageing OR senior* OR "late life") AND ("alternative therap*" OR "complementary therap*" OR "traditional therap*" OR "pet therap*" OR "physical therap*" OR "manual therap*" OR "manipulative therap*" OR "dance therap*" OR "music therap*" OR "movement therap*" OR "art therap*" OR "diet therap*" OR "nutrition therap*" OR "non pharmacological therap*" OR "kinesis therap*" OR "occupational therap*" OR "meditative therap*" OR "recreation therap*" OR "exercise therap*" OR "exercise training" OR acupuncture OR acupressure OR bodywork OR homeopath* OR physiotherap* OR massage OR osteopath* OR chiropra* OR kinesiotherap* OR naturopath* OR dietary OR dietician* OR yoga OR "tai ji" OR "Taiji quan" OR Taijiquan OR "Tai Chi" OR qigong OR "qi gong" OR psychotherap* OR meditation OR relaxation OR mindfulness OR "breathing exercise*" OR "guided imagery" OR Reiki OR psychodermatology OR aromatherap* OR "essential oil*" OR phytotherap* OR rehabilitation OR " alternative medicine" OR "complementary medicine" OR "traditional medicine" OR "Chinese medicine" OR "herbal medicine" OR "Integrative medicine" OR "physical medicine" OR "manipulative medicine")) NOT medline[sb] NOT (letter* OR news OR comment* OR editorial* OR congres* OR abstract* OR dissertation abstract* OR conference*)) AND (1990:2023[pdat])) |
| <b>Commentaires</b>  |                                                                                                                                                                                                                                                                                                                                                                                                                                                                                                                                                                                                                                                                                                                                                                                                                                                                                                                                                                                                                                                                                                                                                                                                                                                                                                                                                                                                                                                                                                                                                                                                                                                                                                                                                                                                                                                                                                                                                                                                                                                                                                                                                                                                                                                                                                                                                                                                                                                                                                                                                                                                                                                                                                                                                                                                                                                                |
| <b>Réf. trouvée.</b> | 2 références trouvées le 19.09.2023                                                                                                                                                                                                                                                                                                                                                                                                                                                                                                                                                                                                                                                                                                                                                                                                                                                                                                                                                                                                                                                                                                                                                                                                                                                                                                                                                                                                                                                                                                                                                                                                                                                                                                                                                                                                                                                                                                                                                                                                                                                                                                                                                                                                                                                                                                                                                                                                                                                                                                                                                                                                                                                                                                                                                                                                                            |

#### 4.2.8 ProQuest Dissertations and Theses A&I

|                  |                                                                                                                                                                                                                                                                                                                                                                                                                                                                                                                                                                                                                                                                                                                                                                                                                                                                                                                                                                                                                                                                                                                                                                                                                                                                                                                                                                                                                                                                                                                                                                                                                                                                                                                                                                                                                                                                                                                                                                                                                                                                                                                                                                                                              |
|------------------|--------------------------------------------------------------------------------------------------------------------------------------------------------------------------------------------------------------------------------------------------------------------------------------------------------------------------------------------------------------------------------------------------------------------------------------------------------------------------------------------------------------------------------------------------------------------------------------------------------------------------------------------------------------------------------------------------------------------------------------------------------------------------------------------------------------------------------------------------------------------------------------------------------------------------------------------------------------------------------------------------------------------------------------------------------------------------------------------------------------------------------------------------------------------------------------------------------------------------------------------------------------------------------------------------------------------------------------------------------------------------------------------------------------------------------------------------------------------------------------------------------------------------------------------------------------------------------------------------------------------------------------------------------------------------------------------------------------------------------------------------------------------------------------------------------------------------------------------------------------------------------------------------------------------------------------------------------------------------------------------------------------------------------------------------------------------------------------------------------------------------------------------------------------------------------------------------------------|
| <b>Stratégie</b> | (noft(((Integrat* N/1 (care OR healthcare OR delivery OR pathway* OR "hospital care")) OR "transition* care" OR "clinical pathway*" OR "patient care plan*" OR ((multi*disciplinary OR inter*professional OR inter*disciplinary OR multi*speciality OR multi*agency OR inter*agency OR multi*professional OR inter*sectoral) N/1 (team* OR care OR healthcare OR collaboration OR intervention* OR management OR approach* OR program* OR treatment*)) OR hand*off* OR ((coordinat* OR collaborat*) N/1 (care OR service* OR program* OR approach*)) AND ("discharge planning" OR (patient N/1 (admission OR discharge)) OR readmission* OR rehospitalization) AND ((older N/1 (patient* OR people OR subject* OR age* OR adult* OR m?n OR male* OR wom?n OR female* OR population* OR person* OR individual*)) OR aging OR ageing OR senior* OR "late life") AND (((alternative OR complementary OR traditional OR animal OR pet OR bee OR honey OR propolis OR leech OR physical OR manual OR manipulative OR dance OR music OR movement OR art OR energy OR spiritual OR clown OR humor OR humour OR laughter OR bio-resonance OR bioresonance OR garden* OR horticultural OR nature OR reflex OR diet OR nutrition OR "non-pharmacological" OR kinesis OR occupational OR meditative OR recreation OR exercise*) N/1 therap*) OR "exercise training" OR "spiritual healing" OR acupuncture OR acupressure OR bodywork OR Shiatsu OR apitherap* OR homeotherap* OR homeopath* OR hirudotherap* OR leeching OR physiotherap* OR massage OR osteopath* OR chiropra* OR chirotherap* OR masso?therap* OR reflexolog* OR kinesiotherap* OR pilates OR naturopath* OR dietary OR dietician* OR yoga OR "tai ji" OR Taiji*quan OR "Tai Chi" OR "chi kung" OR chigung OR qi*gong OR psychotherap* OR hypnos* OR hypnotherap* OR meditation OR relaxation OR mindfulness OR "breathing exercise*" OR "guided imagery" OR reflexotherap* OR breathwork OR cupping OR Reiki OR iridology OR gelototherap* OR psychodermatology OR aromatherap* OR "essential oil*" OR phytotherap* OR clowntherap* OR ethnomedicin*OR hydrotherap* OR rehabilitation OR ((alternative OR complementary OR traditional OR African OR |
|------------------|--------------------------------------------------------------------------------------------------------------------------------------------------------------------------------------------------------------------------------------------------------------------------------------------------------------------------------------------------------------------------------------------------------------------------------------------------------------------------------------------------------------------------------------------------------------------------------------------------------------------------------------------------------------------------------------------------------------------------------------------------------------------------------------------------------------------------------------------------------------------------------------------------------------------------------------------------------------------------------------------------------------------------------------------------------------------------------------------------------------------------------------------------------------------------------------------------------------------------------------------------------------------------------------------------------------------------------------------------------------------------------------------------------------------------------------------------------------------------------------------------------------------------------------------------------------------------------------------------------------------------------------------------------------------------------------------------------------------------------------------------------------------------------------------------------------------------------------------------------------------------------------------------------------------------------------------------------------------------------------------------------------------------------------------------------------------------------------------------------------------------------------------------------------------------------------------------------------|

|                      |                                                                                                                                                                                                                                                                                                                                                                                                                                                                                                                                                                                                                                                                                                                                                                                                                                                                                                                                                                                                                                                                                                                                                                                                                                                                                                                                                                                                                                                                                                                                                                                                                                                                                                                                                                                                                                                                                                                                                                                                                                                                                                                                                                                                                                                                                                                                                                                                                                                                                                                                                                                                                                                                                                                                                                                                                                                        |
|----------------------|--------------------------------------------------------------------------------------------------------------------------------------------------------------------------------------------------------------------------------------------------------------------------------------------------------------------------------------------------------------------------------------------------------------------------------------------------------------------------------------------------------------------------------------------------------------------------------------------------------------------------------------------------------------------------------------------------------------------------------------------------------------------------------------------------------------------------------------------------------------------------------------------------------------------------------------------------------------------------------------------------------------------------------------------------------------------------------------------------------------------------------------------------------------------------------------------------------------------------------------------------------------------------------------------------------------------------------------------------------------------------------------------------------------------------------------------------------------------------------------------------------------------------------------------------------------------------------------------------------------------------------------------------------------------------------------------------------------------------------------------------------------------------------------------------------------------------------------------------------------------------------------------------------------------------------------------------------------------------------------------------------------------------------------------------------------------------------------------------------------------------------------------------------------------------------------------------------------------------------------------------------------------------------------------------------------------------------------------------------------------------------------------------------------------------------------------------------------------------------------------------------------------------------------------------------------------------------------------------------------------------------------------------------------------------------------------------------------------------------------------------------------------------------------------------------------------------------------------------------|
|                      | Chinese OR herbal OR Indian OR kampo OR Korean OR American OR Mongolian OR oriental OR Tibetan OR Arabic OR Islamic OR persian OR unani OR native OR indigenous OR naturopathic OR energy OR spiritual OR vibrational OR osteopathic OR psycho-cutaneous OR psychocutaneous OR Integrative OR physical OR manipulative) N/2 medicine*)) AND YR(1990-3000) NOT (noft(((Integrat* N/1 (care OR healthcare OR delivery OR pathway* OR "hospital care") OR "transition* care" OR "clinical pathway*" OR "patient care plan*" OR ((multi*disciplinary OR inter*professional OR inter*disciplinary OR multi*speciality OR multi*agency OR inter*agency OR multi*professional OR inter*sectoral) N/1 (team* OR care OR healthcare OR collaboration OR intervention* OR management OR approach* OR program* OR treatment*)) OR hand*off* OR ((coordinat* OR collaborat*) N/1 (care OR service* OR program* OR approach*)) AND (hospital* OR inpatient*) AND ((older N/1 (patient* OR people OR subject* OR age* OR adult* OR m?n OR male* OR wom?n OR female* OR population* OR person* OR individual*)) OR aging OR ageing OR senior* OR "late life") AND (((alternative OR complementary OR traditional OR animal OR pet OR bee OR honey OR propolis OR leech OR physical OR manual OR manipulative OR dance OR music OR movement OR art OR energy OR spiritual OR clown OR humor OR humour OR laughter OR bio-resonance OR bioresonance OR garden* OR horticultural OR nature OR reflex OR diet OR nutrition OR "non-pharmacological" OR kinesis OR occupational OR meditative OR recreation OR exercise*) N/1 therap*) OR "exercise training" OR "spiritual healing" OR acupuncture OR acupressure OR bodywork OR Shiatsu OR apitherap* OR homeotherap* OR homeopath* OR hirudotherap* OR leeching OR physiotherap* OR massage OR osteopath* OR chiropra* OR chirotherap* OR masso?therap* OR reflexolog* OR kinesiotherap* OR pilates OR naturopath* OR dietary OR dietician* OR yoga OR "tai ji" OR Taiji*quan OR "Tai Chi" OR "chi kung" OR chigung OR qi*gong OR psychotherap* OR hypnos* OR hypnotherap* OR meditation OR relaxation OR mindfulness OR "breathing exercise*" OR "guided imagery" OR reflexotherap* OR breathwork OR cupping OR Reiki OR iridology OR gelotherap* OR psychodermatology OR aromatherap* OR "essential oil*" OR phytotherap* OR clowntherap* OR ethnomedicin*OR hydrotherap* OR rehabilitation OR ((alternative OR complementary OR traditional OR African OR Chinese OR herbal OR Indian OR kampo OR Korean OR American OR Mongolian OR oriental OR Tibetan OR Arabic OR Islamic OR persian OR unani OR native OR indigenous OR naturopathic OR energy OR spiritual OR vibrational OR osteopathic OR psycho-cutaneous OR psychocutaneous OR Integrative OR physical OR manipulative) N/2 medicine*)) AND YR(1990-3000)) |
| <b>Commentaires</b>  | <b>Ajouter le filtre thèses de doctorat</b>                                                                                                                                                                                                                                                                                                                                                                                                                                                                                                                                                                                                                                                                                                                                                                                                                                                                                                                                                                                                                                                                                                                                                                                                                                                                                                                                                                                                                                                                                                                                                                                                                                                                                                                                                                                                                                                                                                                                                                                                                                                                                                                                                                                                                                                                                                                                                                                                                                                                                                                                                                                                                                                                                                                                                                                                            |
| <b>Réf. trouvée.</b> | 0 références trouvées le 20.09.2023                                                                                                                                                                                                                                                                                                                                                                                                                                                                                                                                                                                                                                                                                                                                                                                                                                                                                                                                                                                                                                                                                                                                                                                                                                                                                                                                                                                                                                                                                                                                                                                                                                                                                                                                                                                                                                                                                                                                                                                                                                                                                                                                                                                                                                                                                                                                                                                                                                                                                                                                                                                                                                                                                                                                                                                                                    |

#### 4.2.9 CAMBase Complementary and Alternative Medicine

|                      |                                                                                                                                               |
|----------------------|-----------------------------------------------------------------------------------------------------------------------------------------------|
| <b>Stratégie</b>     | Integrated health care admission older complementary therapy<br>Integrated health care discharge older complementary therapy                  |
| <b>Commentaires</b>  | <a href="http://cambase.dmz.uni-wh.de/opencam/index_en.html">http://cambase.dmz.uni-wh.de/opencam/index_en.html</a><br>recherche par subjects |
| <b>Réf. trouvée.</b> | Recherche 1 : 134 résultats au 21.09.2023<br>Recherche 1 : 132 résultats au 21.09.2023                                                        |

### 4.3 Résultats

| Base de données                         | Date de la recherche | Nombre de références... |                           |
|-----------------------------------------|----------------------|-------------------------|---------------------------|
|                                         |                      | ...trouvées...          | ...et après dédoublonnage |
| Medline OVID SP                         | 20.09.2023           | 150                     | 108                       |
| Embase.com                              | 20.09.2023           | 223                     | 217                       |
| PubMed                                  | 20.09.2023           | 2                       | 2                         |
| CINAHL EBSCO                            | 20.09.2023           | 137                     | 136                       |
| PsycINFO OVID SP                        | 20.09.2023           | 7                       | 5                         |
| Cochrane Library<br>Wiley               | 20.09.2023           | 1                       | 1                         |
| Web of Science –<br>Core collection     | 20.09.2023           | 47                      | 37                        |
| ProQuest<br>Dissertations and<br>Theses | 20.09.2023           | 0                       | 0                         |
| <u>Total</u>                            |                      | <u>567</u>              | <u>506</u>                |

## Integrative review

---

Les éléments/composantes/concepts centraux (Core components) des soins intégrés  
chez la personne âgée

### Recherche effectuée par :

Pauline MELLY, School of Health Sciences, HES-SO Valais-Wallis, 5, Chemin de l'Agasse, CH-1950 Sion, Switzerland

### Recherche révisée par :

**Date** : 20.12.2023

### A l'attention de :

Elodie PERRUCHOUD, School of Health Sciences, HES-SO Valais-Wallis, 5, Chemin de l'Agasse, CH-1950 Sion, Switzerland

## Table des matières

|       |                                                                                         |    |
|-------|-----------------------------------------------------------------------------------------|----|
| 1     | Questions de recherche .....                                                            | 29 |
| 2     | Sources de données exploitées .....                                                     | 29 |
| 3     | Articles d'intérêt .....                                                                | 29 |
| 4     | Recherches ciblant les modèles de soins intégrés en hôpital chez la personne âgée ..... | 30 |
| 4.1   | Vocabulaire .....                                                                       | 30 |
| 4.2   | Stratégies de recherche .....                                                           | 31 |
| 4.2.1 | Embase.com .....                                                                        | 31 |
| 4.2.2 | Medline Ovid SP .....                                                                   | 31 |
| 4.2.3 | CINAHL ULTIMATE EBSCO .....                                                             | 32 |
| 4.2.4 | APA PsychInfo Ovid SP .....                                                             | 33 |
| 4.2.5 | Web of Science -Core collection .....                                                   | 34 |
| 4.2.6 | Cochrane library Wiley .....                                                            | 34 |
| 4.2.7 | Pubmed .....                                                                            | 35 |
| 4.2.8 | ProQuest Dissertations and Theses A&I .....                                             | 36 |
| 4.3   | Résultats sans suppression de l'équation précédente .....                               | 37 |
| 4.4   | Résultats AVEC suppression de l'équation précédente .....                               | 37 |

## 5 Questions de recherche

- Les éléments/composantes/concepts centraux (Core components) des soins intégrés chez la personne âgée
  - Components OR attribut OR éléments clés...
  - Ne pas mettre hospitalisation
  - prendre concept soins personne âgée

## 6 Sources de données exploitées

### Bases de données principales

Medline Ovid ALL,

Embase.com

CINAHL

APA PsycInfo Ovid

Web of Science Core Collection

ProQuest Dissertations & Theses A&I

Cochrane Library

Pubmed

## 7 Articles d'intérêt

|          |                                                                                                                                                      |
|----------|------------------------------------------------------------------------------------------------------------------------------------------------------|
| 24363635 | A framework for understanding outcomes of integrated care programs for the hospitalised elderly                                                      |
| 35485287 | Complexities of care: Common components of models of care in geriatrics                                                                              |
| 23687482 | Understanding integrated care: a comprehensive conceptual framework based on the integrative functions of primary care                               |
| 30220893 | The Core Dimensions of Integrated Care: A Literature Review to Support the Development of a Comprehensive Framework for Implementing Integrated Care |
| 25759607 | Towards a taxonomy for integrated care: a mixed-methods study                                                                                        |
| 30498405 | Values of Integrated Care: A Systematic Review                                                                                                       |

## 8 Recherches ciblant les modèles de soins intégrés en hôpital chez la personne âgée

### 8.1 Vocabulaire

| Concepts                                | Integrated care                                                                                                                                                                                                                                                                                                                                                                                        | aged                                                                                                                                                                                                                                                                      | Composants                                                                                                                                                           |
|-----------------------------------------|--------------------------------------------------------------------------------------------------------------------------------------------------------------------------------------------------------------------------------------------------------------------------------------------------------------------------------------------------------------------------------------------------------|---------------------------------------------------------------------------------------------------------------------------------------------------------------------------------------------------------------------------------------------------------------------------|----------------------------------------------------------------------------------------------------------------------------------------------------------------------|
| <b>Mots libres</b><br>Syntaxe<br>Embase | (Integrat* NEXT/1 (care OR healthcare OR delivery OR pathway* OR "hospital care")) OR "transition* care" OR ((multi\$disciplinary OR inter\$professional OR inter\$disciplinary OR multi\$speciality OR multi\$agency OR inter\$agency OR multi\$professional OR inter\$sectoral) NEXT/1 (team* OR care OR healthcare OR collaboration OR intervention*)) OR ((coordinat* OR collaborat*) NEXT/1 care) | elder* OR eldest OR geriatr* OR "old aged" OR "oldest old*" OR "very old*" OR (older NEXT/1 (patient* OR people OR subject* OR age* OR adult* OR m?n OR male* OR wom?n OR female* OR population* OR person* OR individual*)) OR aging OR ageing OR senior* OR "late life" | framework* OR theor* OR concept* OR principle* OR process* OR dimension* OR component* OR key* OR factor* OR classification OR characteristic* OR element* OR value* |
| <b>Emtree</b>                           | 'integrated health care system'/de OR 'collaborative care team'/de OR 'multidisciplinary team'/de OR 'transitional care'/de                                                                                                                                                                                                                                                                            | 'aged'/exp OR 'elderly care'/exp OR 'geriatric patient'/de OR 'geriatrics'/exp OR 'geriatric care'/exp                                                                                                                                                                    |                                                                                                                                                                      |
| <b>MeSH</b>                             | exp Delivery of Health Care, Integrated/ OR Transitional Care/ OR Patient Care Team/                                                                                                                                                                                                                                                                                                                   | exp Aged/ OR exp Geriatrics/ OR exp Geriatric Nursing/ OR exp Geriatric Assessment/ OR exp Geriatric Psychiatry/                                                                                                                                                          |                                                                                                                                                                      |
| <b>CINAHL</b>                           | MH "Health Care Delivery, Integrated" OR MH "Transitional Care" OR MH "Multidisciplinary Care Team"                                                                                                                                                                                                                                                                                                    | MH "Aged+" OR MH "Gerontologic Nursing+" OR MH "Geriatric Assessment+" OR MH "Geriatrics" OR MH "Geriatric Psychiatry" OR MH "Gerontologic Care"                                                                                                                          |                                                                                                                                                                      |

#### Limitations

Date de publication : 2013 à 2024

Type de publications non comprise: NOT (letter\* OR news OR comment\* OR editorial\* OR congres\* OR abstract\* OR dissertation abstract\* OR conference\*)

Limitation sur le titre pour les soins intégrés et pour les composants

## 8.2 Stratégies de recherche

### 8.2.1 Embase.com

|                                      |                                                                                                                                                                                                                                                                                                                                                                                                                                                                                                                                                                                                                                                                                                                                                                                                                                                                                                                                                                                                                                                                                                                                                                                                                                                                                                                                                                                                                                                                                                                                                                                                                                                                                                                                                                                                                                                                                                                                                                                                                                                                                                                                                                                                                                                                                                                                                                                                                                                         |
|--------------------------------------|---------------------------------------------------------------------------------------------------------------------------------------------------------------------------------------------------------------------------------------------------------------------------------------------------------------------------------------------------------------------------------------------------------------------------------------------------------------------------------------------------------------------------------------------------------------------------------------------------------------------------------------------------------------------------------------------------------------------------------------------------------------------------------------------------------------------------------------------------------------------------------------------------------------------------------------------------------------------------------------------------------------------------------------------------------------------------------------------------------------------------------------------------------------------------------------------------------------------------------------------------------------------------------------------------------------------------------------------------------------------------------------------------------------------------------------------------------------------------------------------------------------------------------------------------------------------------------------------------------------------------------------------------------------------------------------------------------------------------------------------------------------------------------------------------------------------------------------------------------------------------------------------------------------------------------------------------------------------------------------------------------------------------------------------------------------------------------------------------------------------------------------------------------------------------------------------------------------------------------------------------------------------------------------------------------------------------------------------------------------------------------------------------------------------------------------------------------|
| <b>Stratégie</b>                     | ((('integrated health care system'/de OR 'collaborative care team'/de OR 'multidisciplinary team'/de OR 'transitional care'/de OR ((Integrat* NEXT/1 (care OR healthcare OR delivery OR pathway* OR "hospital care")) OR ((multi\$disciplinary OR inter\$professional OR inter\$disciplinary OR multi\$speciality OR multi\$agency OR inter\$agency OR multi\$professional OR inter\$sectoral) NEXT/1 (team* OR care OR healthcare OR collaboration OR intervention*)) OR ((coordinat* OR collaborat*) NEXT/1 care)):ti) AND ('aged'/exp OR 'elderly care'/exp OR 'geriatric patient'/de OR 'geriatrics'/exp OR 'geriatric care'/exp OR (elder* OR eldest OR geriatr* OR "old aged" OR "oldest old*" OR "very old*" OR (older NEXT/1 (patient* OR people OR subject* OR age* OR adult* OR m?n OR male* OR wom?n OR female* OR population* OR person* OR individual*)) OR aging OR ageing OR senior* OR "late life"):ab,ti) AND ((framework* OR theor* OR concept* OR principle* OR process* OR dimension* OR component* OR key* OR factor* OR classification OR characteristic* OR element* OR value*):ti) AND ([2013-2024]/py)) NOT (((Conference Abstract]/lim OR [Letter]/lim OR [Note]/lim OR [Editorial]/lim))                                                                                                                                                                                                                                                                                                                                                                                                                                                                                                                                                                                                                                                                                                                                                                                                                                                                                                                                                                                                                                                                                                                                                                                                                                     |
| <b>Commentaires</b>                  |                                                                                                                                                                                                                                                                                                                                                                                                                                                                                                                                                                                                                                                                                                                                                                                                                                                                                                                                                                                                                                                                                                                                                                                                                                                                                                                                                                                                                                                                                                                                                                                                                                                                                                                                                                                                                                                                                                                                                                                                                                                                                                                                                                                                                                                                                                                                                                                                                                                         |
| <b>Réf. trouvées.</b>                | 529 références trouvées le 17.01.2024                                                                                                                                                                                                                                                                                                                                                                                                                                                                                                                                                                                                                                                                                                                                                                                                                                                                                                                                                                                                                                                                                                                                                                                                                                                                                                                                                                                                                                                                                                                                                                                                                                                                                                                                                                                                                                                                                                                                                                                                                                                                                                                                                                                                                                                                                                                                                                                                                   |
| <b>Stratégie NOT équation modèle</b> | ((('integrated health care system'/de OR 'collaborative care team'/de OR 'multidisciplinary team'/de OR 'transitional care'/de OR ((Integrat* NEXT/1 (care OR healthcare OR delivery OR pathway* OR "hospital care")) OR ((multi\$disciplinary OR inter\$professional OR inter\$disciplinary OR multi\$speciality OR multi\$agency OR inter\$agency OR multi\$professional OR inter\$sectoral) NEXT/1 (team* OR care OR healthcare OR collaboration OR intervention*)) OR ((coordinat* OR collaborat*) NEXT/1 care)):ti) AND ('aged'/exp OR 'elderly care'/exp OR 'geriatric patient'/de OR 'geriatrics'/exp OR 'geriatric care'/exp OR (elder* OR eldest OR geriatr* OR "old aged" OR "oldest old*" OR "very old*" OR (older NEXT/1 (patient* OR people OR subject* OR age* OR adult* OR m?n OR male* OR wom?n OR female* OR population* OR person* OR individual*)) OR aging OR ageing OR senior* OR "late life"):ab,ti) AND ((framework* OR theor* OR concept* OR principle* OR process* OR dimension* OR component* OR key* OR factor* OR classification OR characteristic* OR element* OR value*):ti) AND ([2013-2024]/py)) NOT (((Conference Abstract]/lim OR [Letter]/lim OR [Note]/lim OR [Editorial]/lim)) <b>NOT</b> (((('integrated health care system'/de OR 'collaborative care team'/de OR 'multidisciplinary team'/de OR 'transitional care'/de OR ((Integrat* NEXT/1 (care OR healthcare OR delivery OR pathway* OR "hospital care")) OR ((multi\$disciplinary OR inter\$professional OR inter\$disciplinary OR multi\$speciality OR multi\$agency OR inter\$agency OR multi\$professional OR inter\$sectoral) NEXT/1 (team* OR care OR healthcare OR collaboration OR intervention*)) OR ((coordinat* OR collaborat*) NEXT/1 care)):ti) AND ('hospitalization'/de OR 'hospital patient'/de OR (hospital* OR inpatient*):ab,ti) AND ('aged'/exp OR 'elderly care'/exp OR 'geriatric patient'/de OR 'geriatrics'/exp OR 'geriatric care'/exp OR (elder* OR eldest OR geriatr* OR "old aged" OR "oldest old*" OR "very old*" OR (older NEXT/1 (patient* OR people OR subject* OR age* OR adult* OR m?n OR male* OR wom?n OR female* OR population* OR person* OR individual*)) OR aging OR ageing OR senior* OR "late life"):ab,ti) AND ((model* OR framework* OR program* OR theor* OR concept* OR principle* OR process*):ti) AND ([2013-2024]/py)) NOT (((Conference Abstract]/lim OR [Letter]/lim OR [Note]/lim OR [Editorial]/lim))) |
| <b>Réf. trouvées.</b>                | 459 références trouvées le 17.01.2024                                                                                                                                                                                                                                                                                                                                                                                                                                                                                                                                                                                                                                                                                                                                                                                                                                                                                                                                                                                                                                                                                                                                                                                                                                                                                                                                                                                                                                                                                                                                                                                                                                                                                                                                                                                                                                                                                                                                                                                                                                                                                                                                                                                                                                                                                                                                                                                                                   |

### 8.2.2 Medline Ovid SP

|                  |                                                                                                                                                                                                                                                                                                                                                                                                                                                                                                                                                                                                                                                                                                                                                                                                                                                                                                                                                                                                                                                                                                                                                                                                                            |
|------------------|----------------------------------------------------------------------------------------------------------------------------------------------------------------------------------------------------------------------------------------------------------------------------------------------------------------------------------------------------------------------------------------------------------------------------------------------------------------------------------------------------------------------------------------------------------------------------------------------------------------------------------------------------------------------------------------------------------------------------------------------------------------------------------------------------------------------------------------------------------------------------------------------------------------------------------------------------------------------------------------------------------------------------------------------------------------------------------------------------------------------------------------------------------------------------------------------------------------------------|
| <b>Stratégie</b> | ((exp "Delivery of Health Care, Integrated"/ OR "Transitional Care"/ OR "Patient Care Team"/ OR ((Integrat* ADJ (care OR healthcare OR delivery OR pathway* OR "hospital care")) OR "transition* care" OR ((multi?disciplinary OR inter?professional OR inter?disciplinary OR multi?speciality OR multi?agency OR inter?agency OR multi?professional OR inter?sectoral) ADJ (team? OR care OR healthcare OR collaboration OR intervention*)) OR ((coordinat* OR collaborat*) ADJ care)).ti.) AND (exp "Aged"/ OR exp "Geriatrics"/ OR exp "Geriatric Nursing"/ OR exp "Geriatric Assessment"/ OR exp "Geriatric Psychiatry"/ OR (elder* OR eldest OR geriatr* OR "old aged" OR "oldest old*" OR "very old*" OR (older ADJ (patient* OR people OR subject* OR age* OR adult* OR man OR men OR male* OR woman OR women OR female* OR population* OR person* OR individual*)) OR aging OR ageing OR senior* OR "late life").ab,ti.) AND ((framework* OR theor* OR concept* OR principle* OR process* OR dimension* OR component* OR key* OR factor* OR classification OR characteristic* OR element* OR value*).ti.) NOT ((letter* OR news OR comment* OR editorial* OR congres* OR abstract* OR dissertation abstract*).pt.) |
|------------------|----------------------------------------------------------------------------------------------------------------------------------------------------------------------------------------------------------------------------------------------------------------------------------------------------------------------------------------------------------------------------------------------------------------------------------------------------------------------------------------------------------------------------------------------------------------------------------------------------------------------------------------------------------------------------------------------------------------------------------------------------------------------------------------------------------------------------------------------------------------------------------------------------------------------------------------------------------------------------------------------------------------------------------------------------------------------------------------------------------------------------------------------------------------------------------------------------------------------------|

|                                      |                                                                                                                                                                                                                                                                                                                                                                                                                                                                                                                                                                                                                                                                                                                                                                                                                                                                                                                                                                                                                                                                                                                                                                                                                                                                                                                                                                                                                                                                                                                                                                                                                                                                                                                                                                                                                                                                                                                                                                                                                                                                                                                                                                                                                                                                                                                                                                                                                                                   |
|--------------------------------------|---------------------------------------------------------------------------------------------------------------------------------------------------------------------------------------------------------------------------------------------------------------------------------------------------------------------------------------------------------------------------------------------------------------------------------------------------------------------------------------------------------------------------------------------------------------------------------------------------------------------------------------------------------------------------------------------------------------------------------------------------------------------------------------------------------------------------------------------------------------------------------------------------------------------------------------------------------------------------------------------------------------------------------------------------------------------------------------------------------------------------------------------------------------------------------------------------------------------------------------------------------------------------------------------------------------------------------------------------------------------------------------------------------------------------------------------------------------------------------------------------------------------------------------------------------------------------------------------------------------------------------------------------------------------------------------------------------------------------------------------------------------------------------------------------------------------------------------------------------------------------------------------------------------------------------------------------------------------------------------------------------------------------------------------------------------------------------------------------------------------------------------------------------------------------------------------------------------------------------------------------------------------------------------------------------------------------------------------------------------------------------------------------------------------------------------------------|
|                                      |                                                                                                                                                                                                                                                                                                                                                                                                                                                                                                                                                                                                                                                                                                                                                                                                                                                                                                                                                                                                                                                                                                                                                                                                                                                                                                                                                                                                                                                                                                                                                                                                                                                                                                                                                                                                                                                                                                                                                                                                                                                                                                                                                                                                                                                                                                                                                                                                                                                   |
| <b>Commentaires</b>                  | Ovid MEDLINE(R) ALL 1946 to January 17, 2024<br><b>Ajouter le filtre de date manuellement 2013-2024</b>                                                                                                                                                                                                                                                                                                                                                                                                                                                                                                                                                                                                                                                                                                                                                                                                                                                                                                                                                                                                                                                                                                                                                                                                                                                                                                                                                                                                                                                                                                                                                                                                                                                                                                                                                                                                                                                                                                                                                                                                                                                                                                                                                                                                                                                                                                                                           |
| <b>Réf. trouvées.</b>                | 475 références trouvées le 17.01.2024                                                                                                                                                                                                                                                                                                                                                                                                                                                                                                                                                                                                                                                                                                                                                                                                                                                                                                                                                                                                                                                                                                                                                                                                                                                                                                                                                                                                                                                                                                                                                                                                                                                                                                                                                                                                                                                                                                                                                                                                                                                                                                                                                                                                                                                                                                                                                                                                             |
| <b>Stratégie NOT équation modèle</b> | ((exp "Delivery of Health Care, Integrated"/ OR "Transitional Care"/ OR "Patient Care Team"/ OR ((Integrat* ADJ (care OR healthcare OR delivery OR pathway* OR "hospital care")) OR "transition* care" OR ((multi?disciplinary OR inter?professional OR inter?disciplinary OR multi?speciality OR multi?agency OR inter?agency OR multi?professional OR inter?sectoral) ADJ (team? OR care OR healthcare OR collaboration OR intervention*)) OR ((coordinat* OR collaborat*) ADJ care)).ti.) AND (exp "Aged"/ OR exp "Geriatrics"/ OR exp "Geriatric Nursing"/ OR exp "Geriatric Assessment"/ OR exp "Geriatric Psychiatry"/ OR (elder* OR eldest OR geriatr* OR "old aged" OR "oldest old*" OR "very old*" OR (older ADJ (patient* OR people OR subject* OR age* OR adult* OR man OR men OR male* OR woman OR women OR female* OR population* OR person* OR individual*)) OR aging OR ageing OR senior* OR "late life").ab,ti.) AND ((framework* OR theor* OR concept* OR principle* OR process* OR dimension* OR component* OR key* OR factor* OR classification OR characteristic* OR element* OR value*).ti.) NOT ((letter* OR news OR comment* OR editorial* OR congres* OR abstract* OR dissertation abstract*).pt.)) NOT ((exp "Delivery of Health Care, Integrated"/ OR "Transitional Care"/ OR "Patient Care Team"/ OR ((Integrat* ADJ (care OR healthcare OR delivery OR pathway* OR "hospital care")) OR "transition* care" OR ((multi?disciplinary OR inter?professional OR inter?disciplinary OR multi?speciality OR multi?agency OR inter?agency OR multi?professional OR inter?sectoral) ADJ (team? OR care OR healthcare OR collaboration OR intervention*)) OR ((coordinat* OR collaborat*) ADJ care)).ti.) AND (Hospitalization/ OR Inpatients/ OR (hospital* OR inpatient*).ab,ti.) AND (exp "Aged"/ OR exp "Geriatrics"/ OR exp "Geriatric Nursing"/ OR exp "Geriatric Assessment"/ OR exp "Geriatric Psychiatry"/ OR (elder* OR eldest OR geriatr* OR "old aged" OR "oldest old*" OR "very old*" OR (older ADJ (patient* OR people OR subject* OR age* OR adult* OR man OR men OR male* OR woman OR women OR female* OR population* OR person* OR individual*)) OR aging OR ageing OR senior* OR "late life").ab,ti.) AND ((Model* OR framework* OR program* OR theor* OR concept* OR principle* OR process*).ti.) NOT ((letter* OR news OR comment* OR editorial* OR congres* OR abstract* OR dissertation abstract*).pt.)) |
| <b>Commentaires</b>                  | Ovid MEDLINE(R) ALL 1946 to January 16, 2024<br><b>Ajouter le filtre de date manuellement 2013-2024</b>                                                                                                                                                                                                                                                                                                                                                                                                                                                                                                                                                                                                                                                                                                                                                                                                                                                                                                                                                                                                                                                                                                                                                                                                                                                                                                                                                                                                                                                                                                                                                                                                                                                                                                                                                                                                                                                                                                                                                                                                                                                                                                                                                                                                                                                                                                                                           |
| <b>Réf. trouvées.</b>                | 384 références trouvées le 17.01.2024                                                                                                                                                                                                                                                                                                                                                                                                                                                                                                                                                                                                                                                                                                                                                                                                                                                                                                                                                                                                                                                                                                                                                                                                                                                                                                                                                                                                                                                                                                                                                                                                                                                                                                                                                                                                                                                                                                                                                                                                                                                                                                                                                                                                                                                                                                                                                                                                             |

### 8.2.3 CINAHL ULTIMATE EBSCO

|                                      |                                                                                                                                                                                                                                                                                                                                                                                                                                                                                                                                                                                                                                                                                                                                                                                                                                                                                                                                                                                                                                                                                                                                                                                                                                                                                                                                                                                                                                                                                                                                                                                                     |
|--------------------------------------|-----------------------------------------------------------------------------------------------------------------------------------------------------------------------------------------------------------------------------------------------------------------------------------------------------------------------------------------------------------------------------------------------------------------------------------------------------------------------------------------------------------------------------------------------------------------------------------------------------------------------------------------------------------------------------------------------------------------------------------------------------------------------------------------------------------------------------------------------------------------------------------------------------------------------------------------------------------------------------------------------------------------------------------------------------------------------------------------------------------------------------------------------------------------------------------------------------------------------------------------------------------------------------------------------------------------------------------------------------------------------------------------------------------------------------------------------------------------------------------------------------------------------------------------------------------------------------------------------------|
| <b>Stratégie</b>                     | (( (MH "Health Care Delivery, Integrated" OR MH "Transitional Care" OR MH "Multidisciplinary Care Team" ) OR TI ( (Integrat* W1 (care OR healthcare OR delivery OR pathway* OR "hospital care")) OR "transition* care" OR ((multi#disciplinary OR inter#professional OR inter#disciplinary OR multi#speciality OR multi#agency OR inter#agency OR multi#professional OR inter#sectoral) W1 (team* OR care OR healthcare OR collaboration OR intervention*)) OR ((coordinat* OR collaborat*) W1 care) )) AND ( (MH "Aged+" OR MH "Gerontologic Nursing+" OR MH "Geriatric Assessment+" OR MH "Geriatrics" OR MH "Geriatric Psychiatry" OR MH "Gerontologic Care" ) OR TI ( elder* OR eldest OR geriatr* OR "old aged" OR "oldest old*" OR "very old*" OR (older W1 (patient* OR people OR subject* OR age* OR adult* OR man OR men OR male* OR woman OR women OR female* OR population* OR person* OR individual*)) OR aging OR ageing OR senior* OR "late life" ) OR AB ( elder* OR eldest OR geriatr* OR "old aged" OR "oldest old*" OR "very old*" OR (older W1 (patient* OR people OR subject* OR age* OR adult* OR man OR men OR male* OR woman OR women OR female* OR population* OR person* OR individual*)) OR aging OR ageing OR senior* OR "late life" )) AND ( TI (framework* OR theor* OR concept* OR principle* OR process* OR dimension* OR component* OR key* OR factor* OR classification OR characteristic* OR element* OR value* )) NOT ( PT ( letter* OR news OR comment* OR editorial* OR congres* OR abstract* OR dissertation abstract* OR conference* )) AND ( PY 2013-2024 ) |
| <b>Commentaires</b>                  |                                                                                                                                                                                                                                                                                                                                                                                                                                                                                                                                                                                                                                                                                                                                                                                                                                                                                                                                                                                                                                                                                                                                                                                                                                                                                                                                                                                                                                                                                                                                                                                                     |
| <b>Réf. trouvée.</b>                 | 578 références trouvées le 17.01.2024                                                                                                                                                                                                                                                                                                                                                                                                                                                                                                                                                                                                                                                                                                                                                                                                                                                                                                                                                                                                                                                                                                                                                                                                                                                                                                                                                                                                                                                                                                                                                               |
| <b>Stratégie NOT équation modèle</b> | (( (MH "Health Care Delivery, Integrated" OR MH "Transitional Care" OR MH "Multidisciplinary Care Team" ) OR TI ( (Integrat* W1 (care OR healthcare OR delivery OR pathway* OR "hospital care")) OR "transition* care" OR ((multi#disciplinary OR inter#professional OR inter#disciplinary OR multi#speciality OR multi#agency OR inter#agency OR multi#professional OR inter#sectoral) W1 (team* OR care OR healthcare OR collaboration OR intervention*)) OR ((coordinat* OR collaborat*) W1 care) )) AND ( (MH "Aged+" OR                                                                                                                                                                                                                                                                                                                                                                                                                                                                                                                                                                                                                                                                                                                                                                                                                                                                                                                                                                                                                                                                        |

|                       |                                                                                                                                                                                                                                                                                                                                                                                                                                                                                                                                                                                                                                                                                                                                                                                                                                                                                                                                                                                                                                                                                                                                                                                                                                                                                                                                                                                                                                                                                                                                                                                                                                                                                                                                                                                                                                                                                                                                                                                                                                                                                                                                                                                                                                                                                                                                                                                                                                                                                                                                                                                                                                                                                                                                                             |
|-----------------------|-------------------------------------------------------------------------------------------------------------------------------------------------------------------------------------------------------------------------------------------------------------------------------------------------------------------------------------------------------------------------------------------------------------------------------------------------------------------------------------------------------------------------------------------------------------------------------------------------------------------------------------------------------------------------------------------------------------------------------------------------------------------------------------------------------------------------------------------------------------------------------------------------------------------------------------------------------------------------------------------------------------------------------------------------------------------------------------------------------------------------------------------------------------------------------------------------------------------------------------------------------------------------------------------------------------------------------------------------------------------------------------------------------------------------------------------------------------------------------------------------------------------------------------------------------------------------------------------------------------------------------------------------------------------------------------------------------------------------------------------------------------------------------------------------------------------------------------------------------------------------------------------------------------------------------------------------------------------------------------------------------------------------------------------------------------------------------------------------------------------------------------------------------------------------------------------------------------------------------------------------------------------------------------------------------------------------------------------------------------------------------------------------------------------------------------------------------------------------------------------------------------------------------------------------------------------------------------------------------------------------------------------------------------------------------------------------------------------------------------------------------------|
|                       | MH "Gerontologic Nursing+" OR MH "Geriatric Assessment+" OR MH "Geriatrics" OR MH "Geriatric Psychiatry" OR MH "Gerontologic Care" ) OR TI ( elder* OR eldest OR geriatr* OR "old aged" OR "oldest old*" OR "very old*" OR (older W1 (patient* OR people OR subject* OR age* OR adult* OR man OR men OR male* OR woman OR women OR female* OR population* OR person* OR individual*)) OR aging OR ageing OR senior* OR "late life" ) OR AB ( elder* OR eldest OR geriatr* OR "old aged" OR "oldest old*" OR "very old*" OR (older W1 (patient* OR people OR subject* OR age* OR adult* OR man OR men OR male* OR woman OR women OR female* OR population* OR person* OR individual*)) OR aging OR ageing OR senior* OR "late life" )) AND ( TI (framework* OR theor* OR concept* OR principle* OR process* OR dimension* OR component* OR key* OR factor* OR classification OR characteristic* OR element* OR value* )) NOT ( PT ( letter* OR news OR comment* OR editorial* OR congres* OR abstract* OR dissertation abstract* OR conference* )) AND ( PY 2013-2024 )) NOT ((( MH "Health Care Delivery, Integrated" OR MH "Transitional Care" OR MH "Multidisciplinary Care Team" ) OR TI ( (Integrat* W1 (care OR healthcare OR delivery OR pathway* OR "hospital care")) OR "transition* care" OR ((multi#disciplinary OR inter#professional OR inter#disciplinary OR multi#speciality OR multi#agency OR inter#agency OR multi#professional OR inter#sectoral) W1 (team* OR care OR healthcare OR collaboration OR intervention*)) OR ((coordinat* OR collaborat*) W1 care )) AND (( MH "Hospitalization" OR MH "Hospitalization of Older Persons" OR MH "Inpatients" ) OR TI ( hospital* OR inpatient* ) OR AB ( hospital* OR inpatient* )) AND (( MH "Aged+" OR MH "Gerontologic Nursing+" OR MH "Geriatric Assessment+" OR MH "Geriatrics" OR MH "Geriatric Psychiatry" OR MH "Gerontologic Care" ) OR TI ( elder* OR eldest OR geriatr* OR "old aged" OR "oldest old*" OR "very old*" OR (older W1 (patient* OR people OR subject* OR age* OR adult* OR man OR men OR male* OR woman OR women OR female* OR population* OR person* OR individual*)) OR aging OR ageing OR senior* OR "late life" ) OR AB ( elder* OR eldest OR geriatr* OR "old aged" OR "oldest old*" OR "very old*" OR (older W1 (patient* OR people OR subject* OR age* OR adult* OR man OR men OR male* OR woman OR women OR female* OR population* OR person* OR individual*)) OR aging OR ageing OR senior* OR "late life" )) AND ( TI ( model* OR framework* OR program* OR theor* OR concept* OR principle* OR process* )) NOT ( PT ( letter* OR news OR comment* OR editorial* OR congres* OR abstract* OR dissertation abstract* OR conference* )) AND ( PY 2013-2024 )) |
| <b>Réf. trouvées.</b> | 485 références trouvées le 17.01.2024                                                                                                                                                                                                                                                                                                                                                                                                                                                                                                                                                                                                                                                                                                                                                                                                                                                                                                                                                                                                                                                                                                                                                                                                                                                                                                                                                                                                                                                                                                                                                                                                                                                                                                                                                                                                                                                                                                                                                                                                                                                                                                                                                                                                                                                                                                                                                                                                                                                                                                                                                                                                                                                                                                                       |

### 8.2.4 APA PsychInfo Ovid SP

|                                      |                                                                                                                                                                                                                                                                                                                                                                                                                                                                                                                                                                                                                                                                                                                                                                                                                                                                                                                                                                                                                                                                                                                                                                                                                                          |
|--------------------------------------|------------------------------------------------------------------------------------------------------------------------------------------------------------------------------------------------------------------------------------------------------------------------------------------------------------------------------------------------------------------------------------------------------------------------------------------------------------------------------------------------------------------------------------------------------------------------------------------------------------------------------------------------------------------------------------------------------------------------------------------------------------------------------------------------------------------------------------------------------------------------------------------------------------------------------------------------------------------------------------------------------------------------------------------------------------------------------------------------------------------------------------------------------------------------------------------------------------------------------------------|
| <b>Stratégie</b>                     | ((integrated services/ OR Transitional Care/ OR Patient Care Team/ OR ((Integrat* ADJ (care OR healthcare OR delivery OR pathway* OR "hospital care")) OR "transition* care" OR ((multi?disciplinary OR inter?professional OR inter?disciplinary OR multi?speciality OR multi?agency OR inter?agency OR multi?professional OR inter?sectoral) ADJ (team? OR care OR healthcare OR collaboration OR intervention*)) OR ((coordinat* OR collaborat*) ADJ care)).ti.) AND (exp Aged/ OR exp Geriatrics/ OR exp Geriatric Assessment/ OR exp Geriatric Psychiatry/ OR (elder* OR eldest OR geriatr* OR "old aged" OR "oldest old*" OR "very old*" OR (older ADJ (patient* OR people OR subject* OR age* OR adult* OR man OR men OR male* OR woman OR women OR female* OR population* OR person* OR individual*)) OR aging OR ageing OR senior* OR "late life").ab,ti.) AND ((framework* OR theor* OR concept* OR principle* OR process* OR dimension* OR component* OR key* OR factor* OR classification OR characteristic* OR element* OR value*).ti.) NOT ((letter* OR news OR comment* OR editorial* OR congres* OR abstract* OR dissertation abstract*).pt.)                                                                             |
| <b>Commentaires</b>                  | APA PsycInfo 1806 to January Week 2 2024<br><b>Ajouter le filtre de date manuellement : 2013-2024</b>                                                                                                                                                                                                                                                                                                                                                                                                                                                                                                                                                                                                                                                                                                                                                                                                                                                                                                                                                                                                                                                                                                                                    |
| <b>Réf. trouvée.</b>                 | 36 références trouvées le 17.01.2024                                                                                                                                                                                                                                                                                                                                                                                                                                                                                                                                                                                                                                                                                                                                                                                                                                                                                                                                                                                                                                                                                                                                                                                                     |
| <b>Stratégie NOT équation modèle</b> | ((integrated services/ OR Transitional Care/ OR Patient Care Team/ OR ((Integrat* ADJ (care OR healthcare OR delivery OR pathway* OR "hospital care")) OR "transition* care" OR ((multi?disciplinary OR inter?professional OR inter?disciplinary OR multi?speciality OR multi?agency OR inter?agency OR multi?professional OR inter?sectoral) ADJ (team? OR care OR healthcare OR collaboration OR intervention*)) OR ((coordinat* OR collaborat*) ADJ care)).ti.) AND (exp Aged/ OR exp Geriatrics/ OR exp Geriatric Assessment/ OR exp Geriatric Psychiatry/ OR (elder* OR eldest OR geriatr* OR "old aged" OR "oldest old*" OR "very old*" OR (older ADJ (patient* OR people OR subject* OR age* OR adult* OR man OR men OR male* OR woman OR women OR female* OR population* OR person* OR individual*)) OR aging OR ageing OR senior* OR "late life").ab,ti.) AND ((framework* OR theor* OR concept* OR principle* OR process* OR dimension* OR component* OR key* OR factor* OR classification OR characteristic* OR element* OR value*).ti.) NOT ((letter* OR news OR comment* OR editorial* OR congres* OR abstract* OR dissertation abstract*).pt.)) NOT (((integrated services/ OR Transitional Care/ OR Patient Care Team/ OR |

|                       |                                                                                                                                                                                                                                                                                                                                                                                                                                                                                                                                                                                                                                                                                                                                                                                                                                                                                                                                                                                                                                                                                |
|-----------------------|--------------------------------------------------------------------------------------------------------------------------------------------------------------------------------------------------------------------------------------------------------------------------------------------------------------------------------------------------------------------------------------------------------------------------------------------------------------------------------------------------------------------------------------------------------------------------------------------------------------------------------------------------------------------------------------------------------------------------------------------------------------------------------------------------------------------------------------------------------------------------------------------------------------------------------------------------------------------------------------------------------------------------------------------------------------------------------|
|                       | ((Integrat* ADJ (care OR healthcare OR delivery OR pathway* OR "hospital care")) OR "transition* care" OR ((multi?disciplinary OR inter?professional OR inter?disciplinary OR multi?speciality OR multi?agency OR inter?agency OR multi?professional OR inter?sectoral) ADJ (team? OR care OR healthcare OR collaboration OR intervention*)) OR ((coordinat* OR collaborat*) ADJ care)).ti.) AND (Hospitalization/ OR Inpatients/ OR (hospital* OR inpatient*).ab,ti.) AND (exp Aged/ OR exp Geriatrics/ OR exp Geriatric Assessment/ OR exp Geriatric Psychiatry/ OR (elder* OR eldest OR geriatr* OR "old aged" OR "oldest old*" OR "very old*" OR (older ADJ (patient* OR people OR subject* OR age* OR adult* OR man OR men OR male* OR woman OR women OR female* OR population* OR person* OR individual*)) OR aging OR ageing OR senior* OR "late life").ab,ti.) AND ((Model* OR framework* OR program* OR theor* OR concept* OR principle* OR process*).ti.)) NOT ((letter* OR news OR comment* OR editorial* OR congres* OR abstract* OR dissertation abstract*).pt.)) |
| <b>Commentaires</b>   | APA PsycInfo 1806 to January Week 2 2024<br><b>Ajouter le filtre de date manuellement : 2013-2024</b>                                                                                                                                                                                                                                                                                                                                                                                                                                                                                                                                                                                                                                                                                                                                                                                                                                                                                                                                                                          |
| <b>Réf. trouvées.</b> | 29 références trouvées le 17.01.2024                                                                                                                                                                                                                                                                                                                                                                                                                                                                                                                                                                                                                                                                                                                                                                                                                                                                                                                                                                                                                                           |

### 8.2.5 Web of Science -Core collection

|                                      |                                                                                                                                                                                                                                                                                                                                                                                                                                                                                                                                                                                                                                                                                                                                                                                                                                                                                                                                                                                                                                                                                                                                                                                                                                                                                                                                                                                                                                                                                                                                                                                                                                                                 |
|--------------------------------------|-----------------------------------------------------------------------------------------------------------------------------------------------------------------------------------------------------------------------------------------------------------------------------------------------------------------------------------------------------------------------------------------------------------------------------------------------------------------------------------------------------------------------------------------------------------------------------------------------------------------------------------------------------------------------------------------------------------------------------------------------------------------------------------------------------------------------------------------------------------------------------------------------------------------------------------------------------------------------------------------------------------------------------------------------------------------------------------------------------------------------------------------------------------------------------------------------------------------------------------------------------------------------------------------------------------------------------------------------------------------------------------------------------------------------------------------------------------------------------------------------------------------------------------------------------------------------------------------------------------------------------------------------------------------|
| <b>Stratégie</b>                     | Ti=((Integrat* NEAR/1 (care OR healthcare OR delivery OR pathway* OR "hospital care")) OR "transition* care" OR ((multi\$disciplinary OR inter\$professional OR inter\$disciplinary OR multi\$speciality OR multi\$agency OR inter\$agency OR multi\$professional OR inter\$sectoral) NEAR/1 (team* OR care OR healthcare OR collaboration OR intervention*)) OR ((coordinat* OR collaborat*) NEAR/1 care)) AND TS=((older NEAR/1 (patient* OR people OR subject* OR age* OR adult* OR m?n OR male* OR wom?n OR female* OR population* OR person* OR individual*)) OR aging OR ageing OR senior* OR "late life") AND Ti=( framework* OR theor* OR concept* OR principle* OR process* OR dimension* OR component* OR key* OR factor* OR classification OR characteristic* OR element* OR value*) AND PY=(2013-2024) AND DT=(Article OR Review OR Book)                                                                                                                                                                                                                                                                                                                                                                                                                                                                                                                                                                                                                                                                                                                                                                                                           |
| <b>Commentaires</b>                  |                                                                                                                                                                                                                                                                                                                                                                                                                                                                                                                                                                                                                                                                                                                                                                                                                                                                                                                                                                                                                                                                                                                                                                                                                                                                                                                                                                                                                                                                                                                                                                                                                                                                 |
| <b>Réf. trouvée.</b>                 | 206 références trouvées le 17.01.2024 (206 – 1701)                                                                                                                                                                                                                                                                                                                                                                                                                                                                                                                                                                                                                                                                                                                                                                                                                                                                                                                                                                                                                                                                                                                                                                                                                                                                                                                                                                                                                                                                                                                                                                                                              |
| <b>Stratégie NOT équation modèle</b> | (Ti=((Integrat* NEAR/1 (care OR healthcare OR delivery OR pathway* OR "hospital care")) OR "transition* care" OR ((multi\$disciplinary OR inter\$professional OR inter\$disciplinary OR multi\$speciality OR multi\$agency OR inter\$agency OR multi\$professional OR inter\$sectoral) NEAR/1 (team* OR care OR healthcare OR collaboration OR intervention*)) OR ((coordinat* OR collaborat*) NEAR/1 care)) AND TS=((older NEAR/1 (patient* OR people OR subject* OR age* OR adult* OR m?n OR male* OR wom?n OR female* OR population* OR person* OR individual*)) OR aging OR ageing OR senior* OR "late life") AND Ti=( framework* OR theor* OR concept* OR principle* OR process* OR dimension* OR component* OR key* OR factor* OR classification OR characteristic* OR element* OR value*) AND PY=(2013-2024) AND DT=(Article OR Review OR Book)) NOT (Ti=((Integrat* NEAR/1 (care OR healthcare OR delivery OR pathway* OR "hospital care")) OR "transition* care" OR ((multi\$disciplinary OR inter\$professional OR inter\$disciplinary OR multi\$speciality OR multi\$agency OR inter\$agency OR multi\$professional OR inter\$sectoral) NEAR/1 (team* OR care OR healthcare OR collaboration OR intervention*)) OR ((coordinat* OR collaborat*) NEAR/1 care)) AND TS=(hospital* OR inpatient*) AND TS=((older NEAR/1 (patient* OR people OR subject* OR age* OR adult* OR m?n OR male* OR wom?n OR female* OR population* OR person* OR individual*)) OR aging OR ageing OR senior* OR "late life") AND Ti=(model* OR framework* OR program* OR theor* OR concept* OR principle* OR process*) AND PY=(2013-2024) AND DT=(Article OR Review OR Book)) |
| <b>Réf. trouvées.</b>                | 169 références trouvées le 17.01.2024                                                                                                                                                                                                                                                                                                                                                                                                                                                                                                                                                                                                                                                                                                                                                                                                                                                                                                                                                                                                                                                                                                                                                                                                                                                                                                                                                                                                                                                                                                                                                                                                                           |

### 8.2.6 Cochrane library Wiley

|                  |                                                                                                                                                                                                                                                                                                                                                                                                                                                                                                                                                                                                                                                                                                                                                                                                                              |
|------------------|------------------------------------------------------------------------------------------------------------------------------------------------------------------------------------------------------------------------------------------------------------------------------------------------------------------------------------------------------------------------------------------------------------------------------------------------------------------------------------------------------------------------------------------------------------------------------------------------------------------------------------------------------------------------------------------------------------------------------------------------------------------------------------------------------------------------------|
| <b>Stratégie</b> | ((Integrat* NEXT (care OR healthcare OR delivery OR pathway* OR "hospital care")) OR "transition care" OR "transitional care" OR ("multi disciplinary" OR multidisciplinary OR "inter professional" OR interprofessional OR interdisciplinary OR "inter disciplinary" OR multispeciality OR "multi speciality" OR multiagency OR "multi agency" OR interagency OR "inter agency" OR multiprofessional OR "multi professional" OR intersectoral OR "inter sectoral") NEXT (team* OR care OR healthcare OR collaboration OR intervention*)) OR ((coordinat* OR collaborat*) NEXT care)):ti,kw AND (elder* OR eldest OR geriatr* OR "old aged" OR (oldest NEXT old*) OR (very NEXT old*) OR (older NEXT (patient* OR people OR subject* OR age* OR adult* OR man OR men OR male* OR woman OR women OR female* OR population* OR |
|------------------|------------------------------------------------------------------------------------------------------------------------------------------------------------------------------------------------------------------------------------------------------------------------------------------------------------------------------------------------------------------------------------------------------------------------------------------------------------------------------------------------------------------------------------------------------------------------------------------------------------------------------------------------------------------------------------------------------------------------------------------------------------------------------------------------------------------------------|

|                                      |                                                                                                                                                                                                                                                              |
|--------------------------------------|--------------------------------------------------------------------------------------------------------------------------------------------------------------------------------------------------------------------------------------------------------------|
|                                      | person* OR individual*) OR aging OR ageing OR senior* OR "late life"):ab,ti,kw AND (framework* OR theor* OR concept* OR principle* OR process* OR dimension* OR component* OR key* OR factor* OR classification OR characteristic* OR element* OR value*):ti |
| <b>Commentaires</b>                  | Cochrane Database of Systematic Reviews - Issue 1 of 12, January 2024<br>Cochrane Central Register of Controlled Trials - Issue 1 of 12, January 2024<br><b>Ajouter le filtre de date manuellement</b>                                                       |
| <b>Réf. trouvée.</b>                 | 36 références trouvées le 17.01.2024<br>36 trials                                                                                                                                                                                                            |
| <b>Stratégie NOT équation modèle</b> | Ne supporte la recherche avec NOT                                                                                                                                                                                                                            |

### 8.2.7 Pubmed

|                                      |                                                                                                                                                                                                                                                                                                                                                                                                                                                                                                                                                                                                                                                                                                                                                                                                                                                                                                                                                                                                                                                                                                                                                                                                                                                                                                                                                                                                                                                                                                                                                                                                                                                                                                                                                                                                                                                                                                                                                                                                                                                                                                                         |
|--------------------------------------|-------------------------------------------------------------------------------------------------------------------------------------------------------------------------------------------------------------------------------------------------------------------------------------------------------------------------------------------------------------------------------------------------------------------------------------------------------------------------------------------------------------------------------------------------------------------------------------------------------------------------------------------------------------------------------------------------------------------------------------------------------------------------------------------------------------------------------------------------------------------------------------------------------------------------------------------------------------------------------------------------------------------------------------------------------------------------------------------------------------------------------------------------------------------------------------------------------------------------------------------------------------------------------------------------------------------------------------------------------------------------------------------------------------------------------------------------------------------------------------------------------------------------------------------------------------------------------------------------------------------------------------------------------------------------------------------------------------------------------------------------------------------------------------------------------------------------------------------------------------------------------------------------------------------------------------------------------------------------------------------------------------------------------------------------------------------------------------------------------------------------|
| <b>Stratégie</b>                     | ((("Integrative care"[Title] OR "integrating care"[Title] OR "Integrative healthcare"[Title] OR "Integrative pathway"[Title] OR "Integrated care"[Title] OR "Integrated healthcare"[Title] OR "Integrated delivery"[Title] OR "Integrated pathway"[Title] OR "Integrated hospital care"[Title] OR "transition care"[Title] OR "transitional care"[Title] OR ("multi disciplinary"[Title] OR multidisciplinary[Title] OR "inter professional"[Title] OR interprofessional[Title] OR interdisciplinary[Title] OR "inter disciplinary"[Title] OR multispeciality[Title] OR "multi speciality"[Title] OR multiagency[Title] OR "multi agency"[Title] OR interagency[Title] OR "inter agency"[Title] OR multiprofessional[Title] OR "multi professional"[Title] OR intersectoral[Title] OR "inter sectoral"[Title]) AND (team*[Title] OR care[Title] OR healthcare[Title] OR collaboration[Title] OR intervention*[Title])) OR "collaborative healthcare"[Title] OR "collaborative care"[Title]) AND (elder*[Title/Abstract] OR eldest[Title/Abstract] OR geriatr*[Title/Abstract] OR "old aged"[Title/Abstract] OR "oldest old*"[Title/Abstract] OR "very old*"[Title/Abstract] OR "older patient*"[Title/Abstract] OR "older people"[Title/Abstract] OR "older age*"[Title/Abstract] OR "older adult*"[Title/Abstract] OR "older man"[Title/Abstract] OR "older men"[Title/Abstract] OR "older woman"[Title/Abstract] OR "older women"[Title/Abstract] OR "older population*"[Title/Abstract] OR "older person*"[Title/Abstract] OR "older individual*"[Title/Abstract] OR aging[Title/Abstract] OR ageing[Title/Abstract] OR senior*[Title/Abstract] OR "late life"[Title/Abstract]) AND (framework*[Title] OR theor*[Title] OR concept*[Title] OR principle*[Title] OR process*[Title] OR dimension*[Title] OR component*[Title] OR key[Title] OR keys[Title] OR factor*[Title] OR classification[Title] OR characteristic*[Title] OR element*[Title] OR value*[Title])) NOT medline[SB] NOT (letter* OR news OR comment* OR editorial* OR congress* OR dissertation OR abstract* OR conference*)) AND (2013:2024[pdat]) |
| <b>Commentaires</b>                  |                                                                                                                                                                                                                                                                                                                                                                                                                                                                                                                                                                                                                                                                                                                                                                                                                                                                                                                                                                                                                                                                                                                                                                                                                                                                                                                                                                                                                                                                                                                                                                                                                                                                                                                                                                                                                                                                                                                                                                                                                                                                                                                         |
| <b>Réf. trouvée.</b>                 | 28 références trouvées le 17.01.2024                                                                                                                                                                                                                                                                                                                                                                                                                                                                                                                                                                                                                                                                                                                                                                                                                                                                                                                                                                                                                                                                                                                                                                                                                                                                                                                                                                                                                                                                                                                                                                                                                                                                                                                                                                                                                                                                                                                                                                                                                                                                                    |
| <b>Stratégie NOT équation modèle</b> | ((("Integrative care"[Title] OR "integrating care"[Title] OR "Integrative healthcare"[Title] OR "Integrative pathway"[Title] OR "Integrated care"[Title] OR "Integrated healthcare"[Title] OR "Integrated delivery"[Title] OR "Integrated pathway"[Title] OR "Integrated hospital care"[Title] OR "transition care"[Title] OR "transitional care"[Title] OR ("multi disciplinary"[Title] OR multidisciplinary[Title] OR "inter professional"[Title] OR interprofessional[Title] OR interdisciplinary[Title] OR "inter disciplinary"[Title] OR multispeciality[Title] OR "multi speciality"[Title] OR multiagency[Title] OR "multi agency"[Title] OR interagency[Title] OR "inter agency"[Title] OR multiprofessional[Title] OR "multi professional"[Title] OR intersectoral[Title] OR "inter sectoral"[Title]) AND (team*[Title] OR care[Title] OR healthcare[Title] OR collaboration[Title] OR intervention*[Title])) OR "collaborative healthcare"[Title] OR "collaborative care"[Title]) AND (elder*[Title/Abstract] OR eldest[Title/Abstract] OR geriatr*[Title/Abstract] OR "old aged"[Title/Abstract] OR "oldest old*"[Title/Abstract] OR "very old*"[Title/Abstract] OR "older patient*"[Title/Abstract] OR "older people"[Title/Abstract] OR "older age*"[Title/Abstract] OR "older adult*"[Title/Abstract] OR "older man"[Title/Abstract] OR "older men"[Title/Abstract] OR "older woman"[Title/Abstract] OR "older women"[Title/Abstract] OR "older population*"[Title/Abstract] OR "older person*"[Title/Abstract] OR "older individual*"[Title/Abstract] OR aging[Title/Abstract] OR ageing[Title/Abstract] OR senior*[Title/Abstract] OR "late life"[Title/Abstract]) AND (framework*[Title] OR theor*[Title] OR concept*[Title] OR principle*[Title] OR process*[Title] OR dimension*[Title] OR component*[Title] OR key[Title] OR keys[Title] OR factor*[Title] OR classification[Title] OR                                                                                                                                                                                                              |

|                       |                                                                                                                                                                                                                                                                                                                                                                                                                                                                                                                                                                                                                                                                                                                                                                                                                                                                                                                                                                                                                                                                                                                                                                                                                                                                                                                                                                                                                                                                                                                                                                                                                                                                                                                                                                                                                                                                                                                                                                                                                                                                                                                                                                                                                                                                                                                  |
|-----------------------|------------------------------------------------------------------------------------------------------------------------------------------------------------------------------------------------------------------------------------------------------------------------------------------------------------------------------------------------------------------------------------------------------------------------------------------------------------------------------------------------------------------------------------------------------------------------------------------------------------------------------------------------------------------------------------------------------------------------------------------------------------------------------------------------------------------------------------------------------------------------------------------------------------------------------------------------------------------------------------------------------------------------------------------------------------------------------------------------------------------------------------------------------------------------------------------------------------------------------------------------------------------------------------------------------------------------------------------------------------------------------------------------------------------------------------------------------------------------------------------------------------------------------------------------------------------------------------------------------------------------------------------------------------------------------------------------------------------------------------------------------------------------------------------------------------------------------------------------------------------------------------------------------------------------------------------------------------------------------------------------------------------------------------------------------------------------------------------------------------------------------------------------------------------------------------------------------------------------------------------------------------------------------------------------------------------|
|                       | <p>characteristic*[Title] OR element*[Title] OR value*[Title])) NOT medline[<sub>sb</sub>] NOT (letter* OR news OR comment* OR editorial* OR congres* OR dissertation OR abstract* OR conference*)) AND (2013:2024[<sub>pd</sub>at])) NOT (((("Integrative care"[Title] OR "integrating care"[Title] OR "Integrative healthcare"[Title] OR "Integrative pathway*"[Title] OR "Integrated care"[Title] OR "Integrated healthcare"[Title] OR "Integrated delivery"[Title] OR "Integrated pathway*"[Title] OR "Integrated hospital care"[Title] OR "transition care"[Title] OR "transitional care"[Title] OR ("multi disciplinary"[Title] OR multidisciplinary[Title] OR "inter professional"[Title] OR interprofessional[Title] OR interdisciplinary[Title] OR "inter disciplinary"[Title] OR multispeciality[Title] OR "multi speciality"[Title] OR multiagency[Title] OR "multi agency"[Title] OR interagency[Title] OR "inter agency"[Title] OR multiprofessional[Title] OR "multi professional"[Title] OR intersectoral[Title] OR "inter sectoral"[Title]) AND (team*[Title] OR care[Title] OR healthcare[Title] OR collaboration[Title] OR intervention*[Title])) OR "collaborative healthcare"[Title] OR "collaborative care"[Title]) AND (hospital*[Title/Abstract] OR inpatient*[Title/Abstract]) AND (elder*[Title/Abstract] OR eldest[Title/Abstract] OR geriatr*[Title/Abstract] OR "old aged"[Title/Abstract] OR "oldest old*"[Title/Abstract] OR "very old*"[Title/Abstract] OR "older patient*"[Title/Abstract] OR "older people"[Title/Abstract] OR "older age*"[Title/Abstract] OR "older adult*"[Title/Abstract] OR "older man"[Title/Abstract] OR "older men"[Title/Abstract] OR "older woman"[Title/Abstract] OR "older women"[Title/Abstract] OR "older population*"[Title/Abstract] OR "older person*"[Title/Abstract] OR "older individual*"[Title/Abstract] OR aging[Title/Abstract] OR ageing[Title/Abstract] OR senior*[Title/Abstract] OR "late life"[Title/Abstract]) AND (model*[Title] OR framework*[Title] OR program*[Title] OR theor*[Title] OR concept*[Title] OR principle*[Title] OR process*[Title])) NOT medline[<sub>sb</sub>] NOT (letter* OR news OR comment* OR editorial* OR congres* OR dissertation OR abstract* OR conference*)) AND (2013:2024[<sub>pd</sub>at]))</p> |
| <b>Réf. trouvées.</b> | 22 références trouvées le 17.01.2024                                                                                                                                                                                                                                                                                                                                                                                                                                                                                                                                                                                                                                                                                                                                                                                                                                                                                                                                                                                                                                                                                                                                                                                                                                                                                                                                                                                                                                                                                                                                                                                                                                                                                                                                                                                                                                                                                                                                                                                                                                                                                                                                                                                                                                                                             |

### 8.2.8 ProQuest Dissertations and Theses A&I

|                                      |                                                                                                                                                                                                                                                                                                                                                                                                                                                                                                                                                                                                                                                                                                                                                                                                                                                                                                                                                                                                                                                                                                                                                                                                                                                                                                                                                                                                                                                                                                                                                         |
|--------------------------------------|---------------------------------------------------------------------------------------------------------------------------------------------------------------------------------------------------------------------------------------------------------------------------------------------------------------------------------------------------------------------------------------------------------------------------------------------------------------------------------------------------------------------------------------------------------------------------------------------------------------------------------------------------------------------------------------------------------------------------------------------------------------------------------------------------------------------------------------------------------------------------------------------------------------------------------------------------------------------------------------------------------------------------------------------------------------------------------------------------------------------------------------------------------------------------------------------------------------------------------------------------------------------------------------------------------------------------------------------------------------------------------------------------------------------------------------------------------------------------------------------------------------------------------------------------------|
| <b>Stratégie</b>                     | <p>TI((Integrat* N/1 (care OR healthcare OR delivery OR pathway* OR "hospital care")) OR "transition* care" OR ((multi*disciplinary OR inter*professional OR inter*disciplinary OR multi*speciality OR multi*agency OR inter*agency OR multi*professional OR inter*sectoral) N/1 (team* OR care OR healthcare OR collaboration OR intervention*)) OR ((coordinat* OR collaborat*) N/1 care)) AND AB,TI((older N/1 (patient* OR people OR subject* OR age* OR adult* OR m?n OR male* OR wom?n OR female* OR population* OR person* OR individual*)) OR aging OR ageing OR senior* OR "late life") AND TI(framework* OR theor* OR concept* OR principle* OR process* OR dimension* OR component* OR key* OR factor* OR classification OR characteristic* OR element* OR value*) AND YR(2013-3000)</p>                                                                                                                                                                                                                                                                                                                                                                                                                                                                                                                                                                                                                                                                                                                                                     |
| <b>Commentaires</b>                  | <b>Ajouter le filtre thèses de doctorat</b>                                                                                                                                                                                                                                                                                                                                                                                                                                                                                                                                                                                                                                                                                                                                                                                                                                                                                                                                                                                                                                                                                                                                                                                                                                                                                                                                                                                                                                                                                                             |
| <b>Réf. trouvée.</b>                 | 5 résultats trouvés le 17.01.2024                                                                                                                                                                                                                                                                                                                                                                                                                                                                                                                                                                                                                                                                                                                                                                                                                                                                                                                                                                                                                                                                                                                                                                                                                                                                                                                                                                                                                                                                                                                       |
| <b>Stratégie NOT équation modèle</b> | <p>(TI((Integrat* N/1 (care OR healthcare OR delivery OR pathway* OR "hospital care")) OR "transition* care" OR ((multi*disciplinary OR inter*professional OR inter*disciplinary OR multi*speciality OR multi*agency OR inter*agency OR multi*professional OR inter*sectoral) N/1 (team* OR care OR healthcare OR collaboration OR intervention*)) OR ((coordinat* OR collaborat*) N/1 care)) AND AB,TI((older N/1 (patient* OR people OR subject* OR age* OR adult* OR m?n OR male* OR wom?n OR female* OR population* OR person* OR individual*)) OR aging OR ageing OR senior* OR "late life") AND TI(framework* OR theor* OR concept* OR principle* OR process* OR dimension* OR component* OR key* OR factor* OR classification OR characteristic* OR element* OR value*) AND YR(2013-3000)) NOT (TI((Integrat* N/1 (care OR healthcare OR delivery OR pathway* OR "hospital care")) OR "transition* care" OR ((multi*disciplinary OR inter*professional OR inter*disciplinary OR multi*speciality OR multi*agency OR inter*agency OR multi*professional OR inter*sectoral) N/1 (team* OR care OR healthcare OR collaboration OR intervention*)) OR ((coordinat* OR collaborat*) N/1 care)) AND AB,TI(hospital* OR inpatient*) AND AB,TI((older N/1 (patient* OR people OR subject* OR age* OR adult* OR m?n OR male* OR wom?n OR female* OR population* OR person* OR individual*)) OR aging OR ageing OR senior* OR "late life") AND TI(model* OR framework* OR program* OR theor* OR concept* OR principle* OR process)) AND YR(2013-3000))</p> |
| <b>Commentaires</b>                  | <b>Ajouter le filtre thèses de doctorat</b>                                                                                                                                                                                                                                                                                                                                                                                                                                                                                                                                                                                                                                                                                                                                                                                                                                                                                                                                                                                                                                                                                                                                                                                                                                                                                                                                                                                                                                                                                                             |
| <b>Réf. trouvées.</b>                | 2 références trouvées le 17.01.2024                                                                                                                                                                                                                                                                                                                                                                                                                                                                                                                                                                                                                                                                                                                                                                                                                                                                                                                                                                                                                                                                                                                                                                                                                                                                                                                                                                                                                                                                                                                     |

### 8.3 Résultats sans suppression de l'équation précédente

| Base de données                   | Date de la recherche | Nombre de références...<br>...trouvées... après dédoublonnage |             |
|-----------------------------------|----------------------|---------------------------------------------------------------|-------------|
| Medline OVID SP                   | 17.01.2024           | 475                                                           | 291         |
| Embase.com                        | 17.01.2024           | 529                                                           | 514         |
| PsycINFO OVID SP                  | 17.01.2024           | 36                                                            | 15          |
| PubMed                            | 17.01.2024           | 28                                                            | 4           |
| CINAHL EBSCO                      | 17.01.2024           | 578                                                           | 339         |
| Web of Science – Core collection  | 17.01.2024           | 206                                                           | 96          |
| Cochrane Library Wiley            | 17.01.2024           | 36                                                            | 34          |
| ProQuest Dissertations and Theses | 17.01.2024           | 5                                                             | 5           |
| <u>Total</u>                      |                      | <u>1893</u>                                                   | <u>1298</u> |

### 8.4 Résultats AVEC suppression de l'équation précédente

| Base de données                   | Date de la recherche | Nombre de références...<br>...trouvées... après dédoublonnage |             |
|-----------------------------------|----------------------|---------------------------------------------------------------|-------------|
| Medline OVID SP                   | 17.01.2024           | 384                                                           | 238         |
| Embase.com                        | 17.01.2024           | 459                                                           | 445         |
| PsycINFO OVID SP                  | 17.01.2024           | 29                                                            | 12          |
| PubMed                            | 17.01.2024           | 22                                                            | 3           |
| CINAHL EBSCO                      | 17.01.2024           | 485                                                           | 295         |
| Web of Science – Core collection  | 17.01.2024           | 169                                                           | 85          |
| Cochrane Library Wiley            | 17.01.2024           | 36                                                            | 34          |
| ProQuest Dissertations and Theses | 17.01.2024           | 2                                                             | 2           |
| <u>Total</u>                      |                      | <u>1586</u>                                                   | <u>1114</u> |

**Table S1:** Critical appraisal results of the studies included in our review using the Newcastle–Ottawa Scale (NOS), as adapted for cohort studies and cross-sectional studies (1).

| Study                            | Selection                            |                                 |                           |                                                                          | Comparability                              |                                   | Outcome               |                  |                        | Total quality score |  |
|----------------------------------|--------------------------------------|---------------------------------|---------------------------|--------------------------------------------------------------------------|--------------------------------------------|-----------------------------------|-----------------------|------------------|------------------------|---------------------|--|
|                                  | Cohort Studies                       |                                 |                           |                                                                          |                                            |                                   |                       |                  |                        |                     |  |
|                                  | Representativeness of exposed cohort | Selection of non-exposed cohort | Ascertainment of exposure | Demonstration that outcome of interest was not present at start of study | Adjust for the most important risk factors | Adjust for other risk factors     | Assessment of outcome | Follow-up length | Loss to follow-up rate |                     |  |
| Norman & Sinha (39)              | 1 *                                  | 1 *                             | 1 *                       | 1 *                                                                      | 0 *                                        | 0 *                               | 1 *                   | 1 *              | 1 *                    | 7 *                 |  |
| Pineiro-Fernandez et al. (42)    | 1 *                                  | 1 *                             | 1 *                       | 1 *                                                                      | 0 *                                        | 0 *                               | 1 *                   | 1 *              | 1 *                    | 7 *                 |  |
| Tay et al. (53)                  | 1 *                                  | 1 *                             | 1 *                       | 1 *                                                                      | 1 *                                        | 1 *                               | 1 *                   | 1 *              | 0 *                    | 8 *                 |  |
| Flood et al. (64)                | 1 *                                  | 1 *                             | 1 *                       | 1 *                                                                      | 1 *                                        | 1 *                               | 1 *                   | 1 *              | 1 *                    | 9 *                 |  |
| Hung et al. (65)                 | 1 *                                  | 1 *                             | 1 *                       | 1 *                                                                      | 1 *                                        | 1 *                               | 1 *                   | 1 *              | 1 *                    | 9 *                 |  |
| Study                            | Cross-sectional Studies              |                                 |                           |                                                                          |                                            |                                   |                       |                  |                        |                     |  |
|                                  | Representativeness of the sample     | Sample size                     | Response rate             | Ascertainment of the exposure                                            | Control for the most important factor      | Control for any additional factor | Assessment of outcome | Statistical test |                        | Total quality score |  |
| Peytremann-Bridevaux et al. (44) | 0 *                                  | 1 *                             | 1 *                       | 2 *                                                                      | 1 *                                        | 0 *                               | 1 *                   | 0 *              |                        | 6 *                 |  |
| Schusselfillietaz et al. (56)    | 1 *                                  | 1 *                             | 1 *                       | 1 *                                                                      | 0 *                                        | 0 *                               | 1 *                   | 0 *              |                        | 5 *                 |  |
| Alvarez et al. (61)              | 1 *                                  | 1 *                             | 0 *                       | 0 *                                                                      | 0 *                                        | 0 *                               | 2 *                   | 0 *              |                        | 4 *                 |  |
| Weaver & Gavin (62)              | 1 *                                  | 1 *                             | 0 *                       | 0 *                                                                      | 0 *                                        | 0 *                               | 2 *                   | 0 *              |                        | 4 *                 |  |

Note: A study could be awarded a maximum of one star for each numbered item in the Selection and Outcome categories; a maximum of two stars could be given for Comparability. Studies were evaluated on a scale from 0 to 9 stars and classified into groups of low (< 6 stars), moderate (6–7 stars), or high (8–9 stars) quality. X\* = X star.

**Table S2.** Critical appraisal results of the studies included in our review using the RoB 2.0: Revised Cochrane risk of bias tool for randomised trials—randomised trial methodologies (31).

| Study               | Randomisation Process | Intended Interventions               |                                    | Missing outcome data | Measurement of the outcome | Selection of the reported result |
|---------------------|-----------------------|--------------------------------------|------------------------------------|----------------------|----------------------------|----------------------------------|
|                     |                       | Effect of assignment to intervention | Effect of adhering to intervention |                      |                            |                                  |
| Lee et al. (37)     | Low risk of bias      | Low risk of bias                     | Low risk of bias                   | Some concerns        | Some concerns              | Some concerns                    |
| Low et al. (58)     | Low risk of bias      | Some concerns                        | Some concerns                      | Some concerns        | Low risk of bias           | Some concerns                    |
| Buurman et al. (60) | Low risk of bias      | Low risk of bias                     | Low risk of bias                   | Some concerns        | Low risk of bias           | Some concerns                    |
| Barnes et al. (66)  | Low risk of bias      | High risk of bias                    | High risk of bias                  | High risk of bias    | Some concerns              | Some concerns                    |

**Table S3.** Critical appraisal results of the studies included in our review using the ROBINS-I: The Risk Of Bias In Non-randomised Studies of Interventions assessment tool (32).

| Study                 | Pre-Intervention      |                           | At Intervention                    | Post-Intervention                    |                                                 |                       |                            |                                  |
|-----------------------|-----------------------|---------------------------|------------------------------------|--------------------------------------|-------------------------------------------------|-----------------------|----------------------------|----------------------------------|
|                       | Confounding           | Selection of participants | Classification of the intervention | Intended interventions               |                                                 | Missing outcome data  | Measurement of the outcome | Selection of the reported result |
|                       |                       |                           |                                    | Effect of assignment to intervention | Effect of starting and adhering to intervention |                       |                            |                                  |
| Ha et al. (46)        | No information        | Serious risk of bias      | Serious risk of bias               | No information                       | No information                                  | No information        | Moderate risk of bias      | Moderate risk of bias            |
| Booth et al. (47)     | No information        | Serious risk of bias      | Moderate risk of bias              | No information                       | No information                                  | No information        | Serious risk of bias       | Serious risk of bias             |
| Kripalani et al. (48) | Moderate risk of bias | Moderate risk of bias     | Low risk of bias                   | Low risk of bias                     | Low risk of bias                                | Moderate risk of bias | Low risk of bias           | Moderate risk of bias            |
| Sinha et al. (52)     | No information        | Moderate risk of bias     | Moderate risk of bias              | No information                       | No information                                  | No information        | Moderate risk of bias      | Moderate risk of bias            |
| Pauly et al. (55)     | Low risk of bias      | Low risk of bias          | Low risk of bias                   | Low risk of bias                     | Low risk of bias                                | Low risk of bias      | Low risk of bias           | Moderate risk of bias            |

**Table S4.** Critical appraisal results of the studies included in our review using the Mixed Methods Appraisal Tool (MMAT) (33).

| Study              | Category of study designs               |                                                                         |                                                                                                        |                                                                                                        |                                                                                                            |                                                                                                             |                                                                                                                         |
|--------------------|-----------------------------------------|-------------------------------------------------------------------------|--------------------------------------------------------------------------------------------------------|--------------------------------------------------------------------------------------------------------|------------------------------------------------------------------------------------------------------------|-------------------------------------------------------------------------------------------------------------|-------------------------------------------------------------------------------------------------------------------------|
|                    | Screening questions                     |                                                                         | Mixed methods – Methodological quality criteria                                                        |                                                                                                        |                                                                                                            |                                                                                                             |                                                                                                                         |
|                    | S1. Are there clear research questions? | S2. Do the collected data allow the research questions to be addressed? | 5.1. Is there an adequate rationale for using a mixed-methods design to address the research question? | 5.2. Are the different components of the study effectively integrated to answer the research question? | 5.3. Are the outputs of the integration of qualitative and quantitative components adequately interpreted? | 5.4. Are divergences and inconsistencies between quantitative and qualitative results adequately addressed? | 5.5. Do the different components of the study adhere to the quality criteria of each tradition of the methods involved? |
| Sumner et al. (36) | Yes                                     | Yes                                                                     | Yes                                                                                                    | Yes                                                                                                    | Yes                                                                                                        | Cannot tell                                                                                                 | Yes                                                                                                                     |
| Naylor et al. (54) | Yes                                     | Yes                                                                     | Yes                                                                                                    | Yes                                                                                                    | Yes                                                                                                        | Cannot tell                                                                                                 | Yes                                                                                                                     |

**Table S5.** Critical appraisal results of the studies included in our review using the JBI Critical Appraisal Tools for qualitative research and case reports (34).

| Study                       | Appraisal questions |            |            |            |            |            |            |            |            |             |
|-----------------------------|---------------------|------------|------------|------------|------------|------------|------------|------------|------------|-------------|
|                             | Question 1          | Question 2 | Question 3 | Question 4 | Question 5 | Question 6 | Question 7 | Question 8 | Question 9 | Question 10 |
| <b>Qualitative research</b> |                     |            |            |            |            |            |            |            |            |             |
| Brown et al. (41)           | Yes                 | Yes        | Yes        | Yes        | Yes        | No         | No         | Yes        | Yes        | Unclear     |
| Cheong et al. (43)          | Yes                 | Yes        | Yes        | Yes        | Yes        | No         | No         | No         | No         | Unclear     |
| Schiff et al. (51)          | Yes                 | Yes        | Yes        | Yes        | Yes        | No         | No         | No         | No         | Unclear     |
| <b>Case reports</b>         |                     |            |            |            |            |            |            |            |            |             |
| Carron et al. (38)          | N/A                 | N/A        | N/A        | N/A        | N/A        | N/A        | N/A        | N/A        |            |             |
| Aldridge et al. (45)        | No                  | No         | No         | No         | Yes        | No         | No         | Yes        |            |             |
| Sanchez et al. (57)         | Yes                 | No         | No         | Yes        | Yes        | Yes        | No         | Yes        |            |             |
